# Supplementary material for: Organocatalytic C–C bond activation of cyclopropenones for ring-opening formal [3 + 2] cycloaddition with isatins
Source: Royal Society of Chemistry journal article supplement (doi:10.1039/c6qo00734a), 2017-01-01
Supplement: c6qo00734a1.pdf [file c6qo00734a1.pdf]

## Organocatalytic C-C Bond Activation of Cyclopropenones for Ring-Opening Formal [3+2] Cycloaddition with Isatins

Junyu Xu, Jing Cao, Chao Fang, Tao Lu\* and Ding Du\*

State Key Laboratory of Natural Medicines, Department of Organic Chemistry, China Pharmaceutical University, Nanjing, 210009, P. R. China.

*E-mail:* [lut163@163.com](mailto:lut163@163.com) and [ddmn9999@cpu.edu.cn](mailto:ddmn9999@cpu.edu.cn)

|                                                                                                                                                        |     |
|--------------------------------------------------------------------------------------------------------------------------------------------------------|-----|
| General Methods and Materials-----                                                                                                                     | S2  |
| General procedure for DMAP-catalyzed ring-opening [3+2] cycloaddition of cyclopropenones <b>1</b> with isatins <b>2</b> -----                          | S2  |
| General procedure for preliminary enantioselective studies on ring-opening [3+2] cycloaddition of cyclopropenones <b>1</b> with isatins <b>2</b> ----- | S3  |
| General procedure for DHPB-promoted ring-opening [3+2] cycloaddition of cyclopropenones <b>1</b> with isatins <b>2</b> -----                           | S3  |
| A preliminary enantioselective study of the cycloaddition of <b>1a</b> with <b>2a</b> promoted by several chiral isothiurea catalysts-----             | S4  |
| Characterization of products <b>3</b> and <b>4</b> -----                                                                                               | S4  |
| Copies of NMR Spectra for products <b>3</b> and <b>4</b> -----                                                                                         | S13 |
| Copies of chiral HPLC spectra for products <b>3</b> -----                                                                                              | S38 |

**General Methods and Materials.** All reactions were carried out in dry glassware, and were monitored by analytical thin-layer chromatography (TLC), which was visualized by ultraviolet light (254 nm). All solvents were obtained from commercial sources and were purified according to standard procedures. Cyclopropenones **1** are commercially available or prepared according to known procedures.<sup>[1]</sup> Purification of the products was accomplished by flash chromatography using silica gel (200-300 mesh). All NMR spectra were recorded on Bruker spectrometers, running at 300 MHz or 500 MHz for <sup>1</sup>H and 75 MHz or 125 MHz for <sup>13</sup>C respectively. Chemical shifts ( $\delta$ ) and coupling constants ( $J$ ) are reported in ppm and Hz respectively. The solvent signals were used as references (residual CHCl<sub>3</sub> in CDCl<sub>3</sub>:  $\delta_{\text{H}} = 7.26$  ppm,  $\delta_{\text{C}} = 77.0$  ppm). The following abbreviations are used to indicate the multiplicity in NMR spectra: s (singlet); d (doublet); t (triplet); q (quartet); m (multiplet). High resolution mass spectrometry (HRMS) was recorded on TOF perimer for ESI<sup>+</sup>. The e.e. value was determined via chiral HPLC analysis (Chiral pack IB, *n*-hexane and *iso*-propanol as the mobile phase).

**General procedure for DMAP-catalyzed ring-opening [3+2] cycloaddition of cyclopropenones **1** with isatins **2**.**

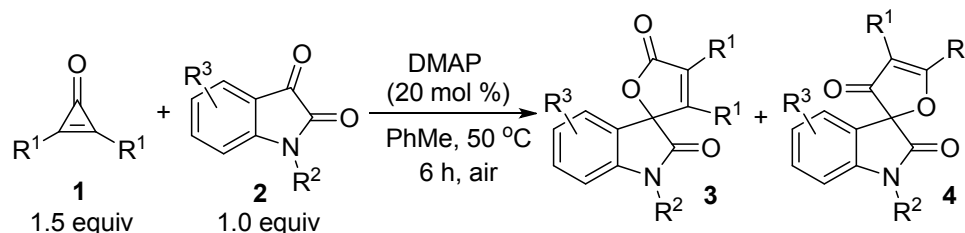

To an oven-dried 25 mL round-bottom flask was charged with cyclopropenones **1** (0.3 mmol), isatins **2** (0.2 mmol) and DMAP (5 mg, 0.04 mmol). Then anhydrous PhMe (4 mL) was added to the flask and the resulting mixture was heated at 50 °C in air for a period time (usually 6 h) until the completion of the reaction as monitored by TLC. The mixture was cooled to room temperature and was concentrated under reduced pressure. The residue was purified by chromatography on silica gel using hexane/EtOAc (15:1) as the eluent to afford products **3** or **4**.

**General procedure for preliminary enantioselective studies on ring-opening [3+2] cycloaddition of cyclopropenones **1** with isatins **2**.**

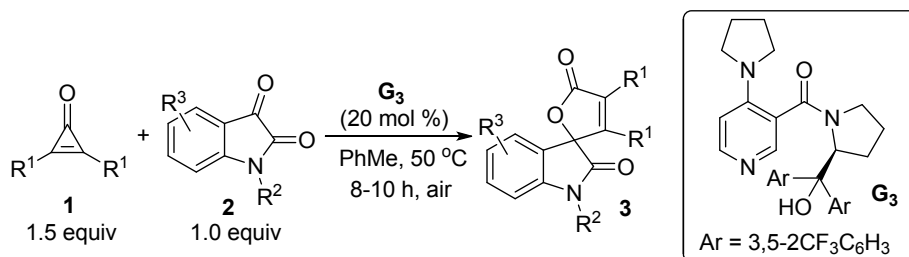

To an oven-dried 25 mL round-bottom flask was charged with cyclopropenones **1** (0.3 mmol), isatins **2** (0.2 mmol) and **H<sub>2</sub>** (28 mg, 0.04 mmol). Then anhydrous PhMe (4 mL) was added to the flask and the resulting mixture was heated at 50 °C in air for a period time (usually 8-10 h) until the completion of the reaction as monitored by TLC. The mixture was cooled to room temperature and was concentrated under reduced pressure. The residue was purified by chromatography on silica gel using hexane/EtOAc (15:1) as the eluent to afford products **3**.

**General procedure for DHPB-promoted ring-opening [3+2] annulation of cyclopropenones **1** with isatins **2**.**

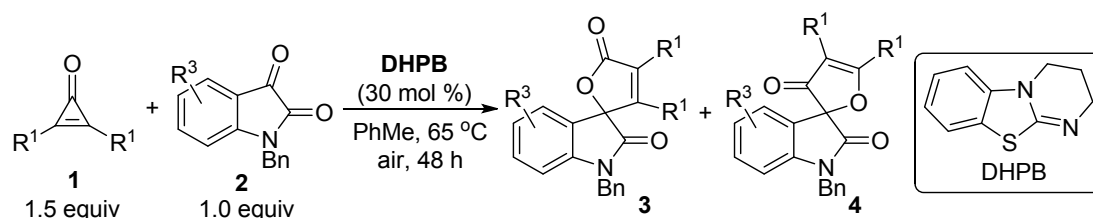

To an oven-dried 25 mL round-bottom flask was charged with cyclopropenones **1** (0.3 mmol), isatins **2** (0.2 mmol) and DHPB (11 mg, 0.06 mmol). Then anhydrous PhMe (4 mL) was added to the flask and the resulting mixture was heated at 65 °C in air for 48 h. The mixture was cooled to room temperature and was concentrated under reduced pressure. The residue was purified by chromatography on silica gel using hexane/EtOAc (15:1) as the eluent to afford products **3** and/or **4**.

**A preliminary enantioselective study of the cycloaddition of 1a with 2a promoted by several chiral isothioureia catalysts**

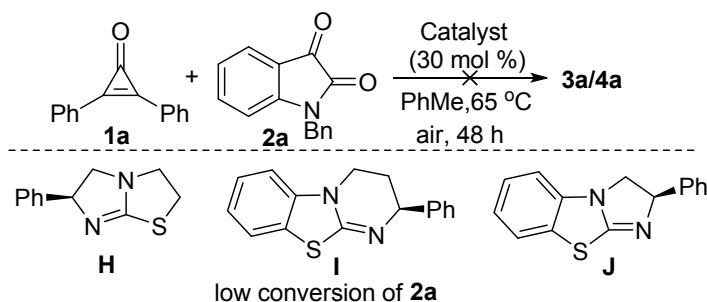

To an oven-dried 25 mL round-bottom flask was charged with cyclopropenones **1** (0.3 mmol), isatins **2** (0.2 mmol) and a chiral isothioureia catalyst (0.06 mmol). Then anhydrous PhMe (4 mL) was added to the flask and the resulting mixture was heated at 65 °C in air for 48 h. No desired products were detected as monitored by TLC.

**Characterization of products 3 and 4.**

1'-Benzyl-3,4-diphenyl-5*H*-spiro[furan-2,3'-indoline]-2',5-dione (**3a**). White solid, mp: 196-198 °C. <sup>1</sup>H NMR (300 MHz, CDCl<sub>3</sub>): δ 7.50-7.60 (m, 2H), 7.27-7.43 (m, 6H), 7.08-7.24 (m, 6H), 6.81-6.87 (m, 4H), 6.66 (d, *J* = 8.1 Hz, 1H), 5.13 and 4.56 (d×2, *J* = 15.9 Hz, 2H). <sup>13</sup>C NMR (75MHz, CDCl<sub>3</sub>): δ 171.4, 170.3, 156.5, 143.8, 134.4, 131.6, 130.3, 129.8, 129.4, 129.1, 129.0, 128.9, 128.8, 128.4, 128.1, 127.6, 126.8, 124.9, 123.7, 122.9, 114.6, 110.3, 86.3, 44.3. HRMS (ESI) calcd for C<sub>30</sub>H<sub>22</sub>NO<sub>3</sub> (M+H)<sup>+</sup>: 444.1594, found 444.1591.

1'-Methyl-3,4-diphenyl-5*H*-spiro[furan-2,3'-indoline]-2',5-dione (**3b**). White solid, mp: 202-204 °C. <sup>1</sup>H NMR (300 MHz, CDCl<sub>3</sub>): δ 7.48-7.50 (m, 2H), 7.40 (t, *J* = 7.5 Hz, 3H), 7.21-7.31 (m, 5H), 7.10-7.17 (m, 3H), 6.82-6.89 (m, 3H), 3.16 (s, 3H). <sup>13</sup>C NMR (75MHz, CDCl<sub>3</sub>): δ 171.4, 170.1, 156.4, 144.6, 131.6, 130.2, 129.7, 129.4, 129.0, 128.8, 128.3, 127.7, 124.8, 123.7, 123.0, 86.2, 26.8. HRMS (ESI) calcd for C<sub>24</sub>H<sub>18</sub>NO<sub>3</sub> (M+H)<sup>+</sup>: 368.1281, found 368.1277.

*tert*-Butyl 2',5-dioxo-3,4-diphenyl-5*H*-spiro[furan-2,3'-indoline]-1'-carboxylate (**3c**).

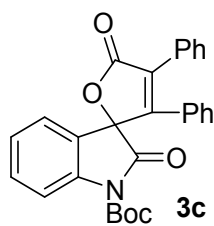

White solid, mp: 153-154 °C. <sup>1</sup>H NMR (300 MHz, CDCl<sub>3</sub>): δ 7.92 (d, *J* = 8.2 Hz, 1H), 7.52 (d, *J* = 6.4 Hz, 2H), 7.48 (t, *J* = 7.9 Hz, 1H), 7.39-7.33 (m, 4H), 7.28 (d, *J* = 7.6 Hz, 2H), 7.19 (t, *J* = 7.5 Hz, 2H), 6.91 (d, *J* = 7.4 Hz, 2H), 1.63 (s, 9H). <sup>13</sup>C NMR (125MHz, CDCl<sub>3</sub>): δ 170.9, 168.4, 155.9, 148.3, 141.0, 131.9, 129.9, 129.4, 129.2, 129.0, 128.91, 128.85, 128.4, 127.8, 125.4, 124.7, 122.0, 116.0, 85.9, 85.3, 27.9. HRMS (ESI) calcd for C<sub>28</sub>H<sub>24</sub>NO<sub>5</sub> (M+H)<sup>+</sup>: 454.1649, found 454.1649.

1'-Acetyl-3,4-diphenyl-5*H*-spiro[furan-2,3'-indoline]-2',5-dione (**3d**). White solid,

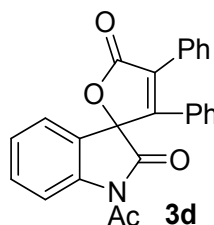

mp: 211-213 °C. <sup>1</sup>H NMR (300 MHz, CDCl<sub>3</sub>): δ 8.24 (d, *J* = 8.1 Hz, 1H), 7.47-7.53 (m, 3H), 7.27-7.43 (m, 6H), 7.18 (t, *J* = 7.5 Hz, 2H), 6.84 (d, *J* = 7.2 Hz, 2H), 2.60 (s, 3H). <sup>13</sup>C NMR (75MHz, CDCl<sub>3</sub>): δ 171.3, 170.8, 169.8, 155.7, 141.3, 132.1, 130.2, 129.7, 129.4, 129.3, 129.0, 128.7, 128.5, 127.7, 126.2, 124.6, 122.2, 117.4, 86.0, 26.3. HRMS (ESI) calcd for C<sub>25</sub>H<sub>18</sub>NO<sub>4</sub> (M+H)<sup>+</sup>: 396.1230, found 396.1230.

3,4-Diphenyl-5*H*-spiro[furan-2,3'-indoline]-2',5-dione (**3e**). White solid, mp: 198-

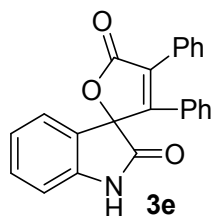

200 °C. <sup>1</sup>H NMR (500 MHz, CDCl<sub>3</sub>): δ 8.60 (brs, 1H), 7.49 (dd, *J* = 7.7, 1.7 Hz, 2H), 7.36-7.28 (m, 5H), 7.27-7.23 (m, 1H), 7.15 (t, *J* = 7.7 Hz, 2H), 7.11 (t, *J* = 7.6 Hz, 1H), 6.94-6.89 (m, 3H). <sup>13</sup>C NMR (125MHz, CDCl<sub>3</sub>): δ 172.12, 171.5, 156.3, 141.7, 131.7, 130.1, 129.9, 129.4, 129.2, 129.1, 128.9, 128.4, 127.8, 125.3, 123.8, 123.4, 111.2, 86.5. HRMS (ESI) calcd for C<sub>25</sub>H<sub>16</sub>NO<sub>3</sub> (M+H)<sup>+</sup>: 354.1125, found 354.1124.

1'-Benzyl-4'-chloro-3,4-diphenyl-5*H*-spiro[furan-2,3'-indoline]-2',5-dione (**3f**).

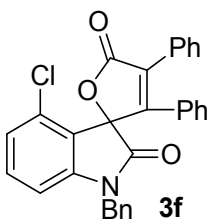

White solid, mp: 193-195 °C. <sup>1</sup>H NMR (300 MHz, CDCl<sub>3</sub>): δ 7.52 (d, *J* = 5.7 Hz, 2H), 7.35-7.30 (m, 4H), 7.23-7.16 (m, 6H), 7.03 (d, *J* = 8.2 Hz, 1H), 6.95 (d, *J* = 7.5 Hz, 2H), 6.87 (d, *J* = 7.1 Hz, 2H), 6.57 (d, *J* = 7.8 Hz, 1H), 5.11 and 4.59 (d×2, *J* = 15.8 Hz, 2H). <sup>13</sup>C NMR (125MHz, CDCl<sub>3</sub>): δ 171.1, 169.7, 154.6, 145.4, 134.0, 132.7, 132.6, 130.5, 130.2, 129.8, 129.3, 129.1, 129.1, 128.96, 128.9, 128.4, 127.83, 127.80, 126.8, 124.5,

119.8, 108.6, 86.0, 44.5. HRMS (ESI) calcd for C<sub>30</sub>H<sub>21</sub>ClNO<sub>3</sub> (M+H)<sup>+</sup>: 478.1204, found 478.1207.

1'-Benzyl-5'-fluoro-3,4-diphenyl-5*H*-spiro[furan-2,3'-indoline]-2',5-dione (**3g**). White

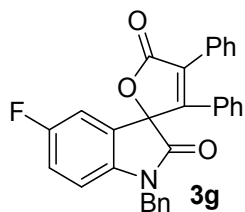

solid, mp: 191-192 °C. <sup>1</sup>H NMR (500 MHz, CDCl<sub>3</sub>): δ 7.51-7.52 (m, 2H), 7.29-7.35 (m, 4H), 7.23 (m, 1H), 7.16-7.20 (m, 4H), 7.12 (dd, *J* = 7.0, 2.5 Hz, 1H), 6.99 (td, *J* = 8.8, 2.4 Hz, 1H), 6.90 (d, *J* = 7.7 Hz, 2H), 6.85 (d, *J* = 7.4 Hz, 2H), 6.60 (dd, *J* = 8.6,

3.9 Hz, 1H), 5.12 and 4.56 (d×2, *J* = 15.8 Hz, 2H). <sup>13</sup>C NMR (125 MHz, CDCl<sub>3</sub>): δ 171.1, 170.1, 159.5 (d, *J* = 243.0 Hz, 1C), 156.0, 139.8, 134.1, 130.0, 129.9, 129.4, 129.3, 129.02, 128.9, 128.7, 128.4, 128.0, 127.8, 126.8, 124.6 (d, *J* = 7.9 Hz, 1C), 118.1 (d, *J* = 23.3 Hz, 1C), 112.9 (d, *J* = 24.8 Hz, 1C), 111.15 (d, *J* = 7.9 Hz, 1C), 86.1, 44.5. HRMS (ESI) calcd for C<sub>30</sub>H<sub>21</sub>FNO<sub>3</sub> (M+H)<sup>+</sup>: 462.1487, found 462.1494.

1'-Benzyl-5'-chloro-3,4-diphenyl-5*H*-spiro[furan-2,3'-indoline]-2',5-dione (**3h**).

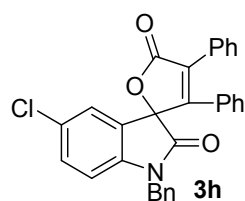

White solid, mp: 192-193 °C. <sup>1</sup>H NMR (500 MHz, CDCl<sub>3</sub>): δ 7.51 (d, *J* = 6.4 Hz, 2H), 7.36-7.29 (m, 5H), 7.27-7.20 (m, 2H), 7.15-7.19 (m, 4H), 6.89 (d, *J* = 7.6 Hz, 2H), 6.83 (d, *J* = 7.3 Hz, 2H), 6.59 (d, *J* = 8.4 Hz, 1H), 5.10 and 4.55 (d×2, *J* = 15.8 Hz,

2H). <sup>13</sup>C NMR (125 MHz, CDCl<sub>3</sub>): δ 171.0, 169.9, 155.8, 142.3, 134.0, 131.6, 130.0, 129.9, 129.38, 129.30, 129.27, 129.1, 128.9, 128.7, 128.4, 128.0, 127.9, 126.8, 125.3, 124.7, 111.3, 85.8, 44.5. HRMS (ESI) calcd for C<sub>30</sub>H<sub>21</sub>ClNO<sub>3</sub> (M+H)<sup>+</sup>: 478.1204, found 478.1201.

1'-Benzyl-5'-bromo-3,4-diphenyl-5*H*-spiro[furan-2,3'-indoline]-2',5-dione (**3i**).

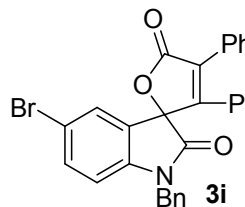

White solid, mp: 195-197 °C. <sup>1</sup>H NMR (500 MHz, CDCl<sub>3</sub>): δ 7.52 (d, *J* = 7.4 Hz, 2H), 7.48 (s, 1H), 7.41 (d, *J* = 8.3 Hz, 1H), 7.36-7.29 (m, 4H), 7.23 (m, 1H), 7.19-7.16 (m, 4H), 6.89 (d, *J* = 7.9 Hz, 2H), 6.83 (d, *J* = 7.4 Hz, 2H), 6.55 (d, *J* = 8.4 Hz, 1H),

5.11 and 4.55 (d×2, *J* = 15.8 Hz, 2H). <sup>13</sup>C NMR (125 MHz, CDCl<sub>3</sub>): δ 171.0, 169.8, 155.8, 142.8, 134.5, 133.9, 129.99, 129.97, 129.38, 129.31, 129.1, 128.9, 128.7, 128.4, 128.0, 127.9, 126.8, 125.1, 116.3, 111.8, 85.8, 44.5. HRMS (ESI) calcd for

$C_{30}H_{21}BrNO_3$  (M+H)<sup>+</sup>: 522.0699, found 522.0698.

1'-Benzyl-5'-methyl-3,4-diphenyl-5*H*-spiro[furan-2,3'-indoline]-2',5-dione (3j).

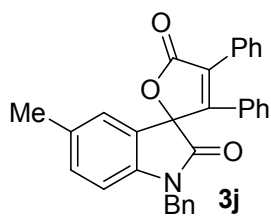

White solid, mp: 198-200 °C. <sup>1</sup>H NMR (500 MHz, CDCl<sub>3</sub>): δ 7.53 (dd, *J* = 7.3, 1.8 Hz, 2H), 7.34-7.29 (m, 4H), 7.23 -7.12 (m, 6H), 7.09 (d, *J* = 8.0 Hz, 1H), 6.88 (d, *J* = 7.8 Hz, 2H), 6.84 (d, *J* = 7.3 Hz, 2H), 6.56 (d, *J* = 8.0 Hz, 1H), 5.10 and

4.54 (d×2, *J* = 15.8 Hz, 2H), 2.33 (s, 3H). <sup>13</sup>C NMR (125 MHz, CDCl<sub>3</sub>): δ 171.5, 170.2, 156.6, 141.4, 134.6, 133.6, 131.9, 130.3, 129.8, 129.4, 129.1, 128.9, 128.74, 128.69, 128.4, 128.1, 127.6, 126.9, 125.5, 122.9, 110.1, 86.5, 44.3, 20.97. HRMS (ESI) calcd for C<sub>31</sub>H<sub>24</sub>NO<sub>3</sub> (M+H)<sup>+</sup>: 458.1751, found 458.1752.

1'-Benzyl-5'-methoxy-3,4-diphenyl-5*H*-spiro[furan-2,3'-indoline]-2',5-dione (3k).

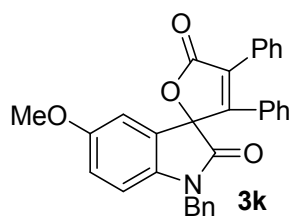

White solid, mp: 172-173 °C. <sup>1</sup>H NMR (500 MHz, CDCl<sub>3</sub>): δ 7.52 (dd, *J* = 7.5, 1.7 Hz, 2H), 7.36-7.28 (m, 4H), 7.21 (t, *J* = 7.2 Hz, 1H), 7.18-7.14 (m, 4H), 6.95 (d, *J* = 2.5 Hz, 1H), 6.88 (d, *J* = 7.4 Hz, 2H), 6.83-6.80 (m, 3H), 6.57 (d, *J* = 8.6 Hz, 1H), 5.11 and 4.52 (d×2, *J* = 15.8 Hz, 2H), 3.77 (s, 3H).

<sup>13</sup>C NMR (125 MHz, CDCl<sub>3</sub>): δ 171.4, 167.0, 156.7, 156.5, 137.1, 134.5, 130.2, 129.8, 129.4, 129.1, 129.0, 128.9, 128.74, 128.71, 128.4, 128.1, 127.6, 126.8, 124.1, 116.5, 111.5, 110.9, 86.6, 55.9, 44.4. HRMS (ESI) calcd for C<sub>31</sub>H<sub>24</sub>NO<sub>4</sub> (M+H)<sup>+</sup>: 474.1700, found 474.1700.

1'-Benzyl-6'-chloro-3,4-diphenyl-5*H*-spiro[furan-2,3'-indoline]-2',5-dione (3l).

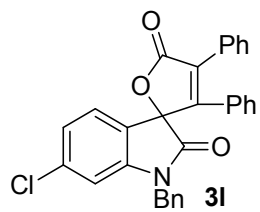

White solid, mp: 166-167 °C. <sup>1</sup>H NMR (500 MHz, CDCl<sub>3</sub>): δ 7.50 (d, *J* = 6.4 Hz, 2H), 7.35-7.27 (m, 5H), 7.23-7.14 (m, 5H), 7.10 (d, *J* = 7.5 Hz, 1H), 6.86 (dd, *J* = 12.7, 7.6 Hz, 4H), 6.67 (s, 1H), 5.09 and 4.54 (d×2, *J* = 15.8 Hz, 2H). <sup>13</sup>C NMR (125 MHz,

CDCl<sub>3</sub>): δ 171.1, 170.3, 155.9, 145.0, 137.5, 133.9, 130.1, 129.9, 129.4, 129.3, 129.05, 129.0, 128.9, 128.8, 128.4, 127.98, 127.90, 126.8, 125.9, 123.8, 121.4, 110.9, 85.7, 44.5. HRMS (ESI) calcd for, found. HRMS (ESI) calcd for C<sub>30</sub>H<sub>21</sub>ClNO<sub>3</sub> (M+H)<sup>+</sup>: 478.1204,, found 478.1199.

1'-Benzyl-6'-bromo-3,4-diphenyl-5*H*-spiro[furan-2,3'-indoline]-2',5-dione (**3m**).

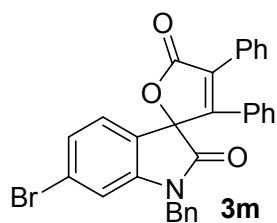

White solid, mp: 195-197 °C. <sup>1</sup>H NMR (500 MHz, CDCl<sub>3</sub>): δ 7.51 (d, *J* = 6.4 Hz, 2H), 7.35-7.28 (m, 5H), 7.24-7.156 (m, 6H), 6.89-6.83 (m, 5H), 5.10 and 4.55 (d×2, *J* = 15.9 Hz, 2H). <sup>13</sup>C NMR (125 MHz, CDCl<sub>3</sub>): δ 171.1, 170.2, 155.9, 145.1, 133.9, 130.1, 129.9, 129.4, 129.3, 129.1, 129.0, 128.9, 128.8, 128.4, 128.0, 127.9, 126.8, 126.7, 126.2, 125.4, 121.95, 113.7, 85.7, 44.5. HRMS (ESI) calcd for, found.

1'-Benzyl-7'-chloro-3,4-diphenyl-5*H*-spiro[furan-2,3'-indoline]-2',5-dione (**3n**).

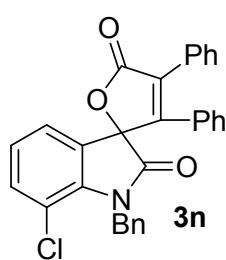

White solid, mp: 178-179 °C. <sup>1</sup>H NMR (500 MHz, CDCl<sub>3</sub>): δ 7.50 (d, *J* = 6.5 Hz, 2H), 7.39-7.27 (m, 6H), 7.23-7.12 (m, 5H), 7.09 (t, *J* = 7.8 Hz, 1H), 6.88 (d, *J* = 7.7 Hz, 2H), 6.83 (d, *J* = 7.3 Hz, 2H), 5.31 and 5.26 (d×2, *J* = 6.5 Hz, 2H). <sup>13</sup>C NMR (125 MHz, CDCl<sub>3</sub>): δ 171.1, 170.8, 156.0, 140.1, 136.2, 134.2, 130.02, 129.98, 129.4, 129.3, 129.1, 128.7, 128.6, 128.4, 128.0, 127.2, 126.1, 125.8, 124.6, 123.7, 116.5, 85.3, 45.5. HRMS (ESI) calcd for C<sub>30</sub>H<sub>21</sub>ClNO<sub>3</sub> (M+H)<sup>+</sup>: 478.1204,, found 478.1200.

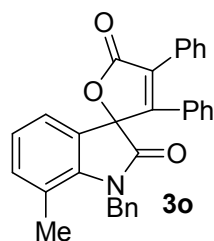

1'-Benzyl-7'-methyl-3,4-diphenyl-5*H*-spiro[furan-2,3'-indoline]-2',5-dione (**3o**). White solid, mp: 196-197 °C. <sup>1</sup>H NMR (500 MHz, CDCl<sub>3</sub>): δ 7.52 (d, *J* = 6.1 Hz, 2H), 7.36 (t, *J* = 7.5 Hz, 1H), 7.31-7.28 (m, 3H), 7.26 (m, 1H), 7.22 (t, *J* = 7.7 Hz, 2H), 7.17 (t, *J* = 7.0 Hz, 1H), 7.13 (t, *J* = 7.3 Hz, 2H), 7.10-7.05 (m, 2H), 6.91 (d, *J* = 7.7 Hz, 2H), 6.66 (d, *J* = 7.4 Hz, 2H), 5.28 and 4.92 (d×2, *J* = 17.0 Hz, 1H), 2.19 (s, 3H). <sup>13</sup>C NMR (125 MHz, CDCl<sub>3</sub>): δ 171.5, 171.2, 156.7, 142.0, 136.4, 135.6, 130.5, 129.8, 129.4, 129.1, 129.0, 128.8, 128.34, 128.27, 127.2, 125.3, 123.8, 123.4, 123.0, 121.1, 85.9, 45.6, 18.5. HRMS (ESI) calcd for C<sub>31</sub>H<sub>24</sub>NO<sub>3</sub> (M+H)<sup>+</sup>: 458.1751, found 458.1747.

1'-Benzyl-3,4-bis(4-fluorophenyl)-5*H*-spiro[furan-2,3'-indoline]-2',5-dione (**3q**).

White solid, mp: 190-191 °C. <sup>1</sup>H NMR (500 MHz, CDCl<sub>3</sub>): δ 7.50 (dd, *J* = 8.7, 5.4 Hz, 2H), 7.35 (d, *J* = 7.6 Hz, 1H), 7.32 (d, *J* = 8.0 Hz, 1H), 7.24 (d, *J* = 7.2 Hz, 1H), 7.19 (t, *J* = 7.4 Hz, 2H), 7.15 (t, *J* = 7.5 Hz, 1H), 7.02 (t, *J* = 8.7 Hz, 2H), 6.87-6.79 (m,



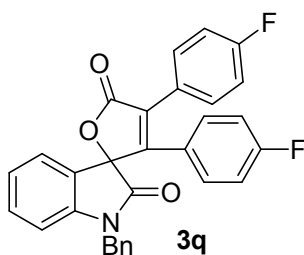

6H), 6.73 (d,  $J = 7.9$  Hz, 1H), 5.12 and 4.55 (d $\times$ 2,  $J = 15.7$  Hz, 2H).  $^{13}\text{C}$  NMR (125 MHz,  $\text{CDCl}_3$ ):  $\delta$  171.2, 170.1, 163.5 (d,  $J = 249.9$  Hz, 1C), 163.1 (d,  $J = 249.0$  Hz, 1C), 155.2, 143.8, 134.4, 131.8, 131.4 (d,  $J = 8.5$  Hz, 1C), 130.2 (d,  $J = 8.3$  Hz, 1C), 128.8, 128.0, 127.9, 126.9, 126.1 (d,  $J = 3.2$  Hz, 1C), 124.9, 124.8 (d,  $J = 3.3$  Hz, 1C), 123.9, 122.6, 116.4 (d,  $J = 21.5$  Hz, 1C), 115.7 (d,  $J = 21.6$  Hz, 1C), 110.4, 86.3, 44.4. HRMS (ESI) calcd for  $\text{C}_{30}\text{H}_{20}\text{F}_2\text{NO}_3$  ( $\text{M}+\text{H}$ ) $^+$ : 480.1406, found 480.1406.

1'-Benzyl-3,4-bis(4-chlorophenyl)-5H-spiro[furan-2,3'-indoline]-2',5-dione (**3r**).

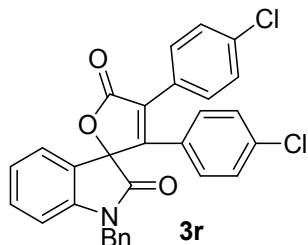

White solid, mp: 213-214 °C.  $^1\text{H}$  NMR (500 MHz,  $\text{CDCl}_3$ ):  $\delta$  7.45 (d,  $J = 8.5$  Hz, 2H), 7.36-7.31 (m, 2H), 7.30 (d,  $J = 8.5$  Hz, 2H), 7.26-7.22 (m, 1H), 7.20 (t,  $J = 7.3$  Hz, 2H), 7.16-7.11 (m 3H), 6.82 (d,  $J = 7.3$  Hz, 2H), 6.73 (t,  $J = 8.8$  Hz, 3H), 5.12 and 4.52 (d $\times$ 2,  $J = 15.7$  Hz, 2H).  $^{13}\text{C}$  NMR (125 MHz,  $\text{CDCl}_3$ ):  $\delta$  170.8, 169.9, 155.5, 143.8, 136.4, 135.6, 134.3, 131.9, 130.6, 129.5, 129.4, 128.9, 128.8, 128.4, 128.1, 127.9, 127.1, 126.9, 124.9, 123.9, 122.3, 110.4, 86.2, 44.4. HRMS (ESI) calcd for  $\text{C}_{30}\text{H}_{20}\text{Cl}_2\text{NO}_3$  ( $\text{M}+\text{H}$ ) $^+$ : 512.0815, found 512.0811.

1'-Benzyl-3,4-bis(4-bromophenyl)-5H-spiro[furan-2,3'-indoline]-2',5-dione (**3s**).

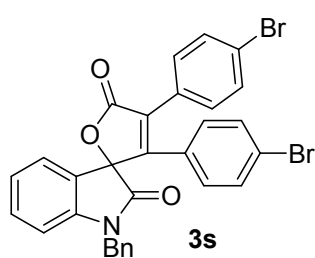

White solid, mp: 219-220 °C.  $^1\text{H}$  NMR (500 MHz,  $\text{CDCl}_3$ ):  $\delta$  7.46 (d,  $J = 8.5$  Hz, 2H), 7.40-7.31 (m, 4H), 7.29-7.24 (m, 3H), 7.21 (t,  $J = 7.2$  Hz, 2H), 7.15 (t,  $J = 7.5$  Hz, 1H), 6.82 (d,  $J = 7.3$  Hz, 2H), 6.72 (d,  $J = 7.9$  Hz, 1H), 6.67 (d,  $J = 8.4$  Hz, 2H), 5.13 and 4.52 (d $\times$ 2,  $J = 15.7$  Hz, 2H).  $^{13}\text{C}$  NMR (125 MHz,  $\text{CDCl}_3$ ):  $\delta$  170.8, 169.9, 155.6, 143.8, 134.3, 132.4, 131.9, 131.9, 130.9, 129.6, 128.8, 128.2, 127.9, 127.5, 126.9, 124.9, 124.7, 123.95, 123.91, 122.3, 110.5, 86.2, 44.4. HRMS (ESI) calcd for  $\text{C}_{30}\text{H}_{20}\text{Br}_2\text{NO}_3$  ( $\text{M}+\text{H}$ ) $^+$ : 599.9804, found 599.9802.

1'-Benzyl-3,4-di-p-tolyl-5H-spiro[furan-2,3'-indoline]-2',5-dione (**3t**). White solid, mp: 204-205 °C.  $^1\text{H}$  NMR (300 MHz,  $\text{CDCl}_3$ ):  $\delta$  7.43 (d,  $J = 8.2$  Hz, 2H), 7.36-7.29

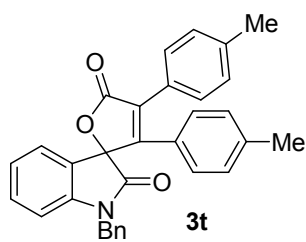

(m, 2H), 7.25-7.06 (m, 6H), 6.99-6.86 (m, 4H), 6.75 (d,  $J = 8.1$  Hz, 2H), 6.68 (d,  $J = 7.9$  Hz, 1H), 5.12 and 4.56 (d $\times$ 2,  $J = 15.8$  Hz, 2H), 2.33 (s, 3H), 2.29 (s, 3H).  $^{13}\text{C}$  NMR (125 MHz,  $\text{CDCl}_3$ ):  $\delta$  171.8, 170.5, 155.8, 143.8, 139.8, 139.1, 134.5, 131.5, 129.6, 129.2, 129.1, 128.8, 128.6, 127.9, 127.6, 127.4, 126.9, 126.2, 124.9, 123.7, 123.2, 110.2, 86.2, 44.3, 21.37. HRMS (ESI) calcd for  $\text{C}_{32}\text{H}_{26}\text{NO}_3$  ( $\text{M}+\text{H}$ ) $^+$ : 472.1907, found 472.1902.

1'-Benzyl-4,5-diphenyl-3H-spiro[furan-2,3'-indoline]-2',3-dione (**4a**). White solid,

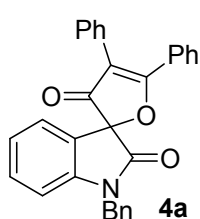

mp: 193-194 °C.  $^1\text{H}$  NMR (300 MHz,  $\text{CDCl}_3$ ):  $\delta$  7.76-7.79 (m, 2H), 7.52 (t,  $J = 7.5$  Hz, 1H), 7.24-7.41 (m, 14H), 7.06 (t,  $J = 7.5$  Hz, 1H), 6.77 (d,  $J = 7.8$  Hz, 1H), 5.13 and 4.84 (2 $\times$ d,  $J = 15.9$  Hz, 2H).  $^{13}\text{C}$  NMR (75MHz,  $\text{CDCl}_3$ ):  $\delta$  196.1, 182.3, 169.2, 144.4, 134.7,

132.5, 131.1, 129.7, 129.0, 128.95, 128.91, 128.8, 128.7, 128.5, 128.1, 127.8, 127.1, 124.2, 123.9, 123.4, 115.5, 110.3, 87.9, 44.3. HRMS (ESI) calcd for  $\text{C}_{30}\text{H}_{22}\text{NO}_3$  ( $\text{M}+\text{H}$ ) $^+$ : 444.1594, found 444.1597.

1'-Benzyl-5'-chloro-4,5-diphenyl-3H-spiro[furan-2,3'-indoline]-2',3-dione (**4h**).

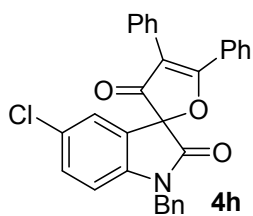

White solid, mp: 238-239 °C.  $^1\text{H}$  NMR (300 MHz,  $\text{CDCl}_3$ ):  $\delta$  7.80 (d,  $J = 7.5$  Hz, 2H), 7.55 (t,  $J = 7.2$  Hz, 1H), 7.44-7.38 (m, 11H), 7.35-7.27 (m, 3H), 6.71 (d,  $J = 9.0$  Hz, 1H), 5.14 and 4.83 (2 $\times$ d,  $J = 15.9$  Hz, 2H).  $^{13}\text{C}$  NMR (125 MHz,  $\text{CDCl}_3$ ):  $\delta$

195.5, 182.4, 168.8, 142.9, 134.2, 132.7, 130.9, 129.7, 129.0, 128.84, 128.83, 128.76, 128.68, 128.59, 128.3, 127.9, 127.1, 125.6, 124.3, 115.4, 111.3, 87.5, 44.4. HRMS (ESI) calcd for  $\text{C}_{30}\text{H}_{21}\text{ClNO}_3$  ( $\text{M}+\text{H}$ ) $^+$ : 478.1204, found 478.1210.

1'-Benzyl-5'-methoxy-4,5-diphenyl-3H-spiro[furan-2,3'-indoline]-2',3-dione (**4k**).

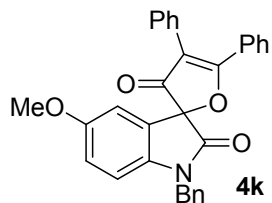

White solid, mp: 229-230 °C.  $^1\text{H}$  NMR (300 MHz,  $\text{CDCl}_3$ ):  $\delta$  7.79 (d,  $J = 7.4$  Hz, 2H), 7.52 (t,  $J = 7.5$  Hz, 1H), 7.44-7.33 (m, 11H), 7.28 (t,  $J = 7.1$  Hz, 1H), 6.84 (d,  $J = 2.4$  Hz, 1H), 6.80 (dd,  $J = 8.6, 2.5$  Hz, 1H), 6.66 (d,  $J = 8.6$  Hz, 1H), 5.10 and

4.80 (2 $\times$ d,  $J = 15.9$  Hz, 2H), 3.73 (s, 3H).  $^{13}\text{C}$  NMR (75 MHz,  $\text{CDCl}_3$ ):  $\delta$  196.1, 182.2,

168.9, 156.4, 137.5, 134.7, 132.5, 129.6, 128.92, 128.89, 128.85, 128.7, 128.6, 128.5, 128.1, 127.7, 127.1, 125.1, 115.6, 110.9, 110.8, 88.2, 55.8, 44.3. HRMS (ESI) calcd for  $C_{31}H_{24}NO_4$  ( $M+H$ )<sup>+</sup>: 474.1700, found 474.1709.

1'-Benzyl-4',6'-dimethyl-4,5-diphenyl-3*H*-spiro[furan-2,3'-indoline]-2',3-dione (**4p**).

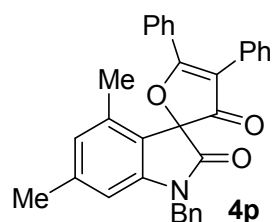

White solid, mp: 176-178 °C. <sup>1</sup>H NMR (500 MHz, CDCl<sub>3</sub>): δ 7.75 (d, *J* = 7.6 Hz, 2H), 7.50 (t, *J* = 7.1 Hz, 1H), 7.43-7.33 (m, 11H), 7.28 (d, *J* = 6.5 Hz, 1H), 6.68 (s, 1H), 6.43 (s, 1H), 5.06 and 4.81 (2×d, *J* = 15.9 Hz, 2H), 2.26 (s, 3H), 2.16 (s, 3H). <sup>13</sup>C NMR (125 MHz, CDCl<sub>3</sub>): δ 196.3, 181.3, 169.4, 144.8, 141.5, 135.9, 135.0, 132.4, 129.7, 129.2, 129.1, 128.9, 128.8, 128.6, 128.1, 127.7, 127.0, 126.03, 126.02, 119.5, 116.8, 108.6, 88.5, 44.2, 21.9, 17.5. HRMS (ESI) calcd for  $C_{32}H_{26}NO_3$  ( $M+H$ )<sup>+</sup>: 472.1907, found 472.1910.

1'-Benzyl-4,5-bis(4-chlorophenyl)-3*H*-spiro[furan-2,3'-indoline]-2',3-dione (**4r**).

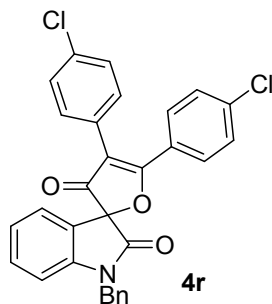

White solid, mp: 251-252 °C. <sup>1</sup>H NMR (300 MHz, CDCl<sub>3</sub>): δ 7.71 (d, *J* = 8.7 Hz, 2H), 7.41-7.22 (m, 13H), 7.07 (t, *J* = 7.5 Hz, 1H), 6.78 (d, *J* = 7.8 Hz, 1H), 5.10 and 4.83 (2×d, *J* = 15.9 Hz, 2H). <sup>13</sup>C NMR (125 MHz, CDCl<sub>3</sub>): δ 195.6, 181.1, 168.9, 144.4, 139.2, 134.6, 134.4, 131.3, 130.9, 129.9, 129.2, 129.1, 128.9, 127.9, 127.15, 127.13, 127.10, 124.0, 123.8, 123.5, 114.6, 110.4, 88.2, 44.4. HRMS (ESI) calcd for  $C_{30}H_{20}Cl_2NO_3$  ( $M+H$ )<sup>+</sup>: 512.0815, found 512.0815.

1'-Benzyl-4,5-di-*p*-tolyl-3*H*-spiro[furan-2,3'-indoline]-2',3-dione (**4t**). White solid,

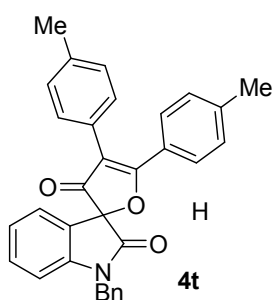

mp: 202-203 °C. <sup>1</sup>H NMR (300 MHz, CDCl<sub>3</sub>): δ 7.68 (d, *J* = 8.0 Hz, 2H), 7.40-7.16 (m, 13H), 7.03 (t, *J* = 7.5 Hz, 1H), 6.74 (d, *J* = 7.7 Hz, 1H), 5.10 and 4.81 (2×d, *J* = 15.9 Hz, 2H). <sup>13</sup>C NMR (125 MHz, CDCl<sub>3</sub>): δ 196.2, 182.1, 169.4, 144.3, 143.3, 137.8, 134.7, 130.9, 129.54, 129.47, 129.2, 128.9, 128.6, 127.7, 127.1, 126.3, 126.1, 124.4, 123.8, 123.3, 114.8, 110.2, 87.8, 44.2, 21.7, 21.3. HRMS (ESI) calcd for  $C_{32}H_{26}NO_3$  ( $M+H$ )<sup>+</sup>: 472.1907, found 472.1914.

**Reference:**

- [1] C. M. Vanos, T. H. Lambert, *Angew. Chem. Int. Ed.* **2011**, *50*, 12222.

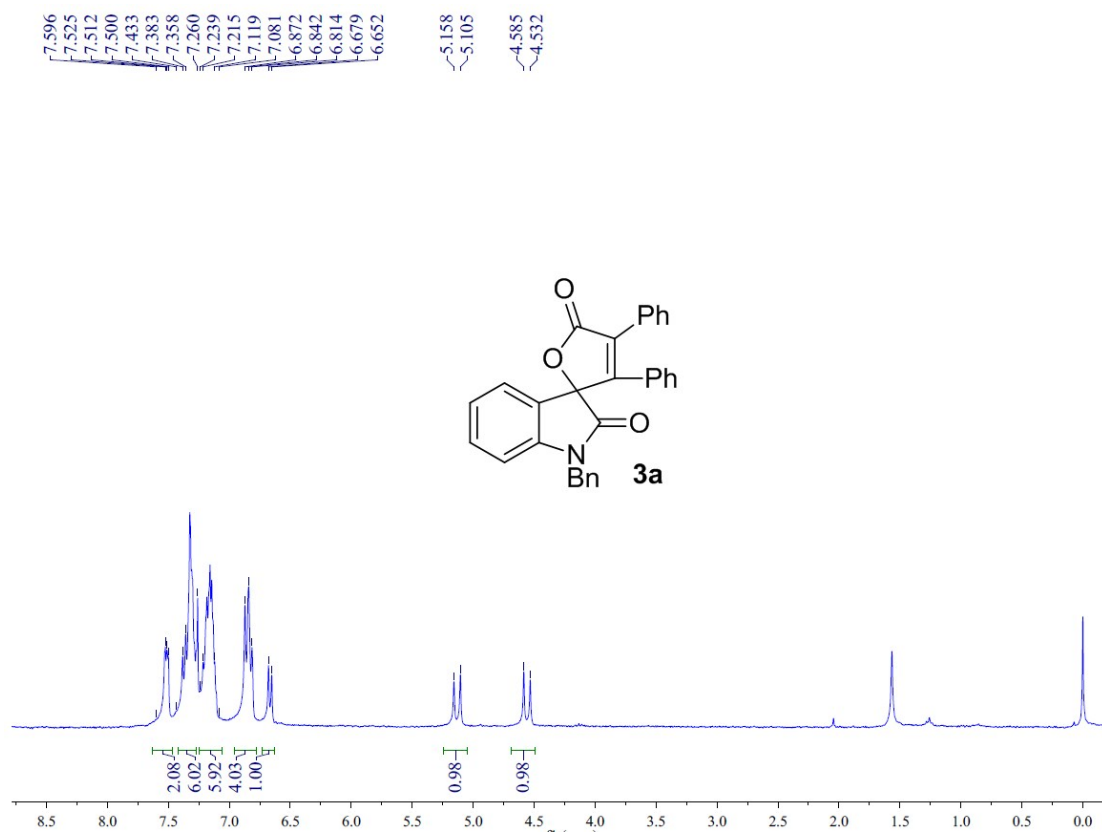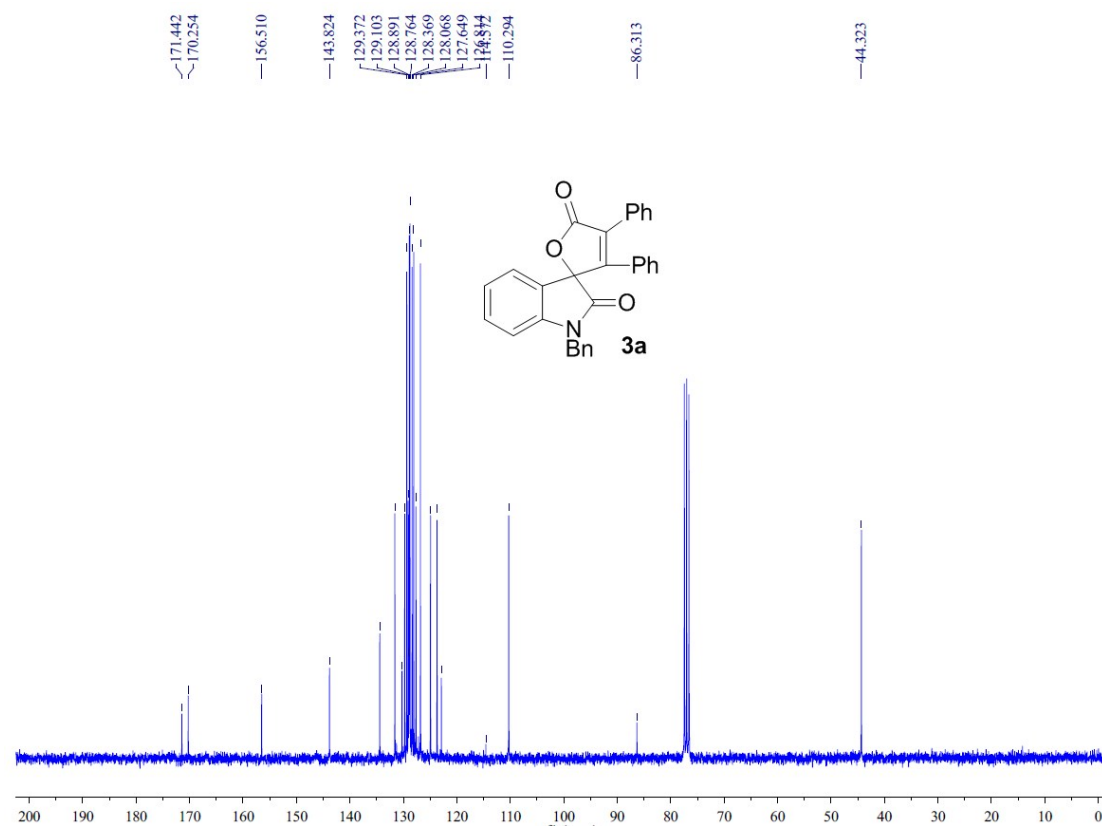

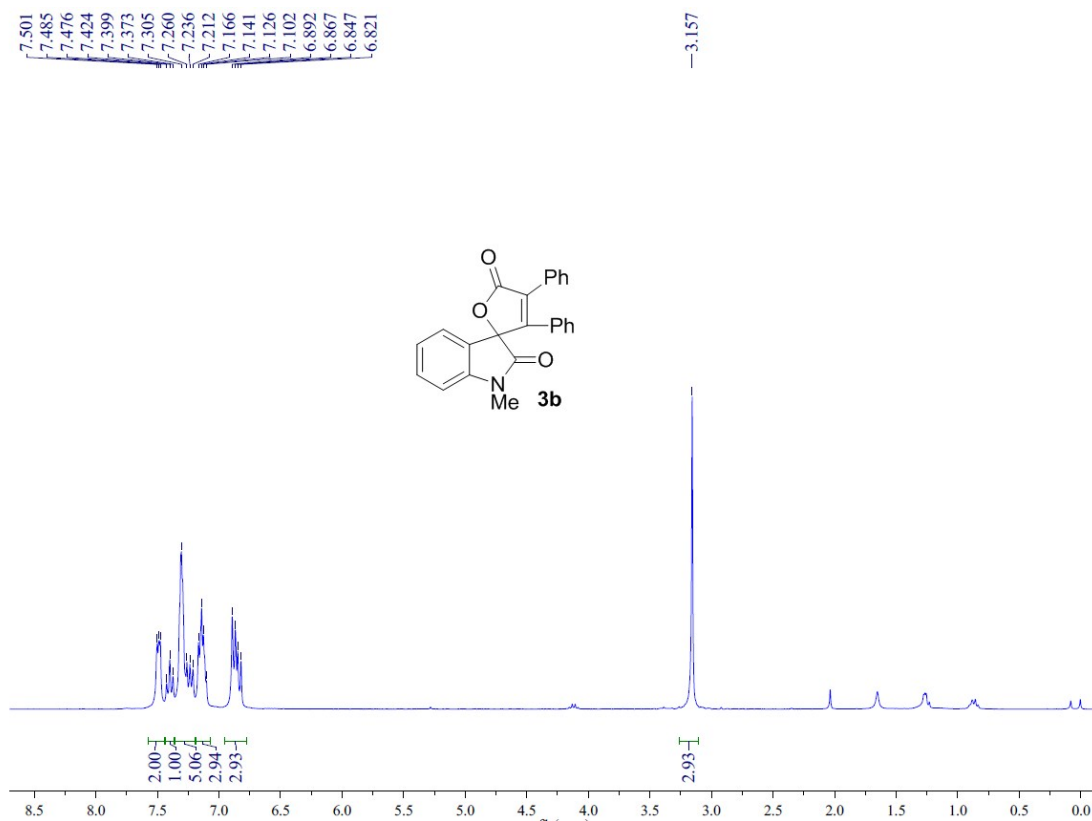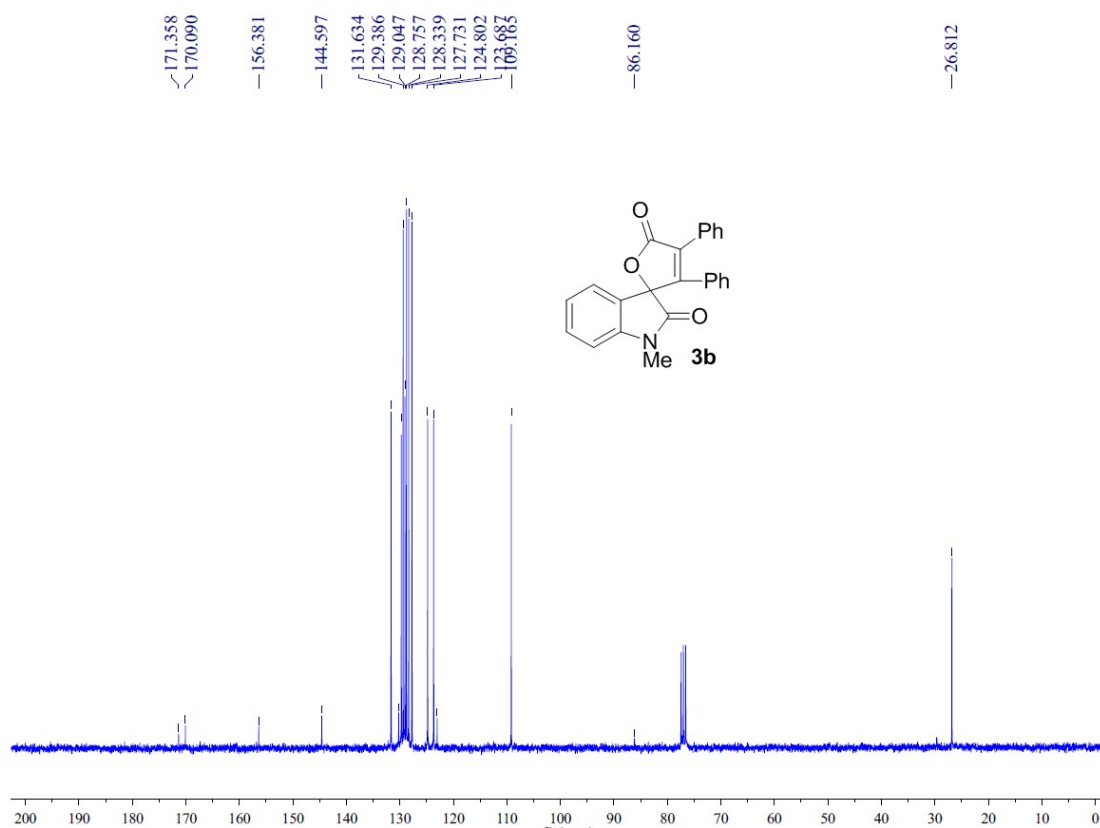

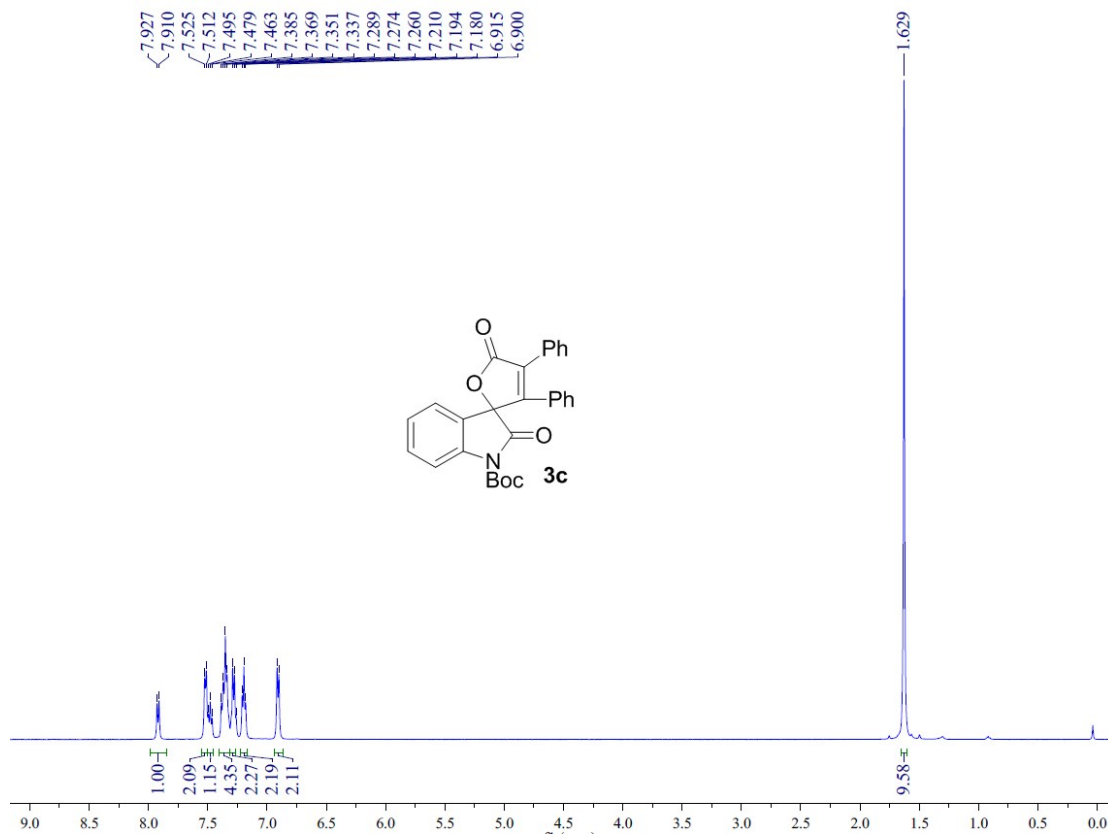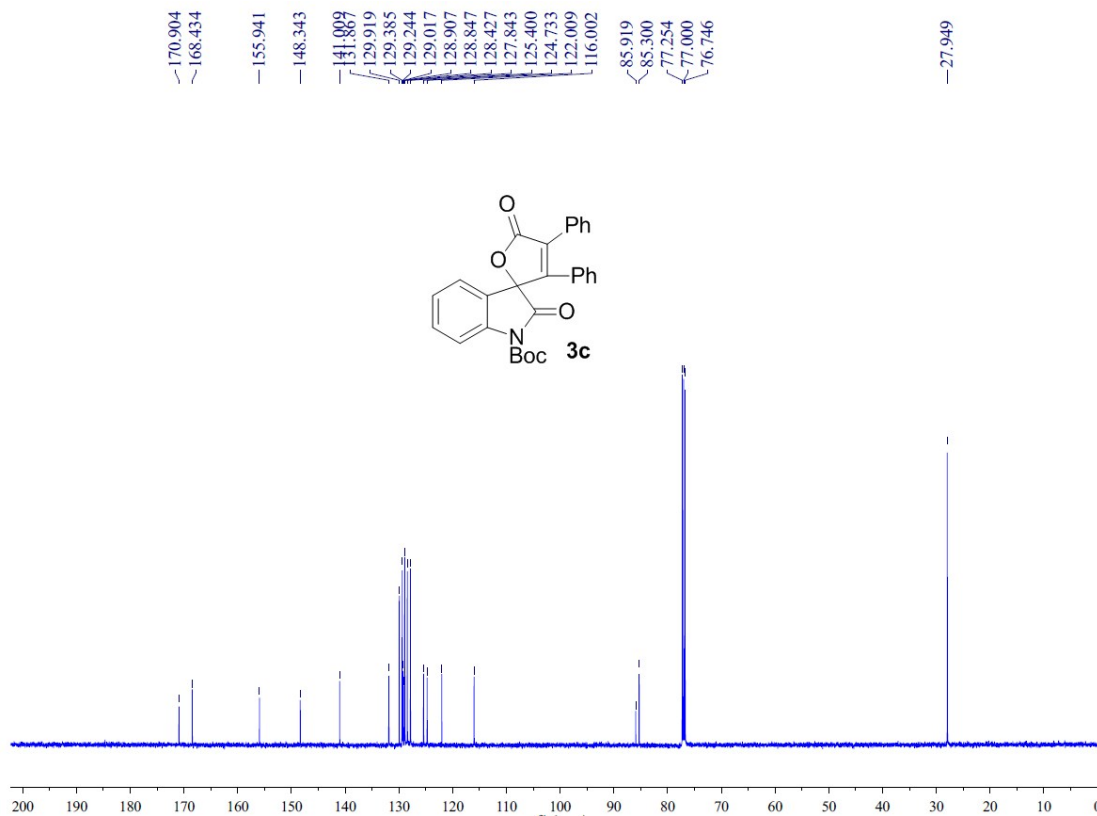

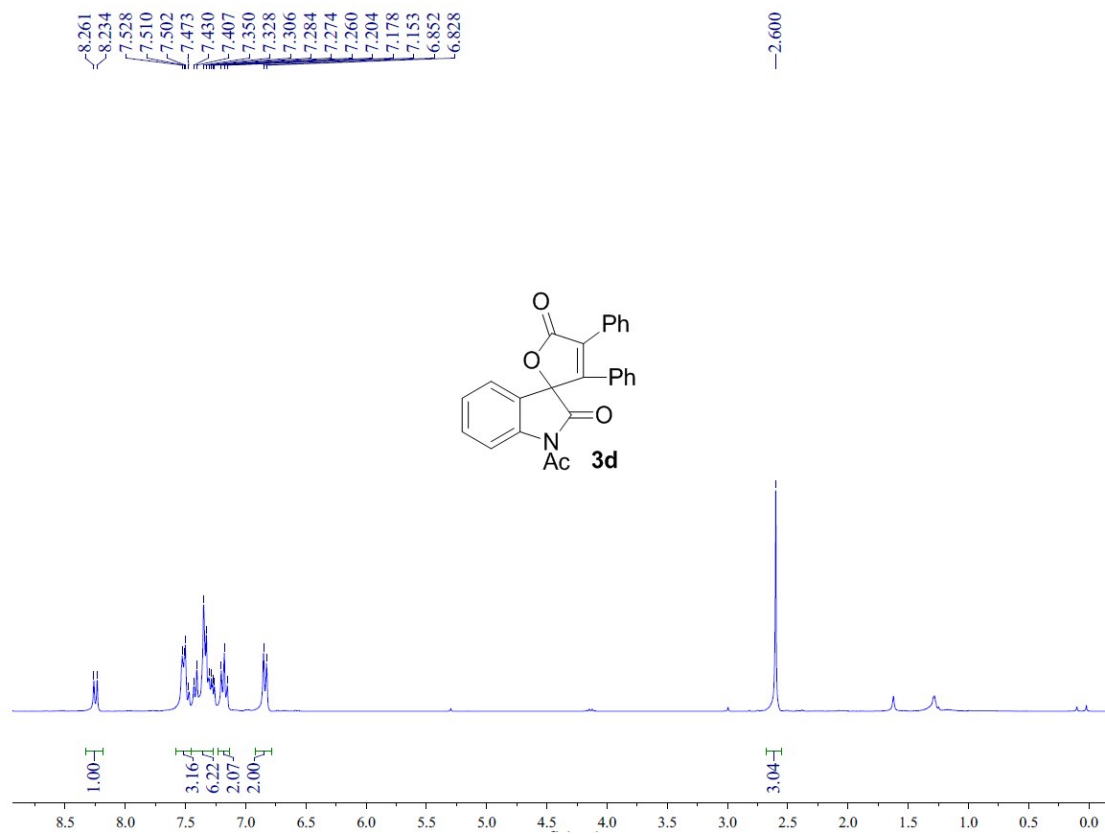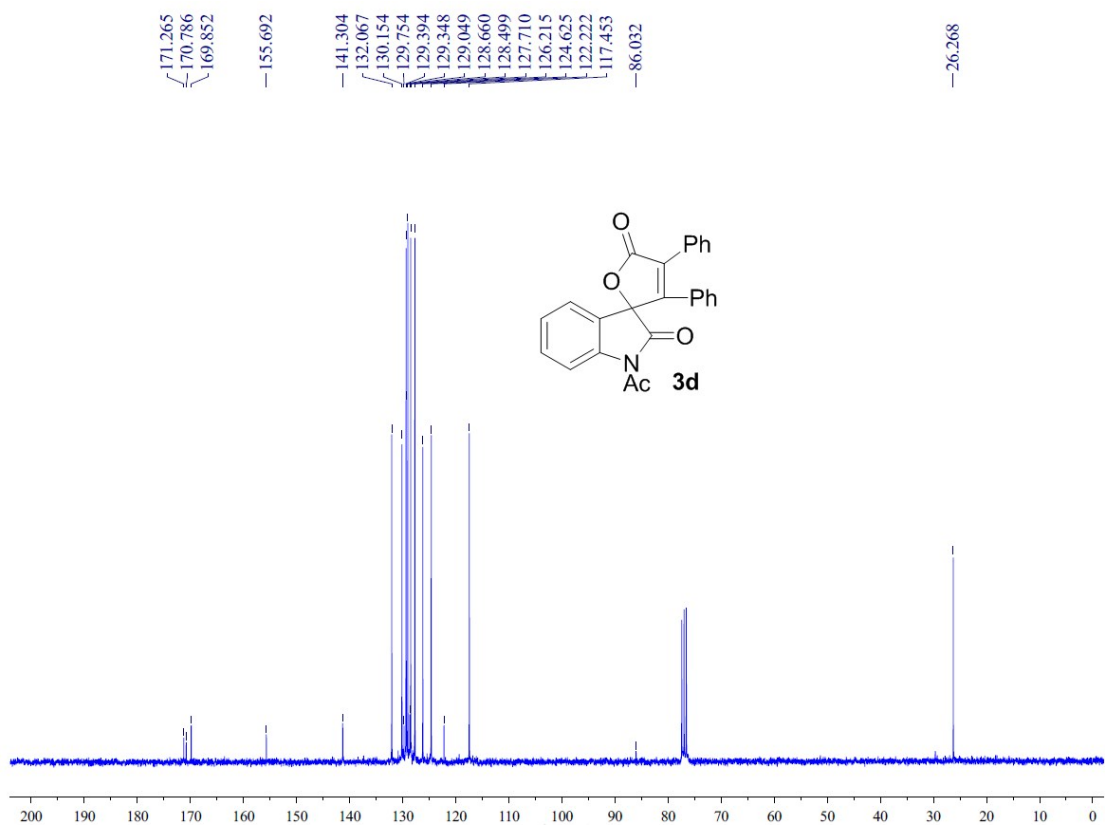



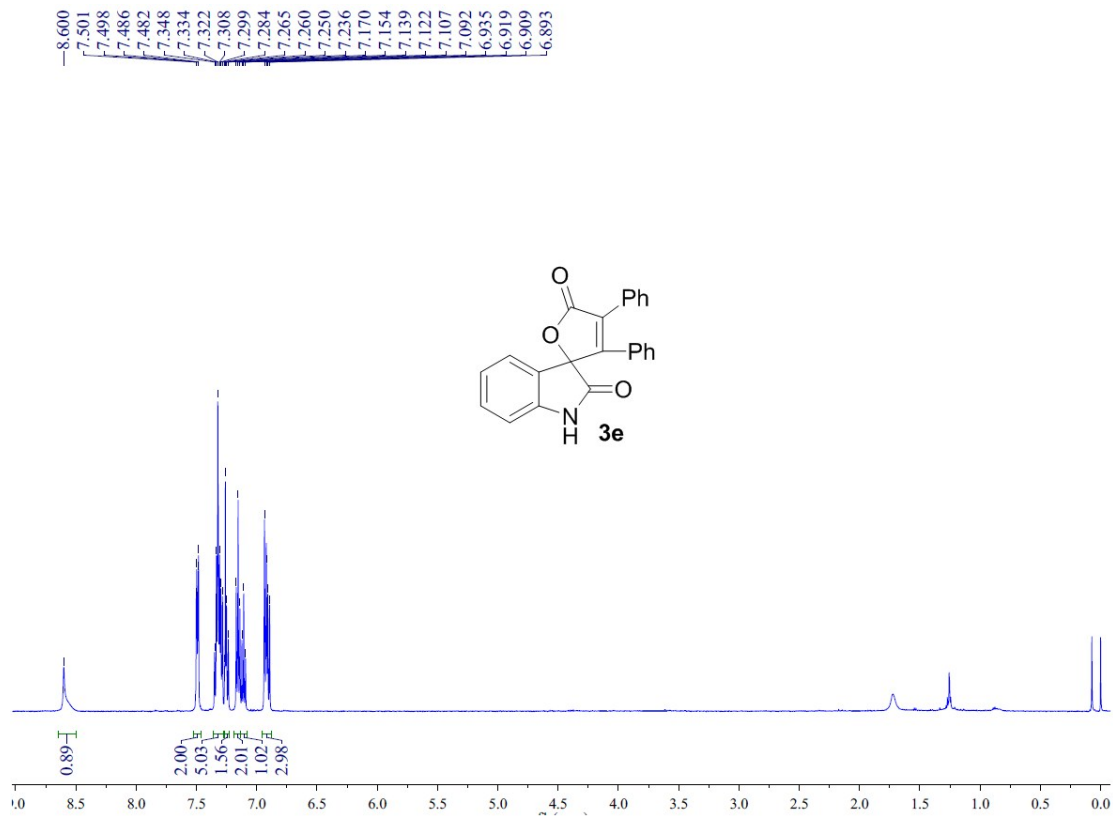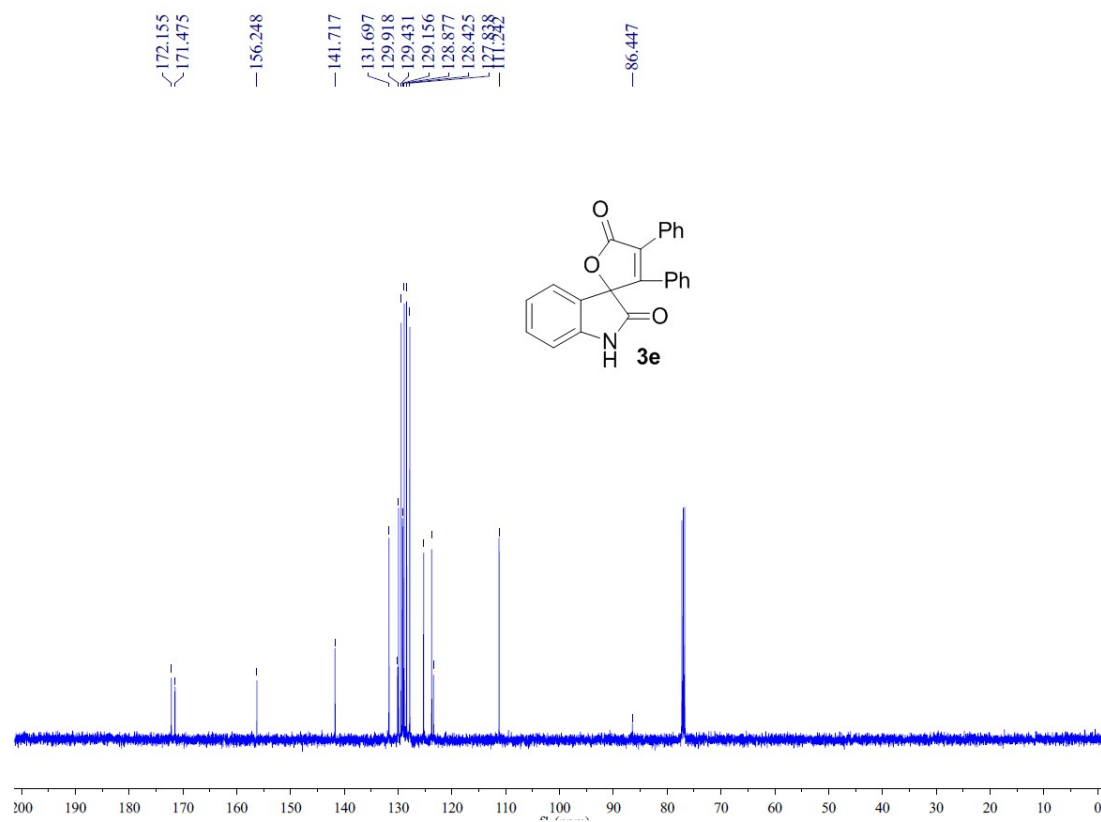

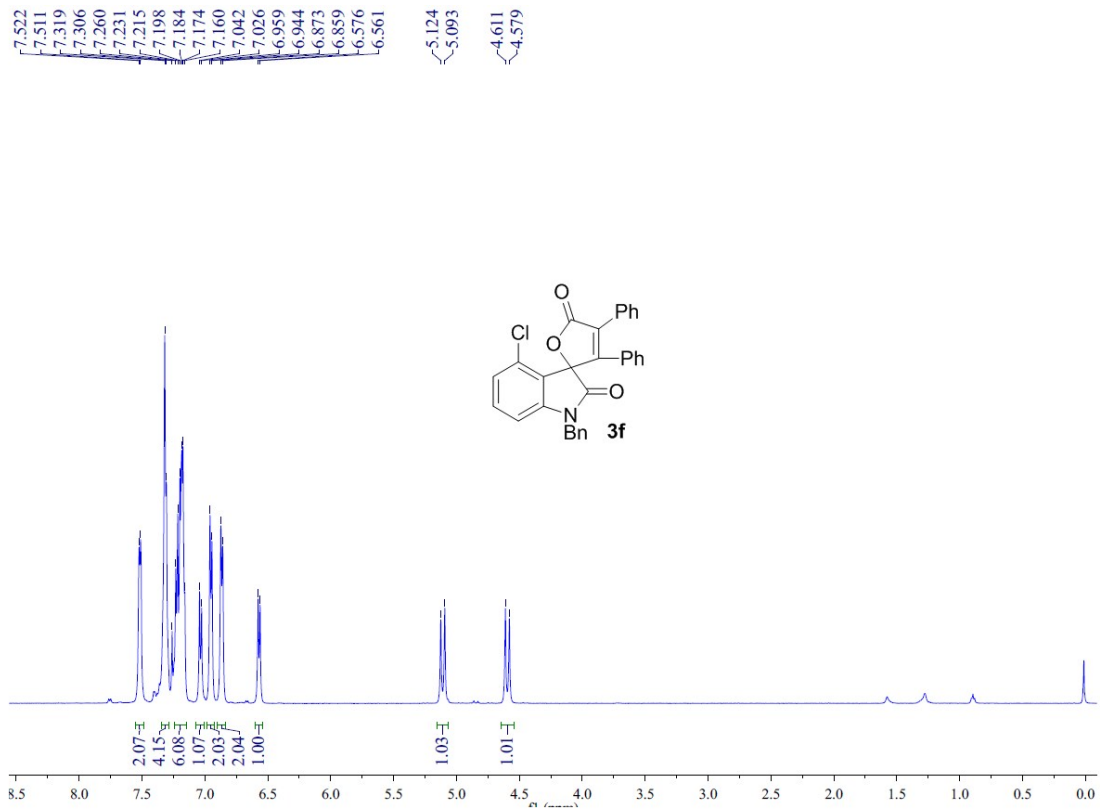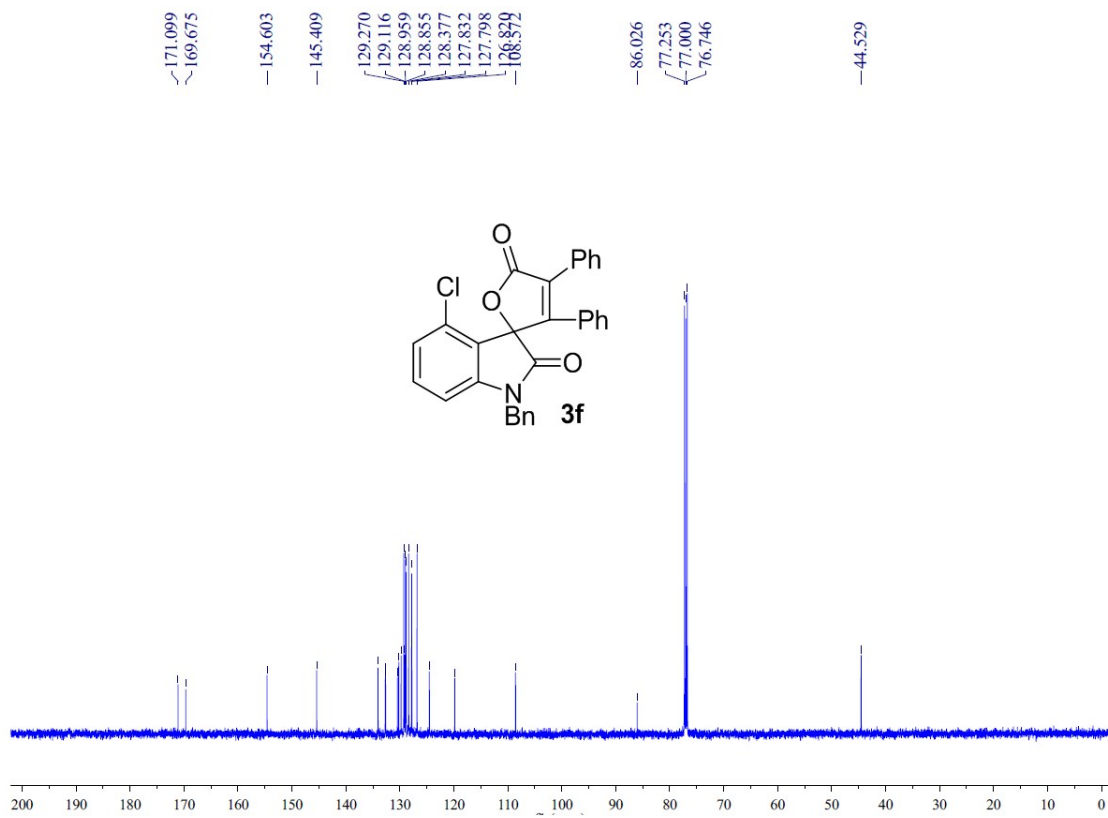

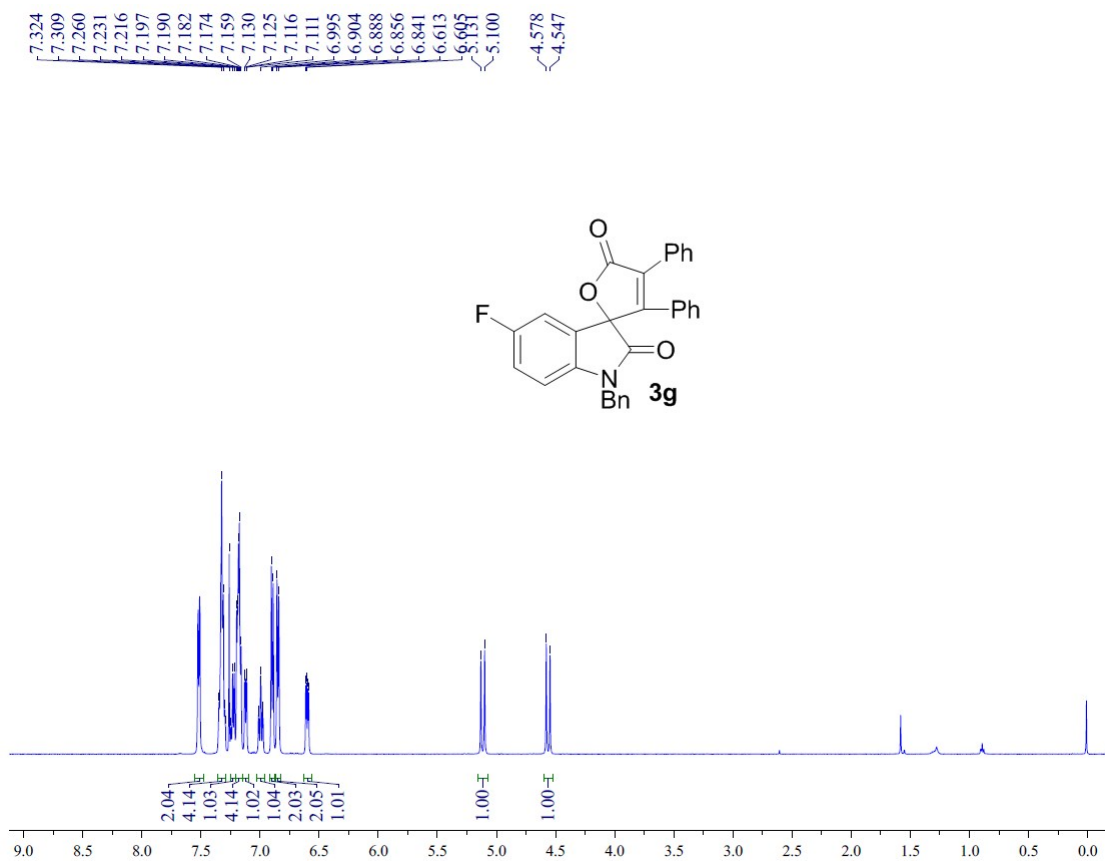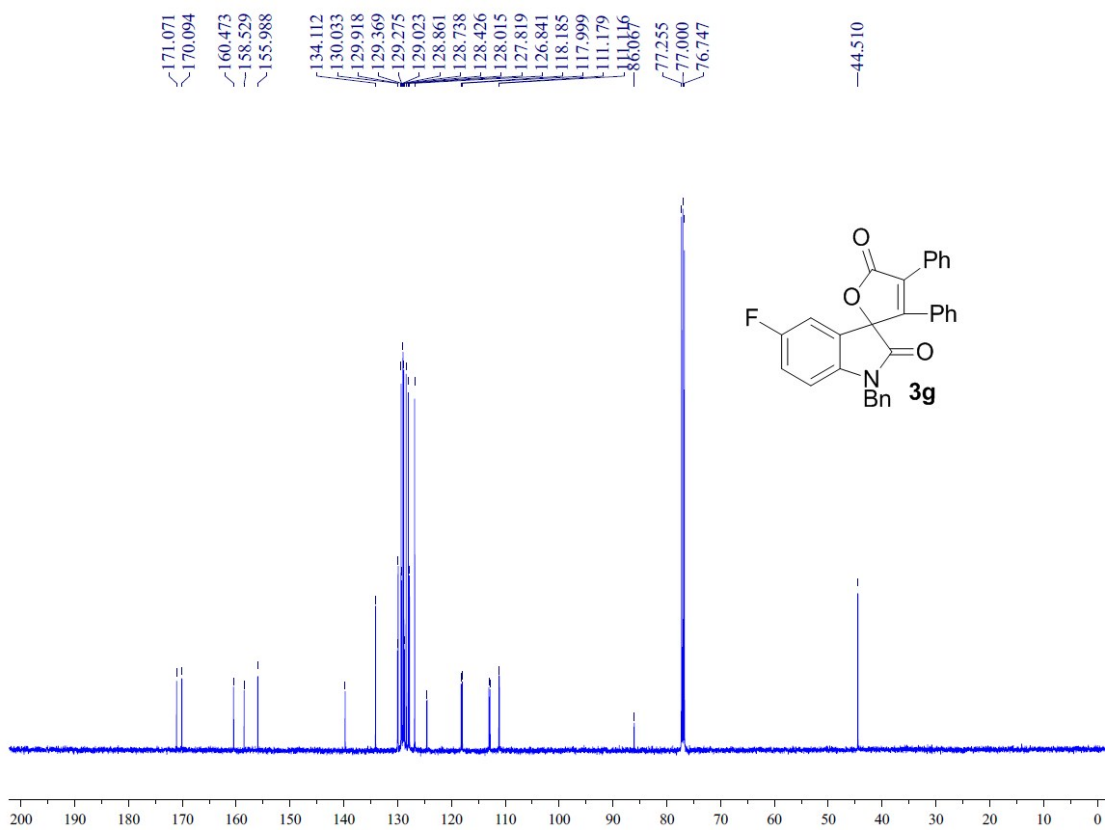

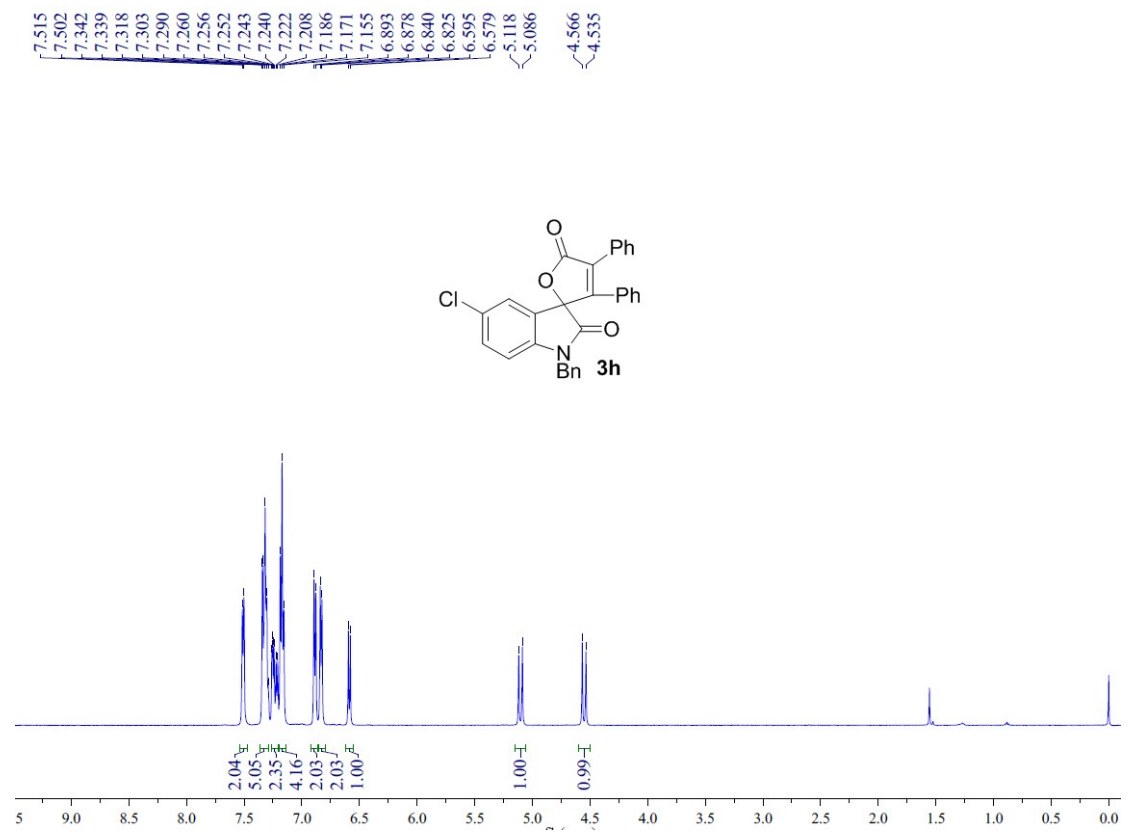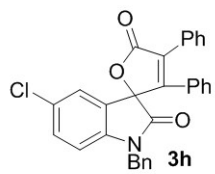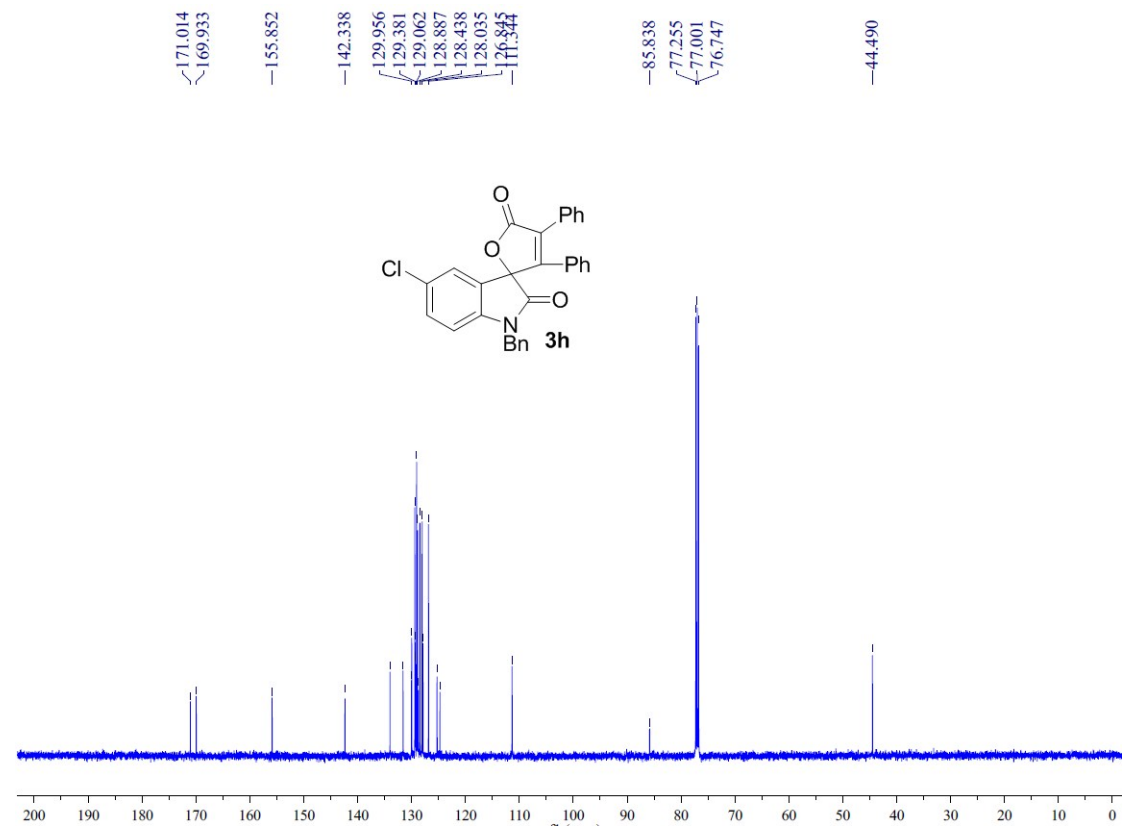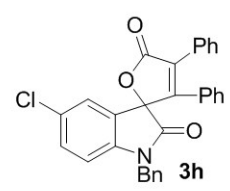

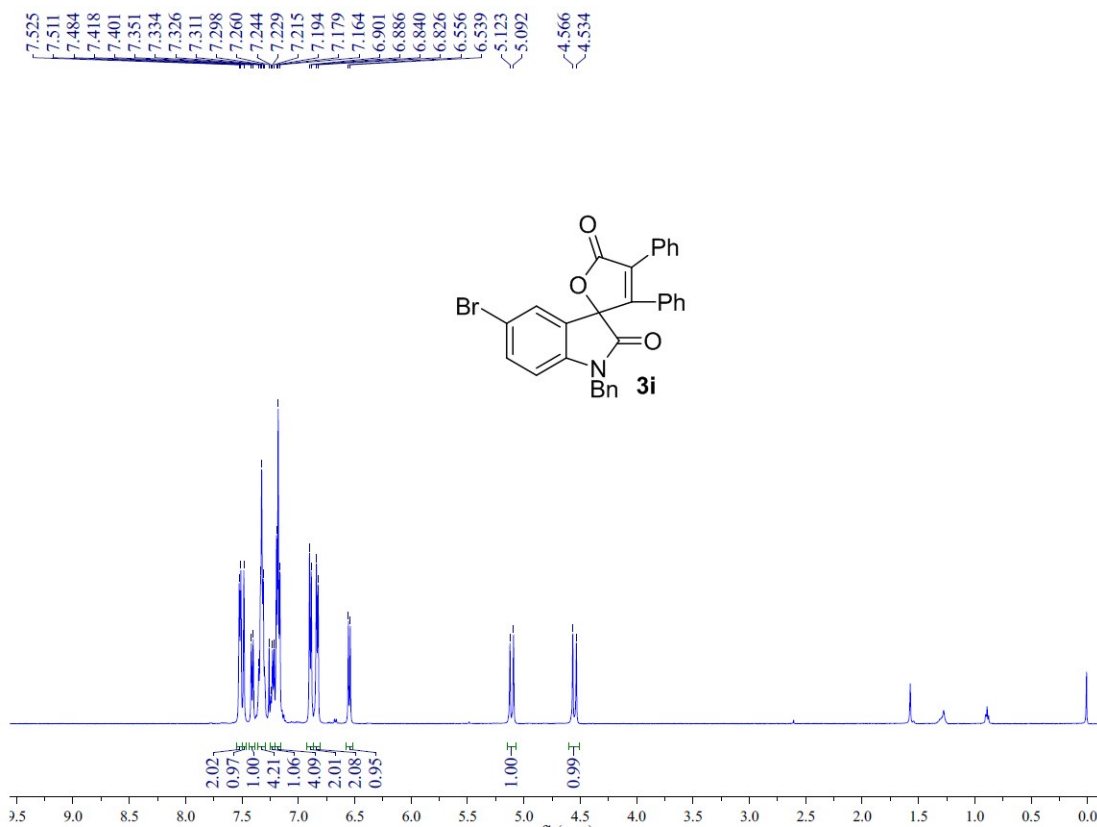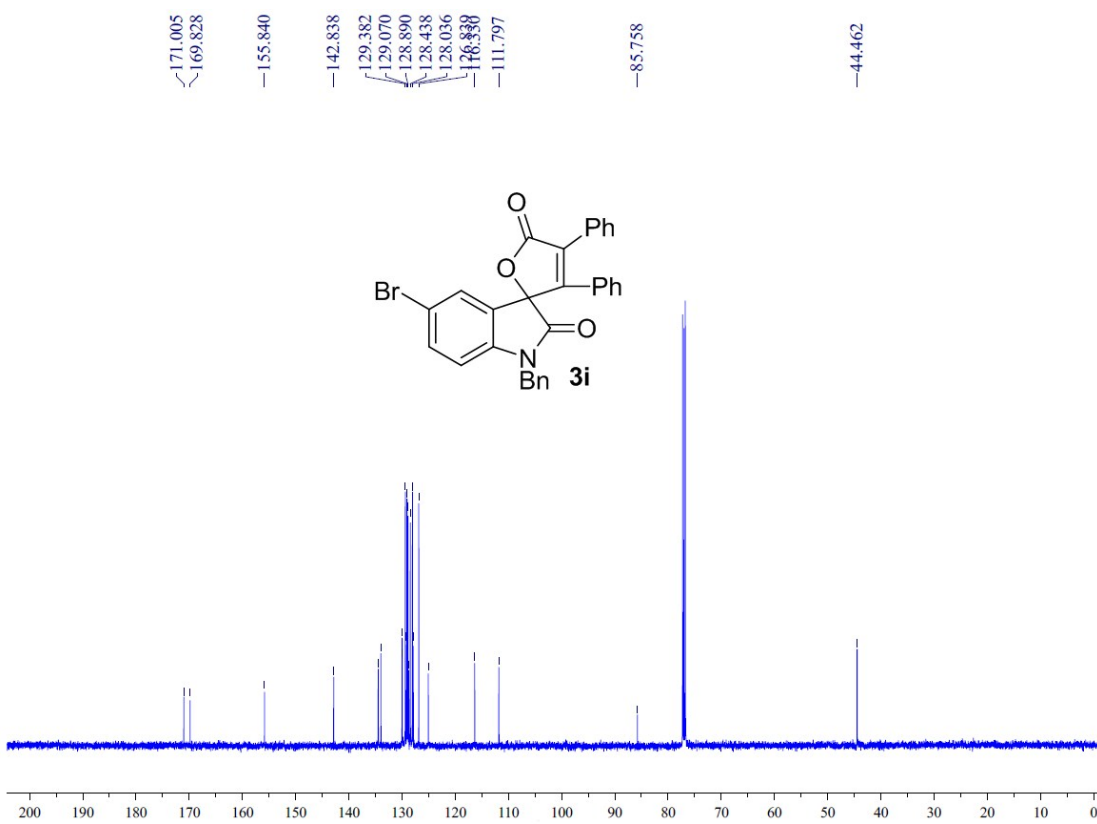

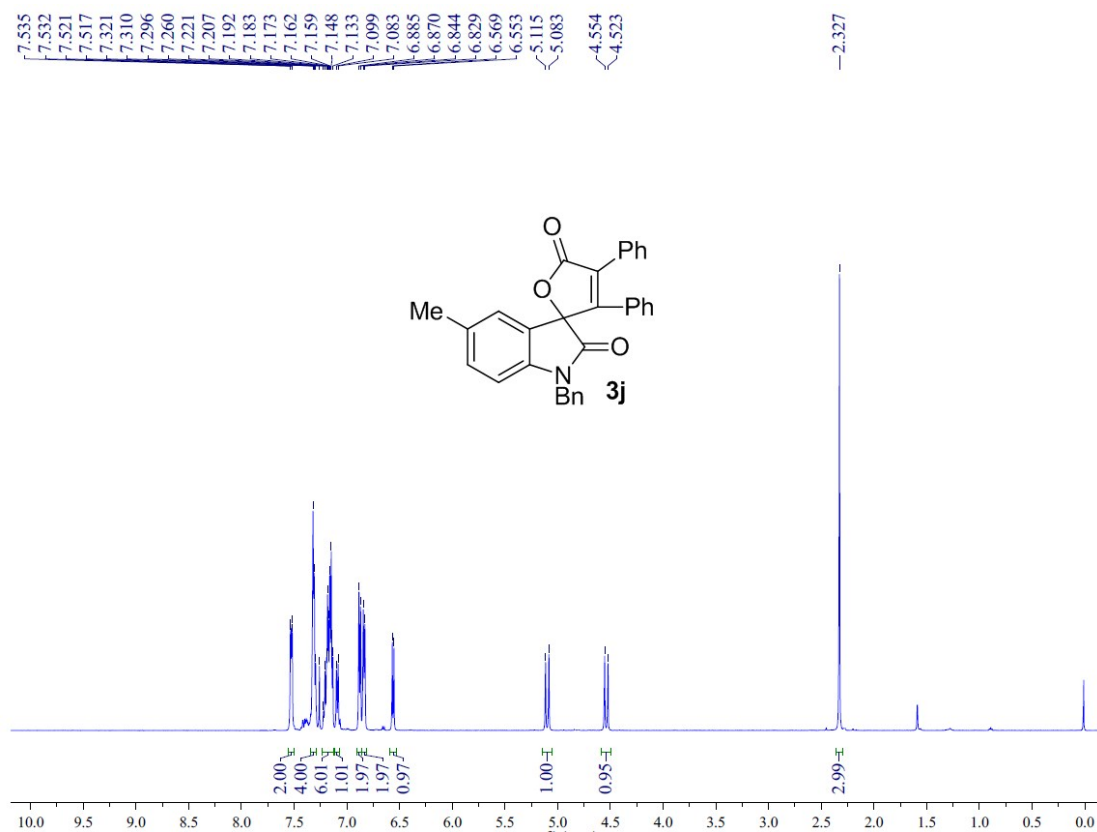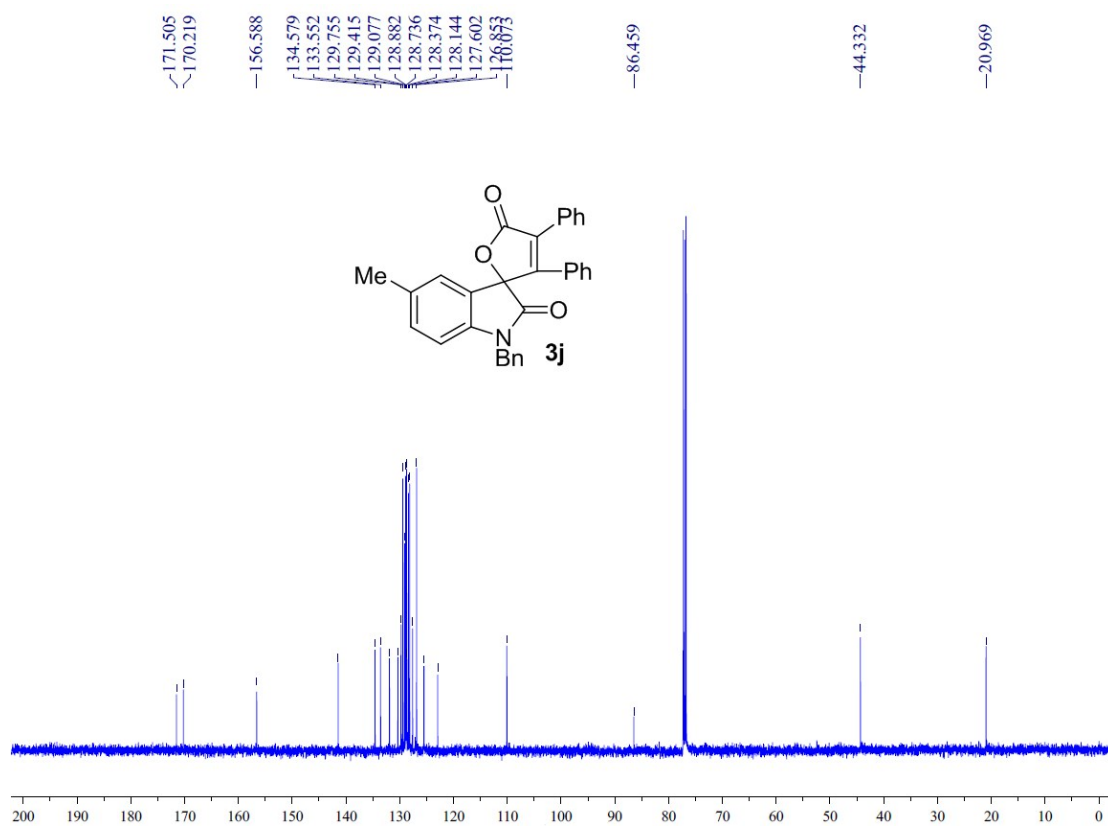

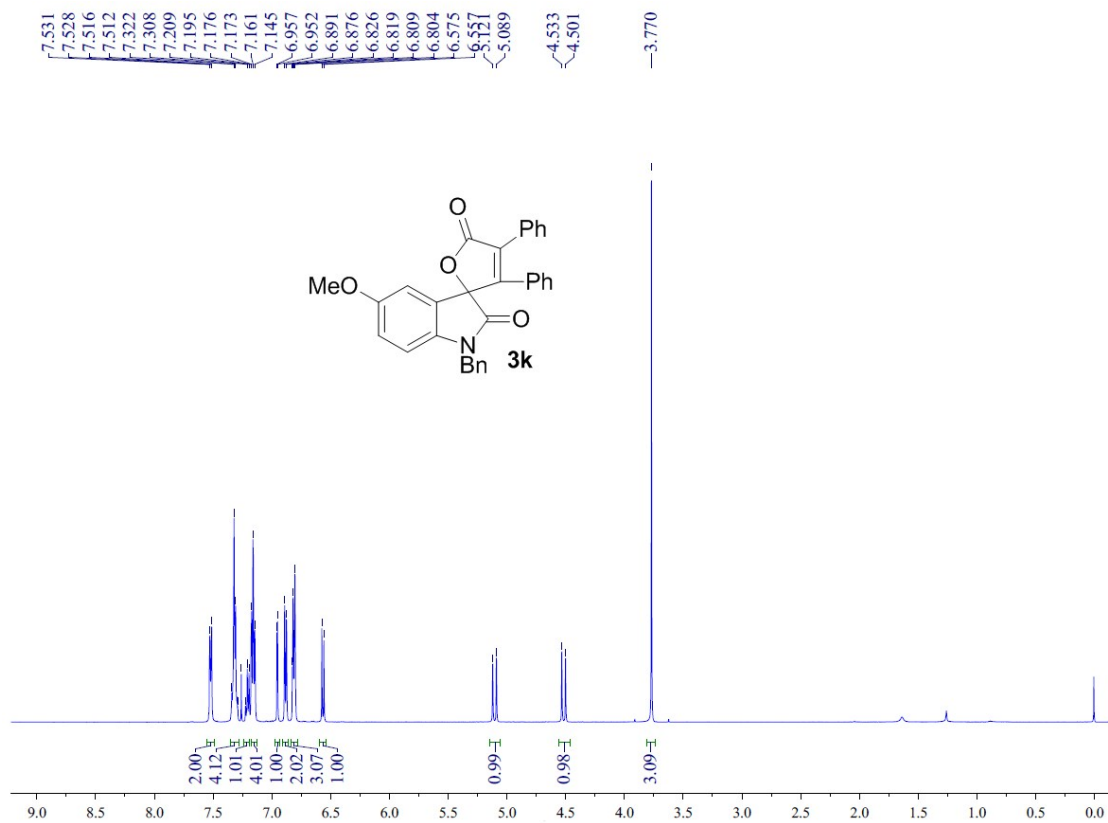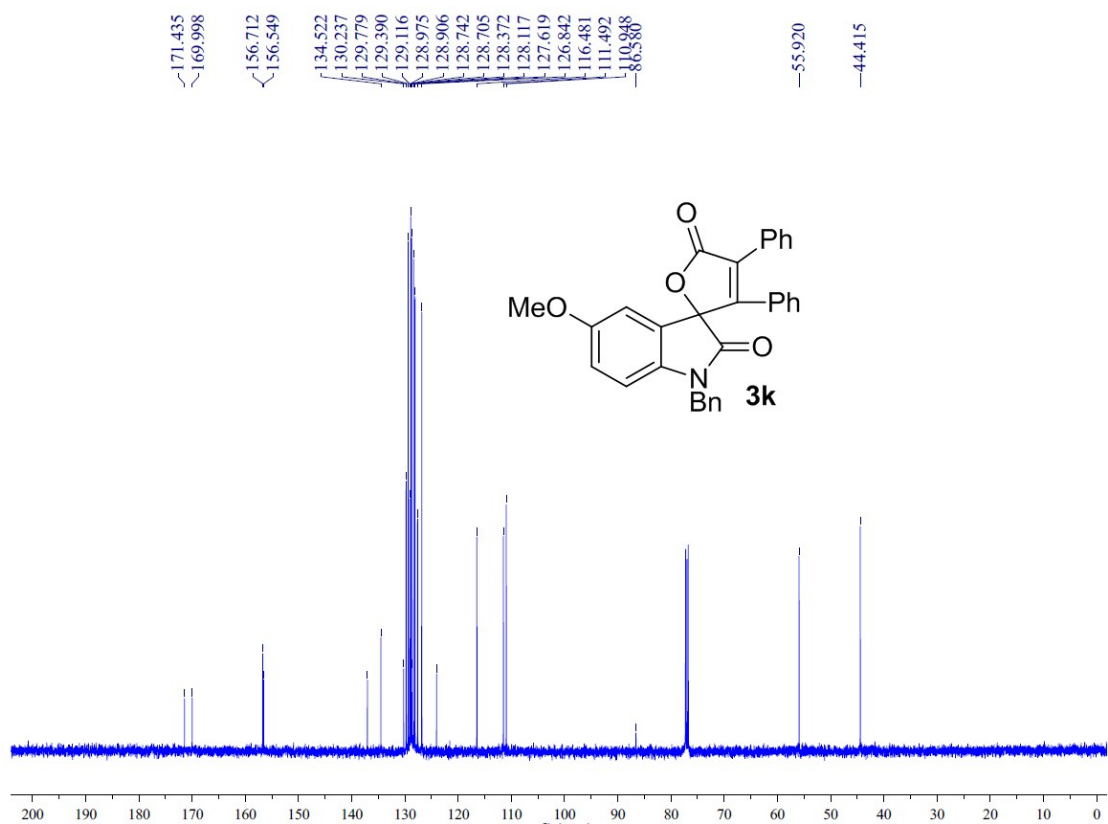

7.507  
7.494  
7.310  
7.297  
7.284  
7.268  
7.250  
7.220  
7.200  
7.184  
7.167  
7.155  
7.105  
7.090

5.107  
5.075  
4.555  
4.523

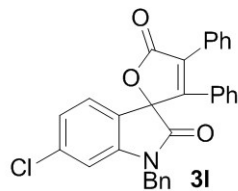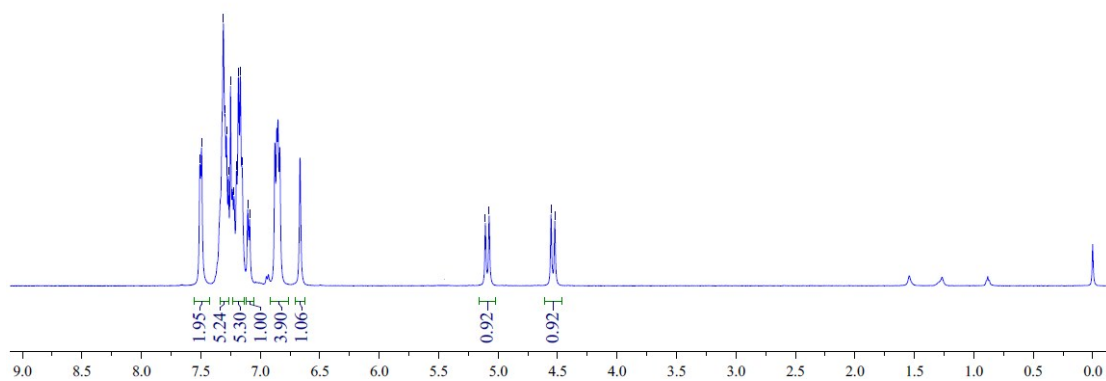

171.124  
170.286

155.947

129.918  
129.351  
129.250  
129.049  
128.928  
128.411  
127.979  
127.903  
126.792  
123.558  
120.364

85.665

44.453

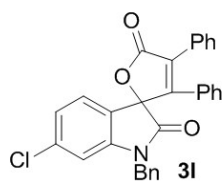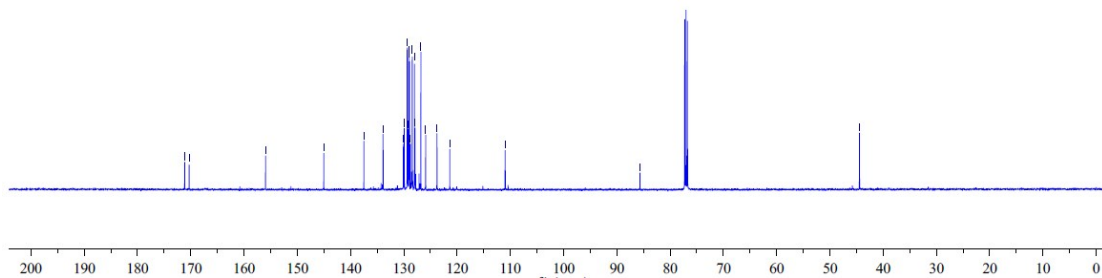



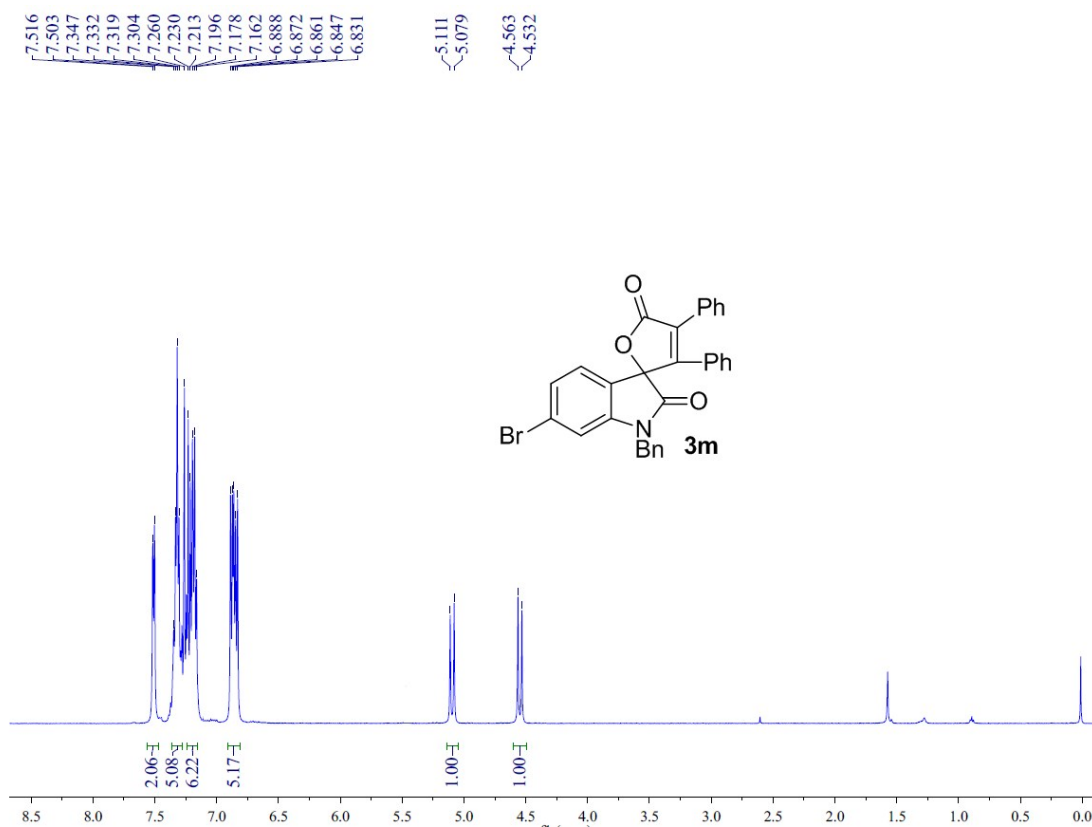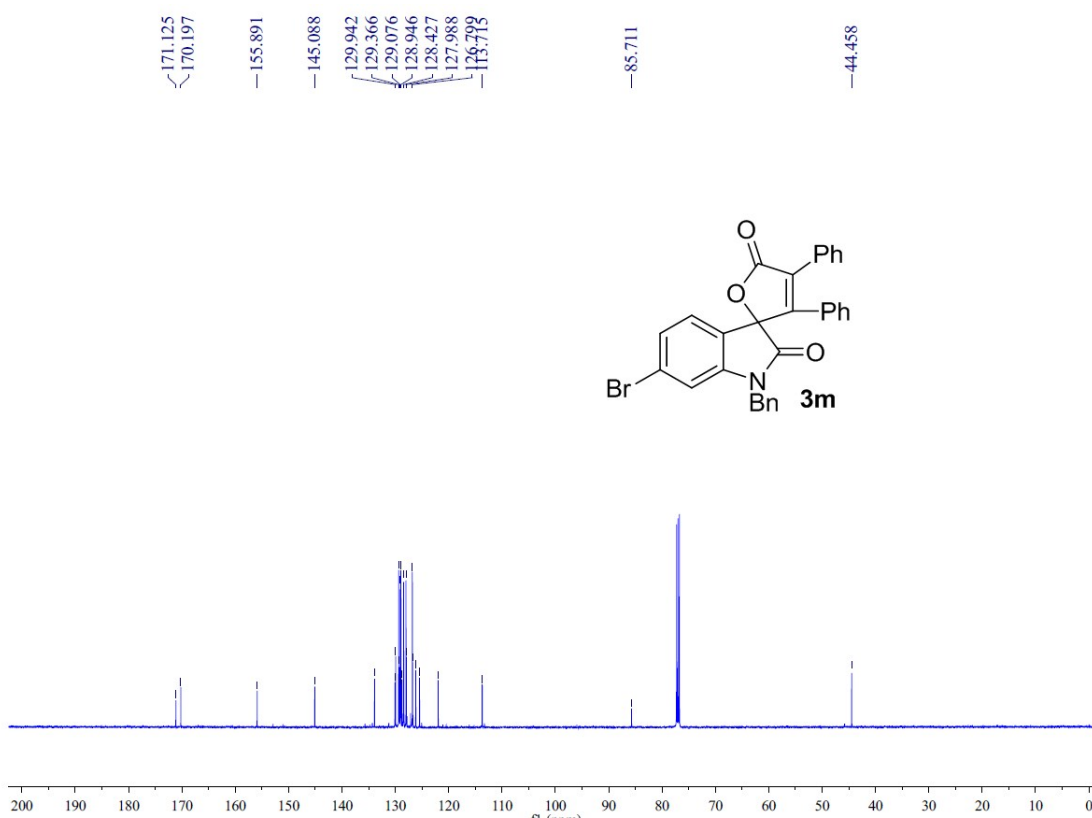

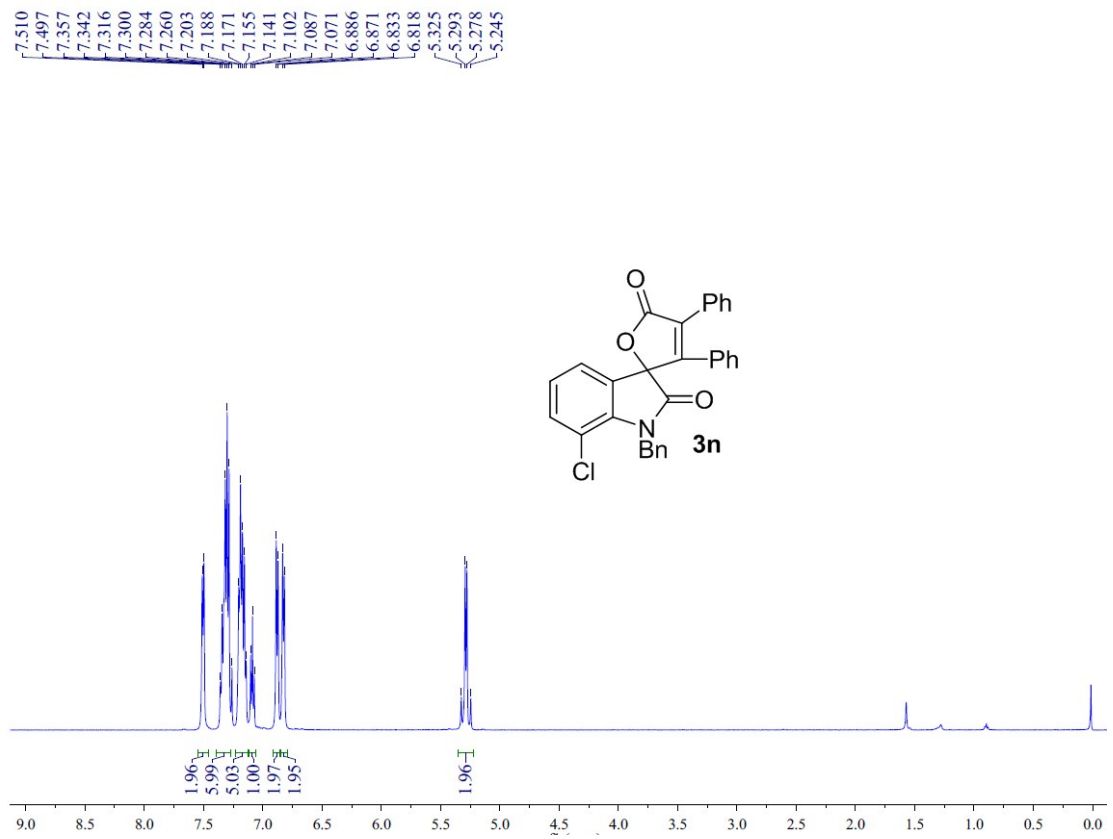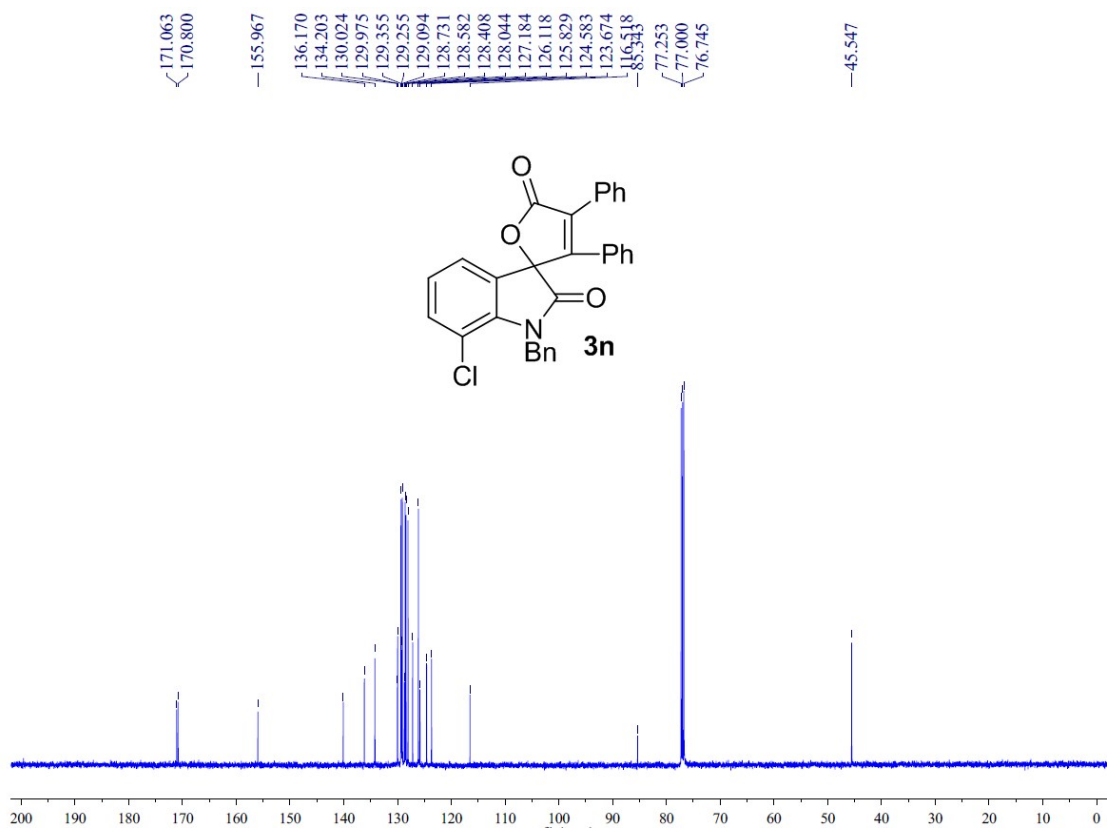

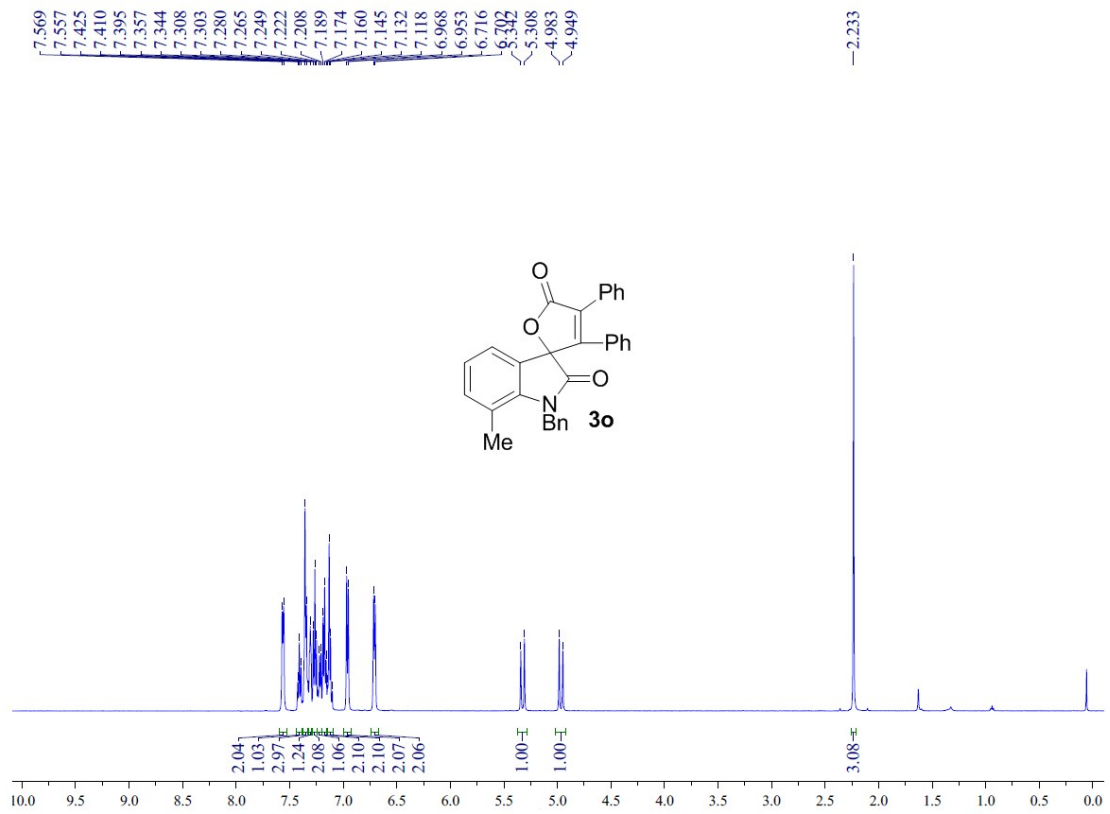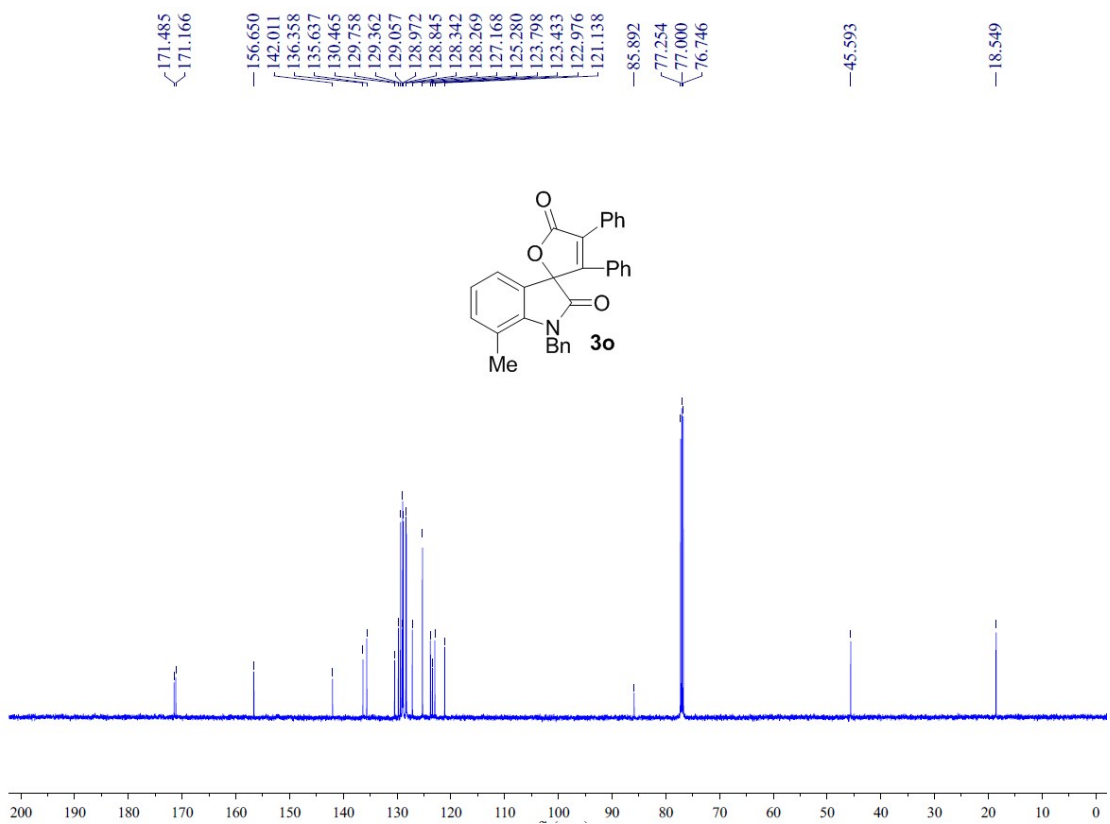

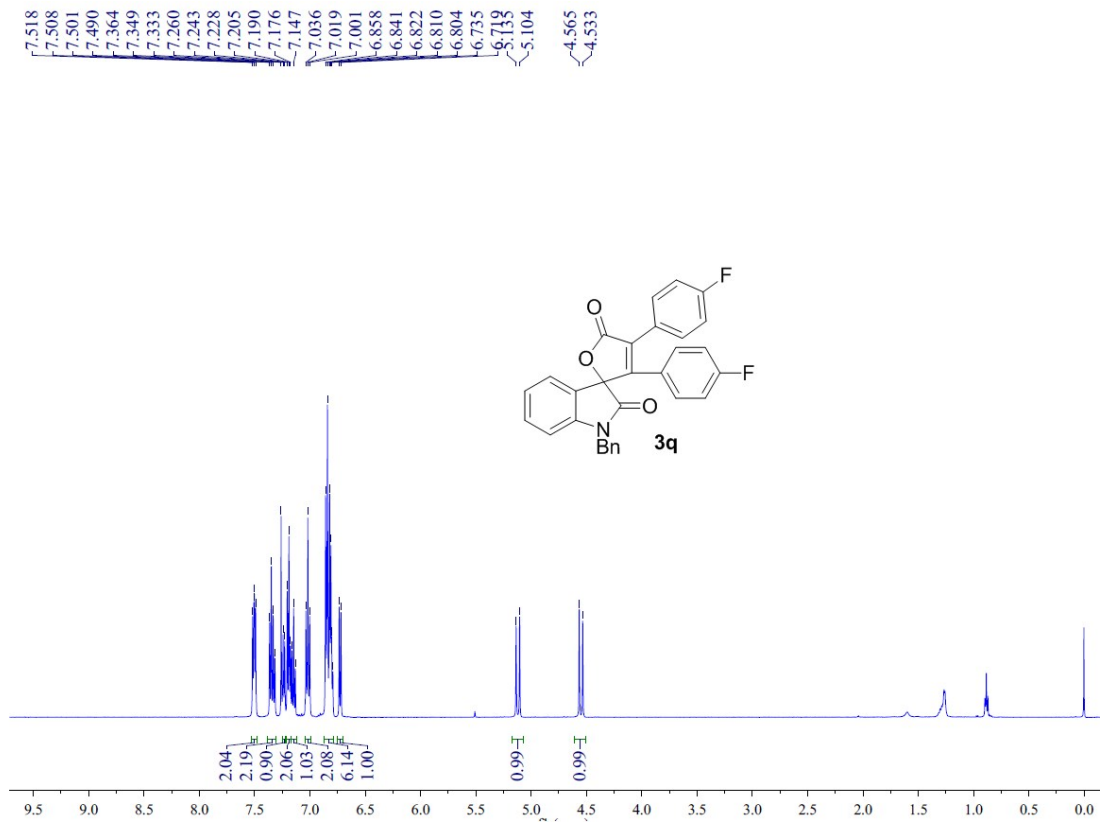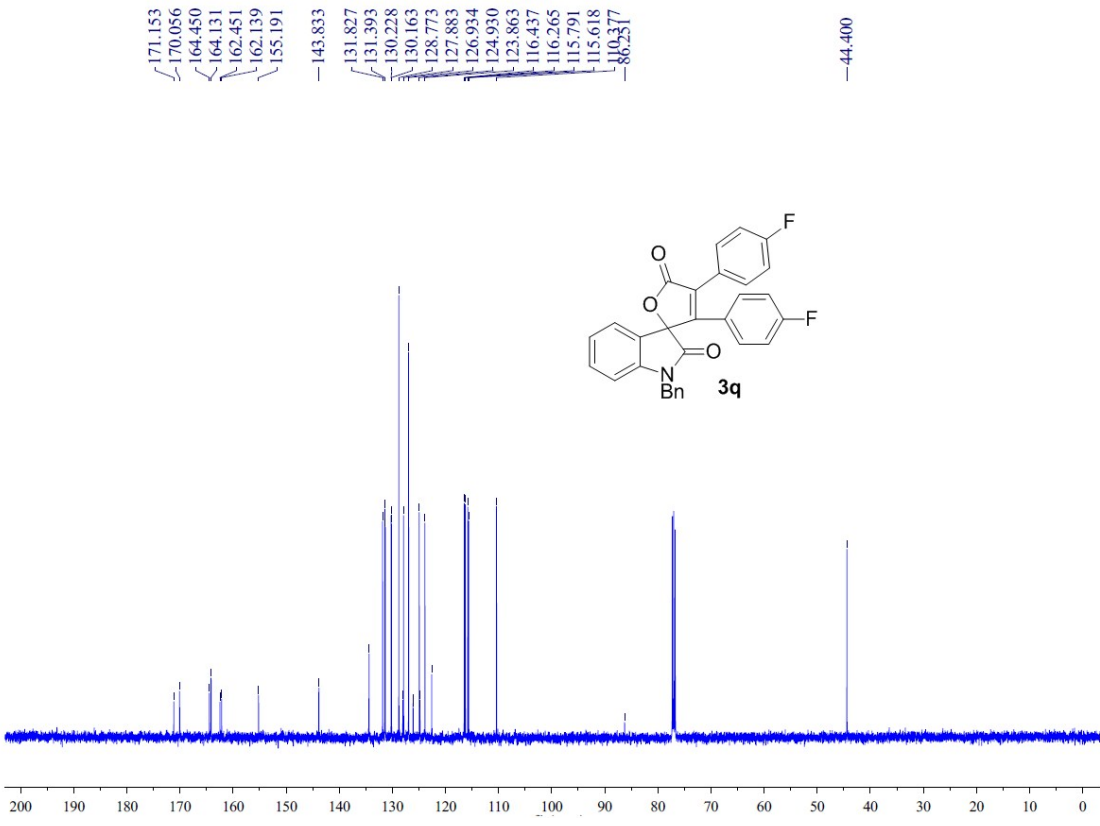

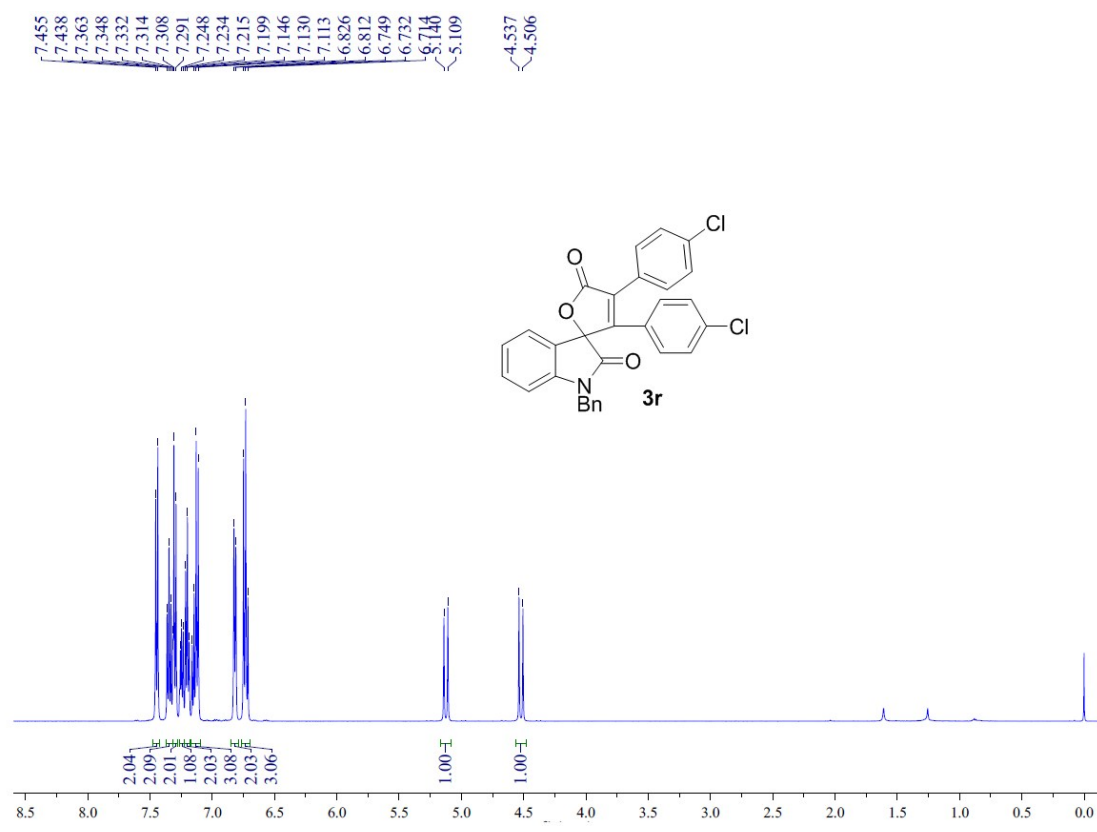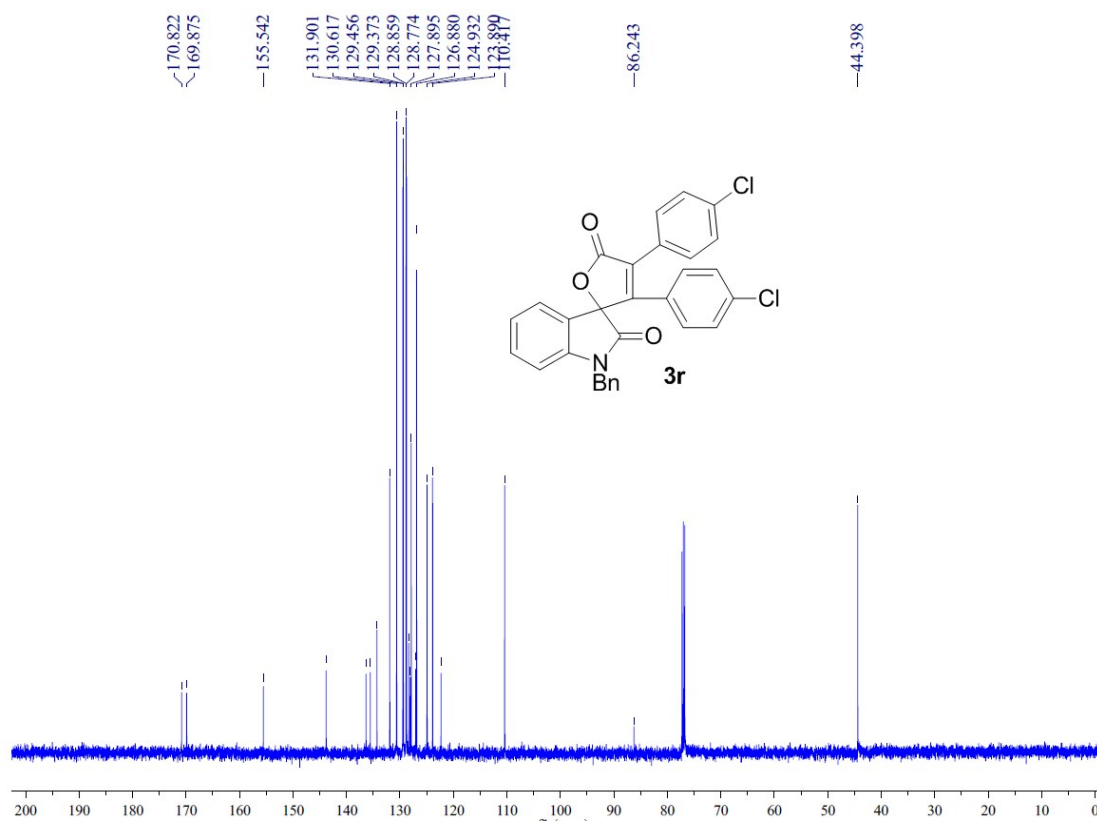

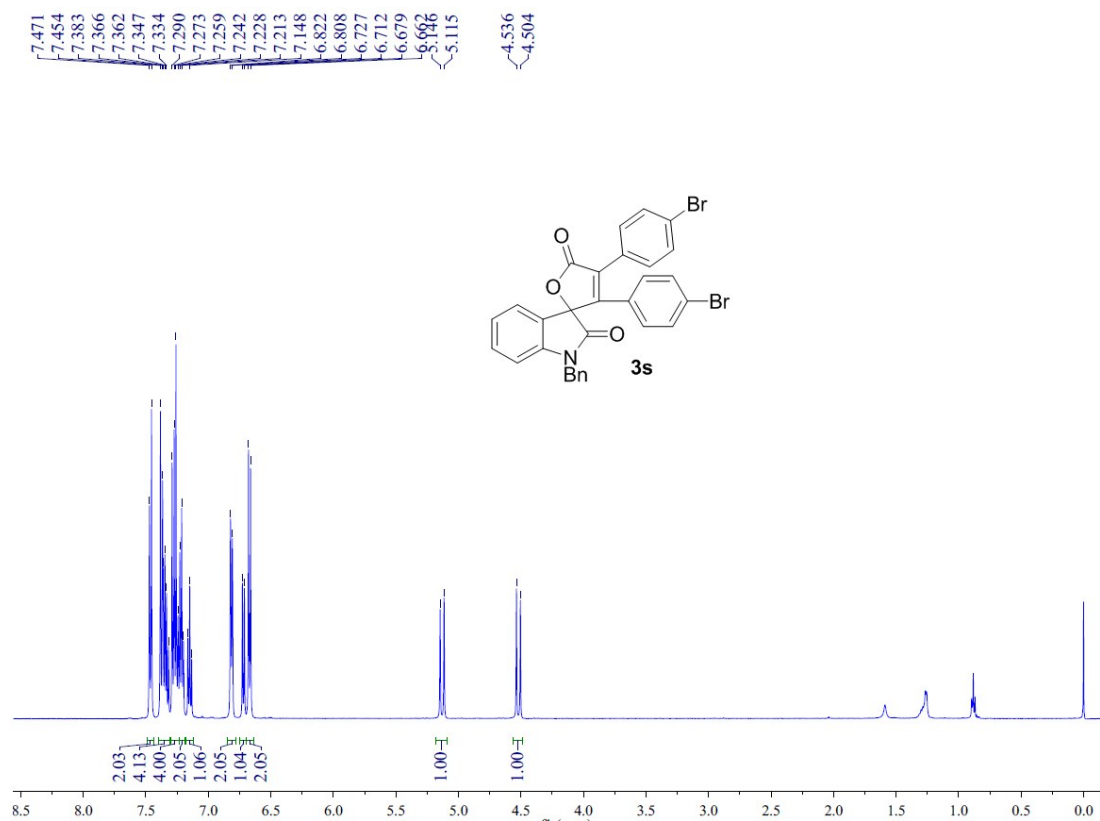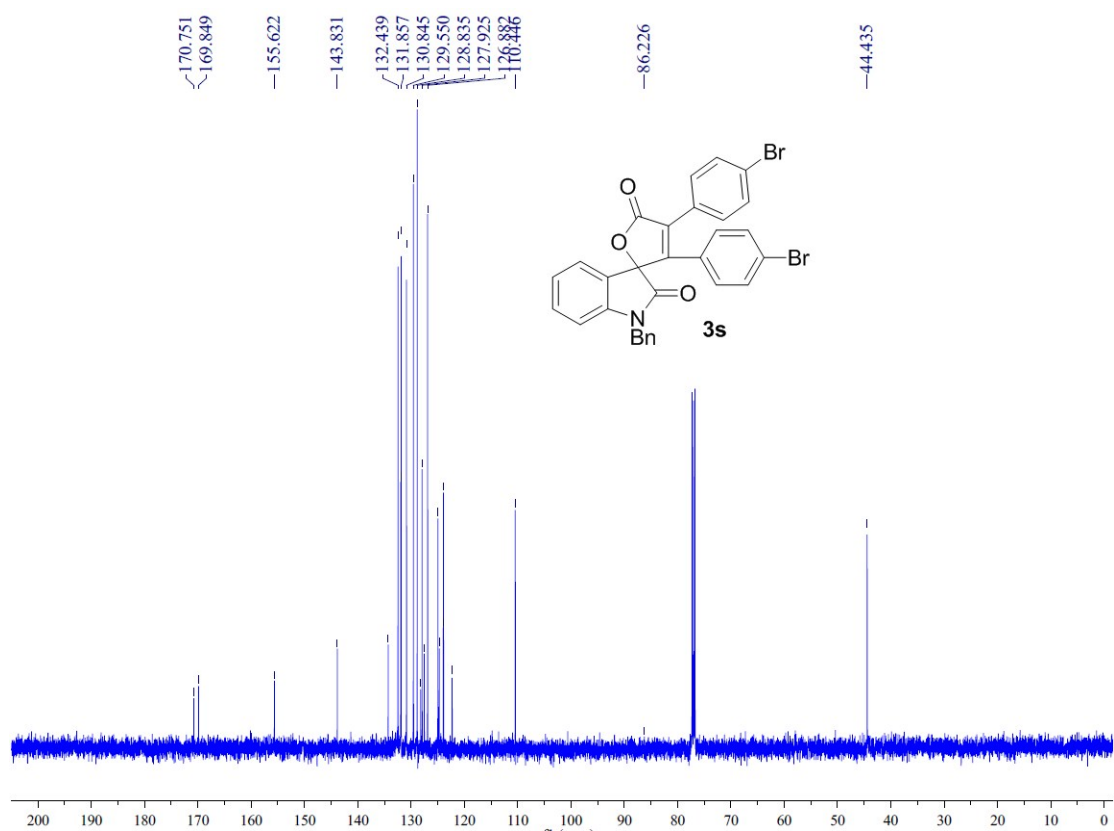

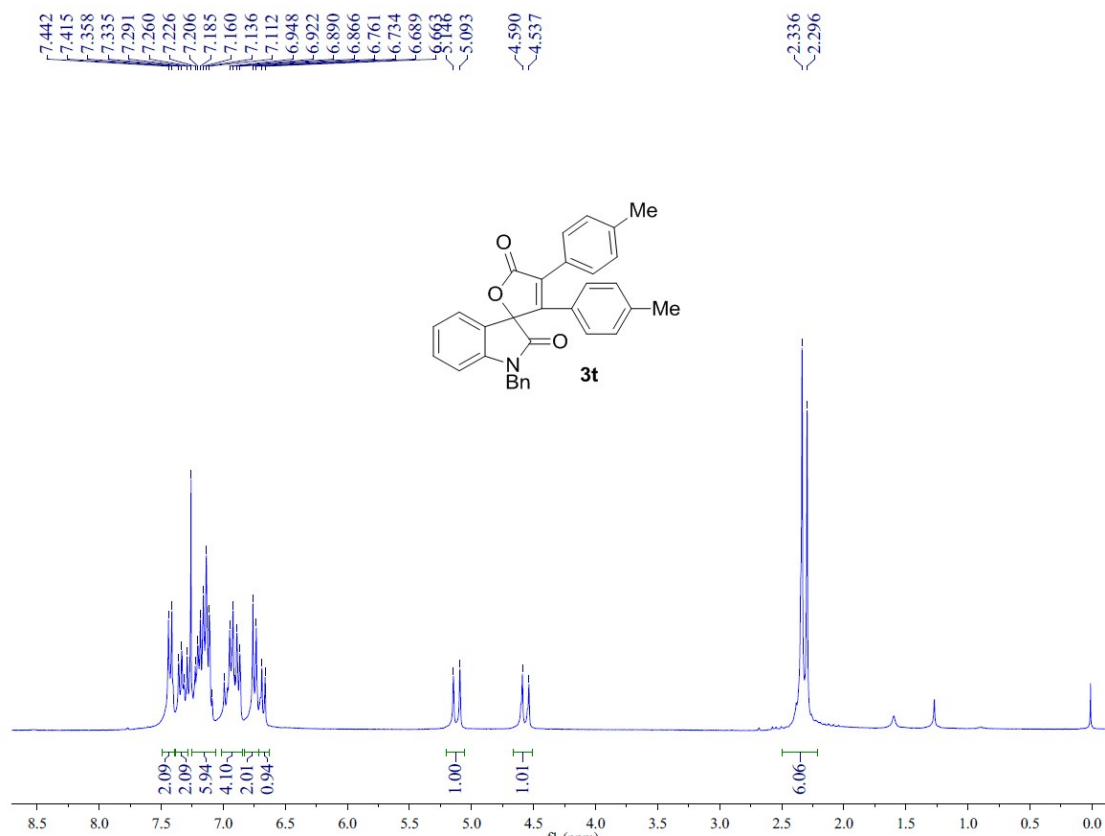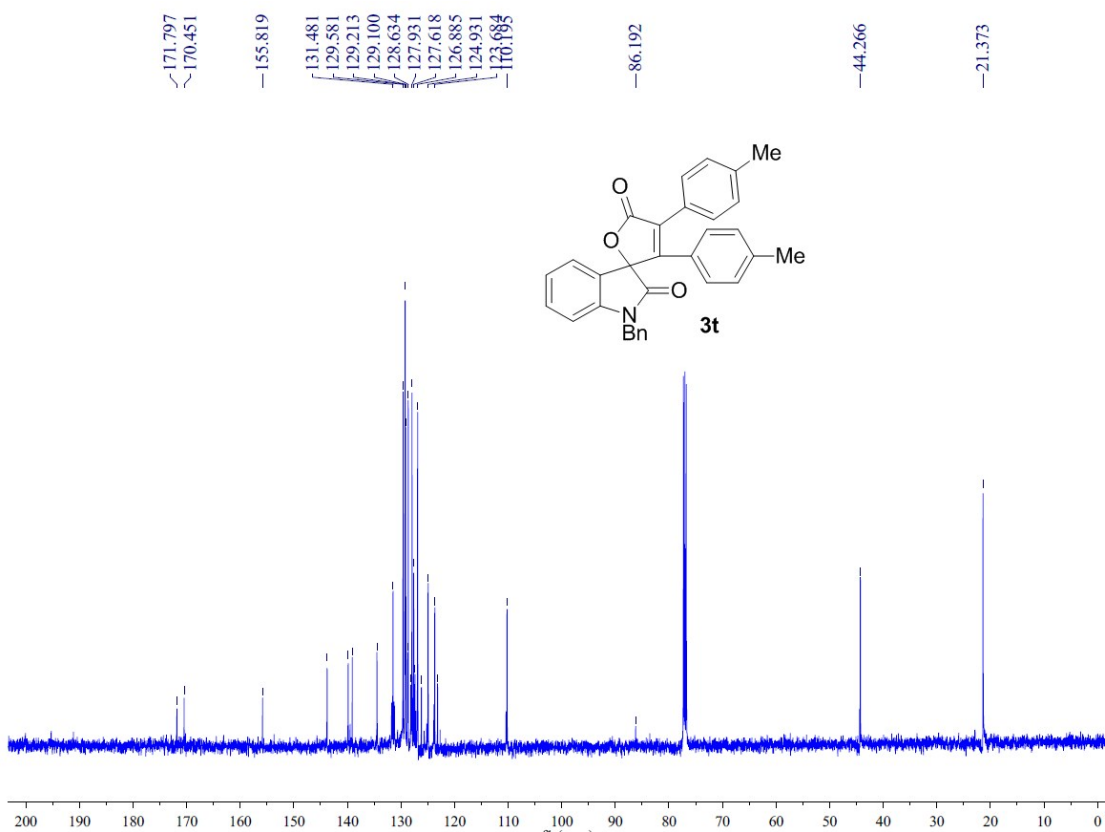

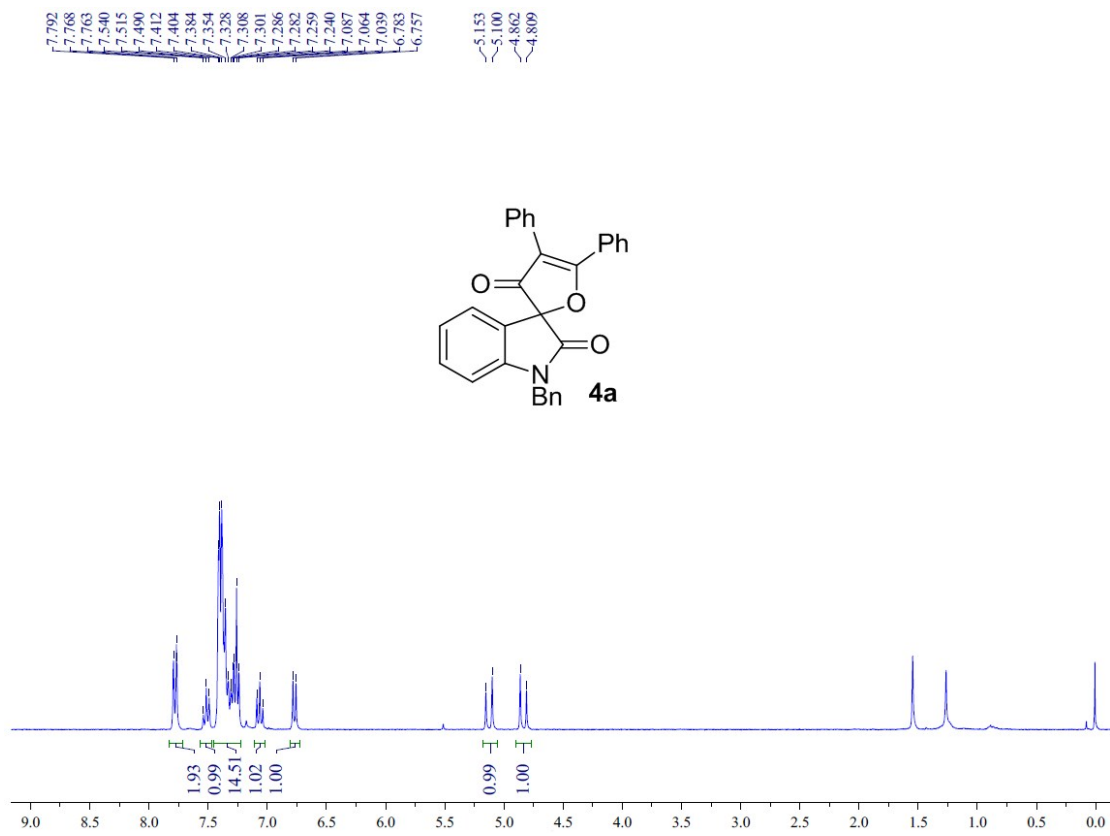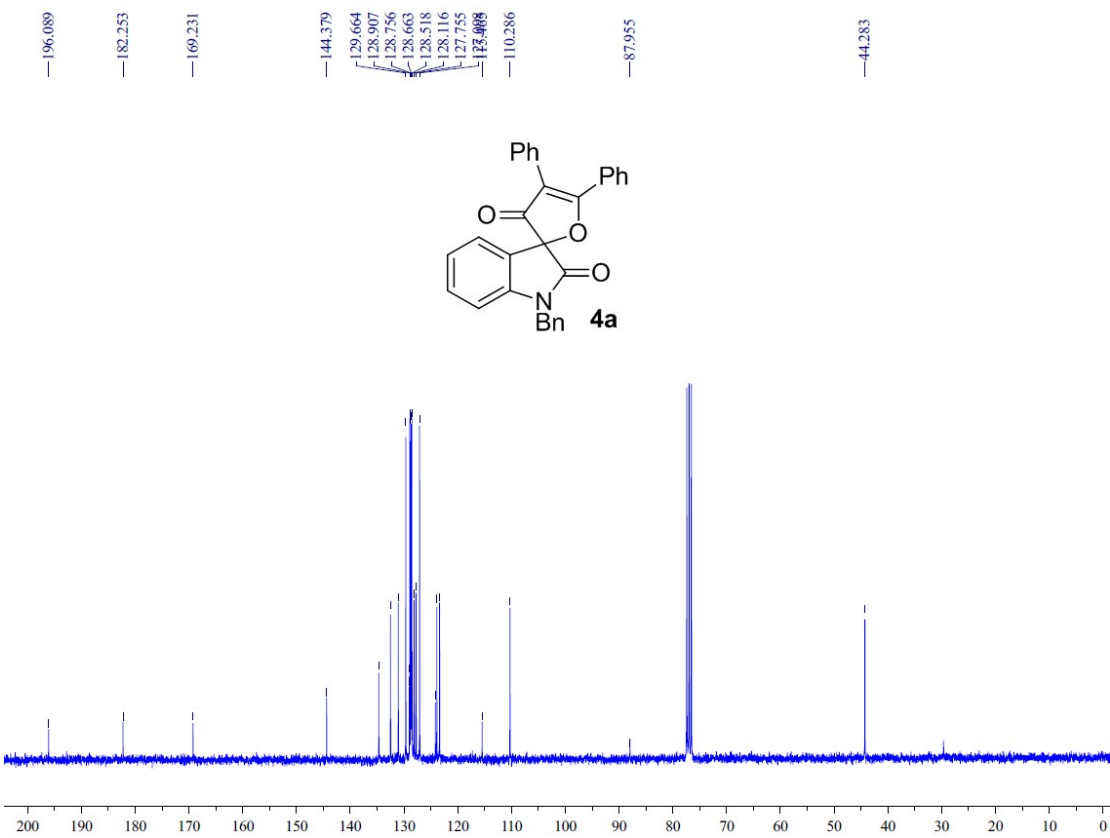



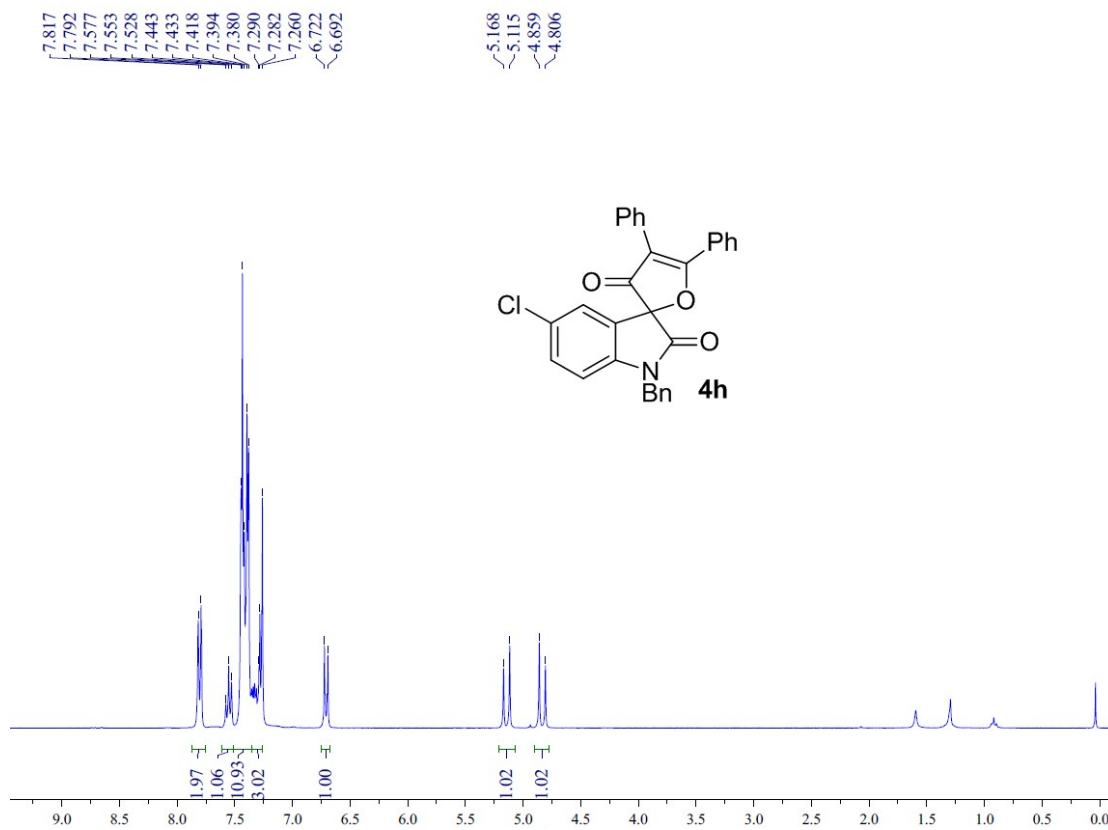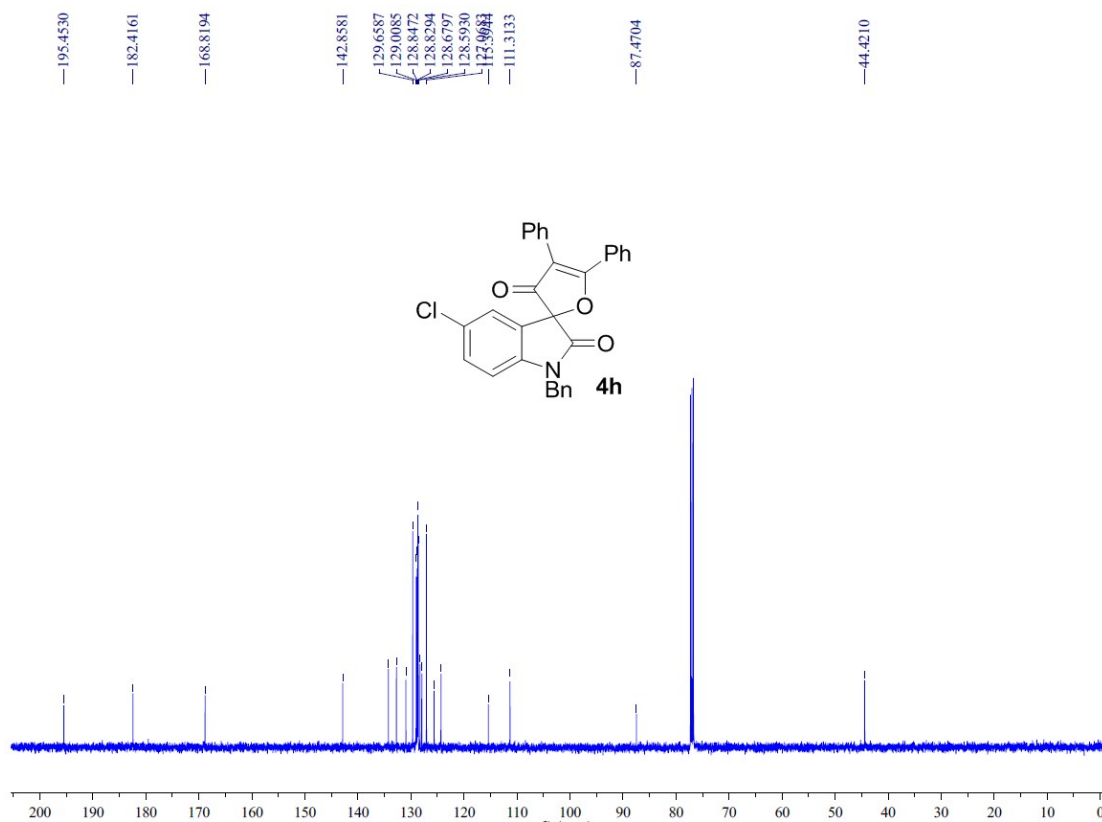

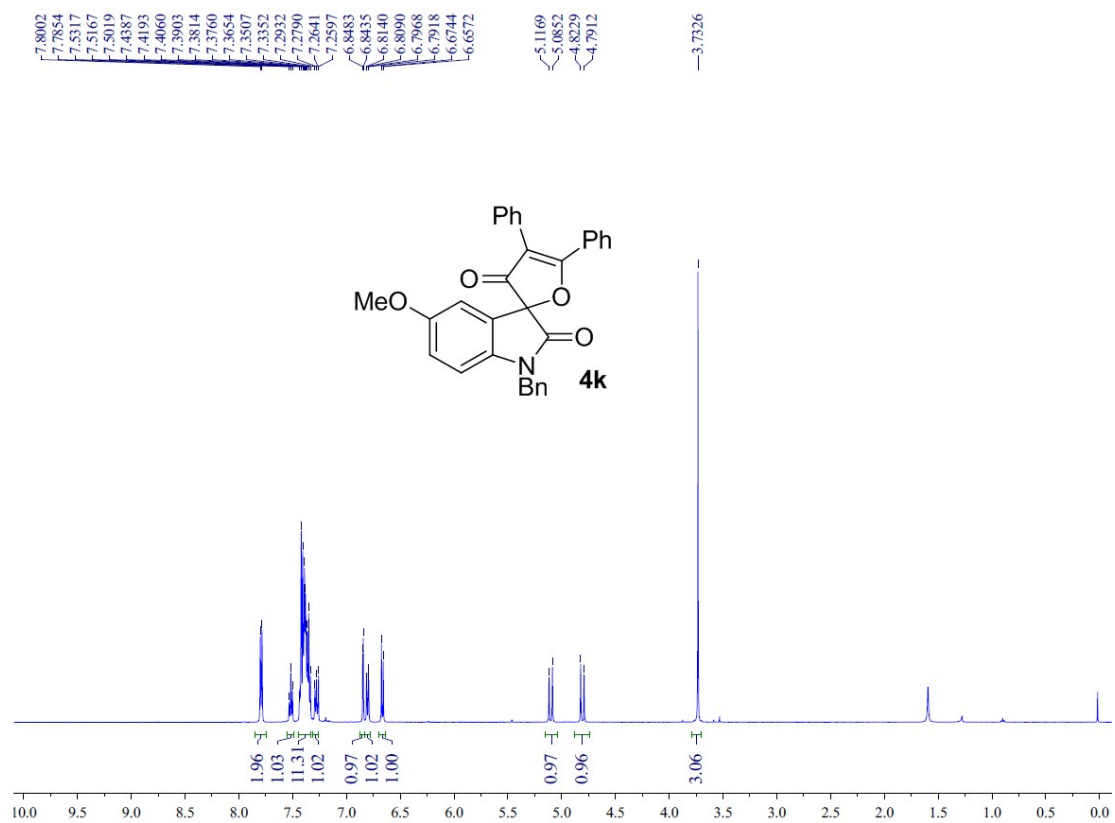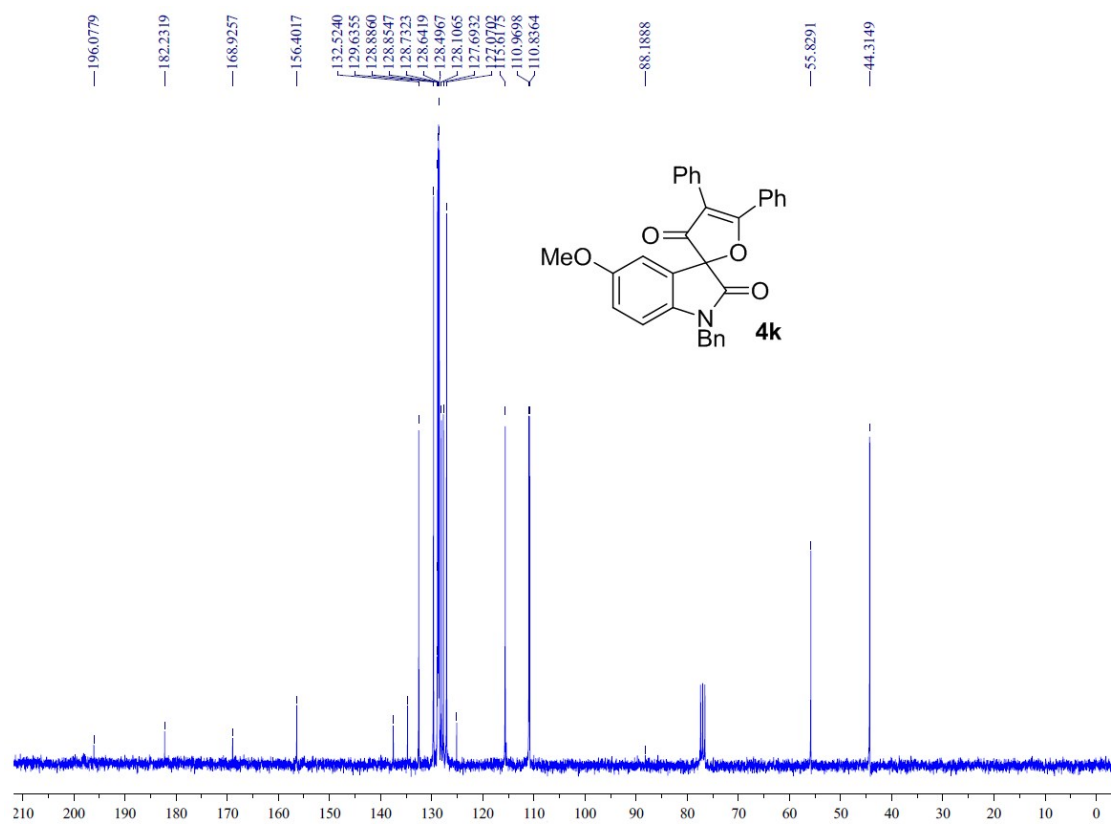

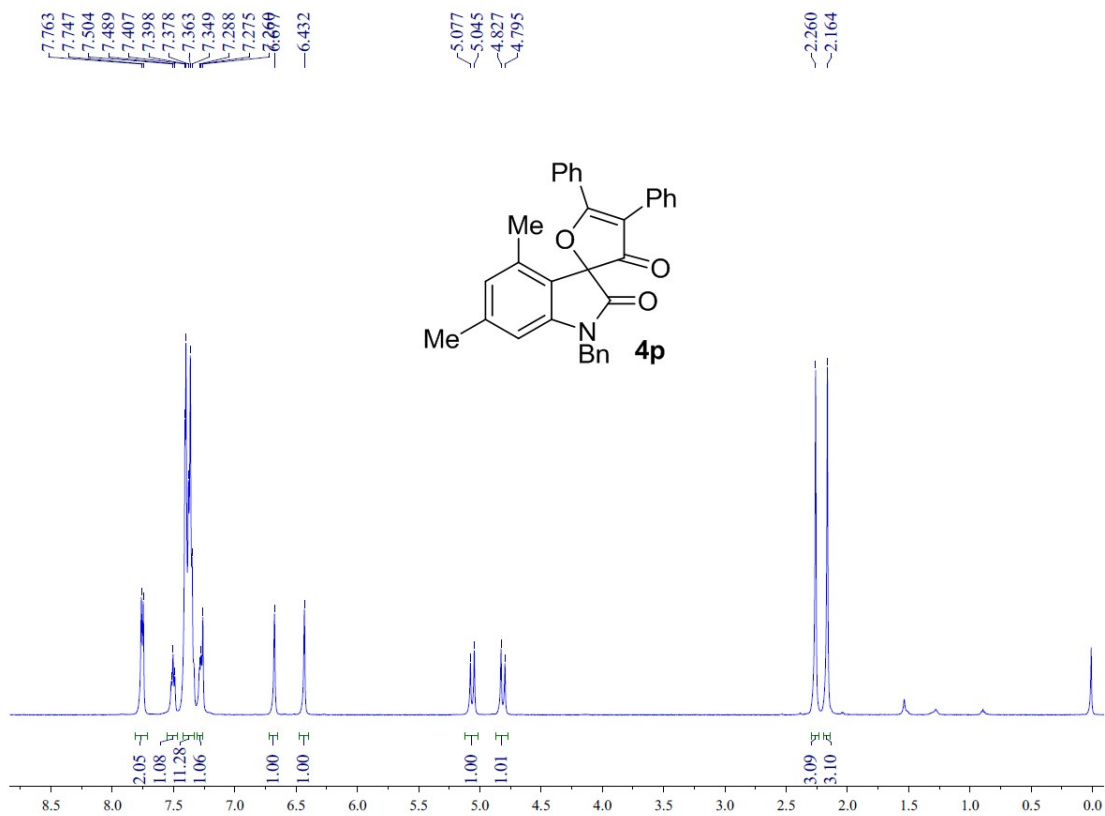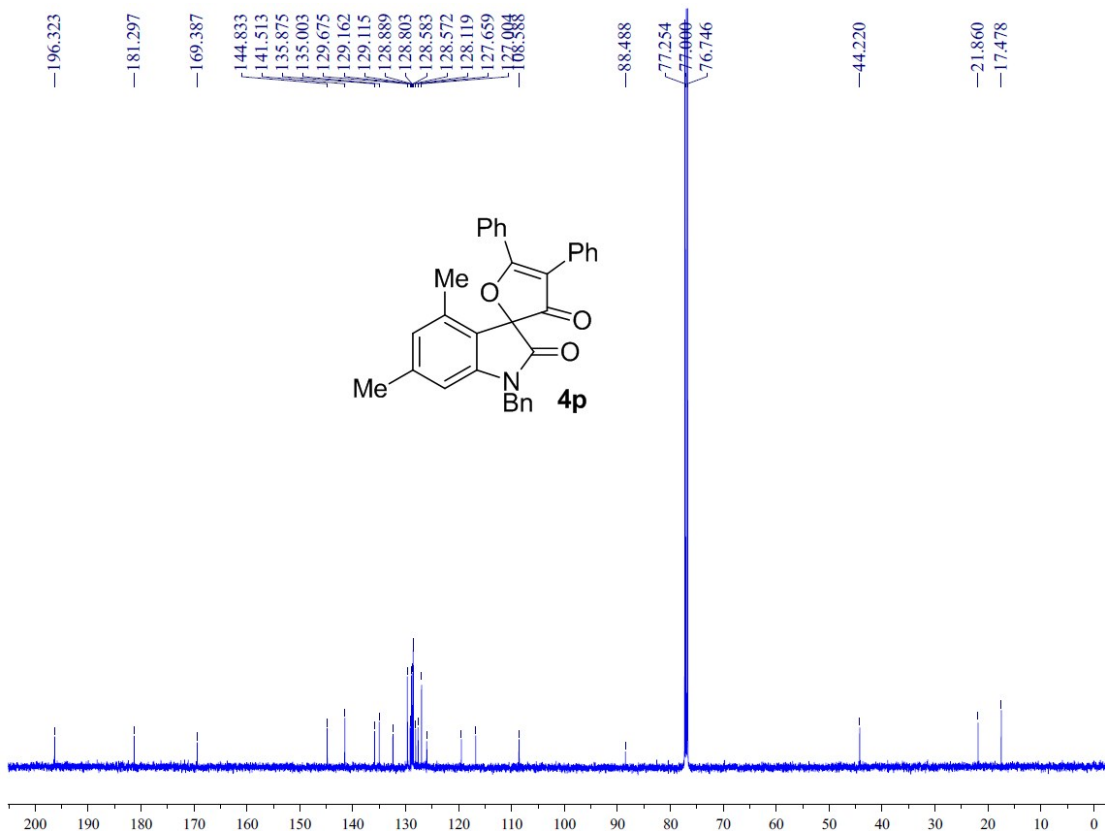

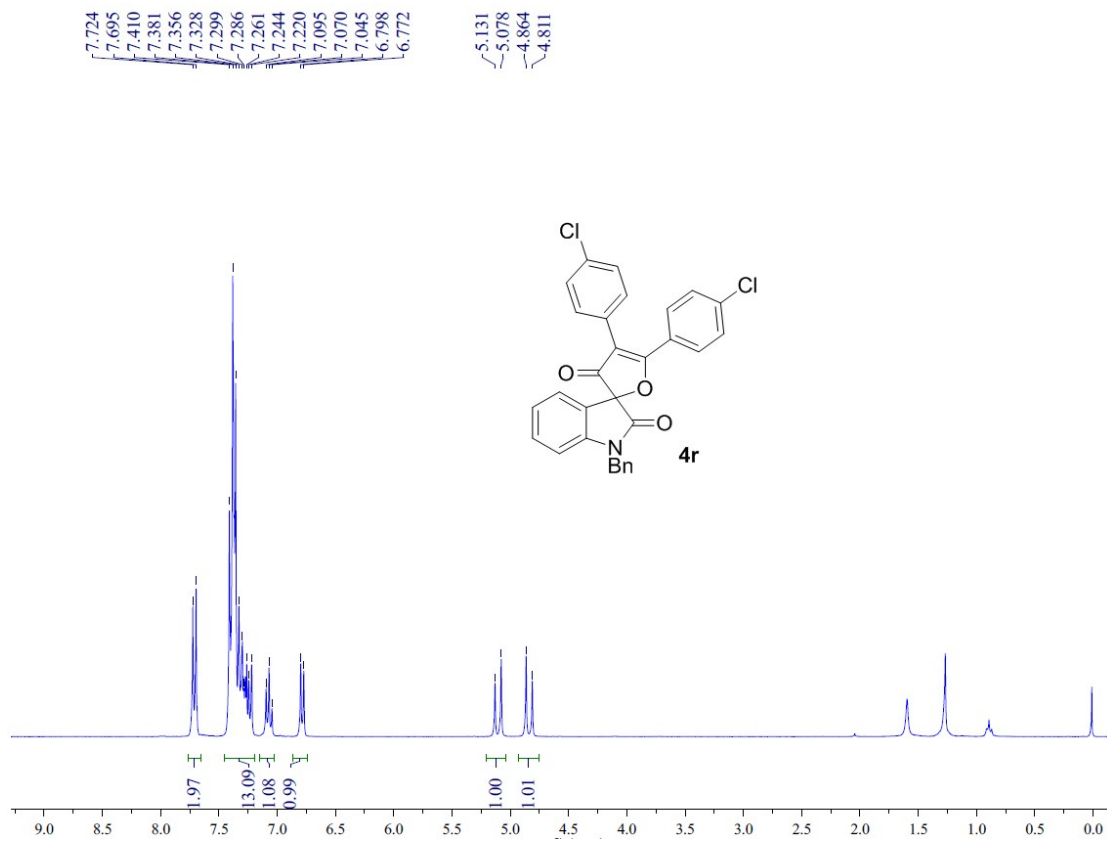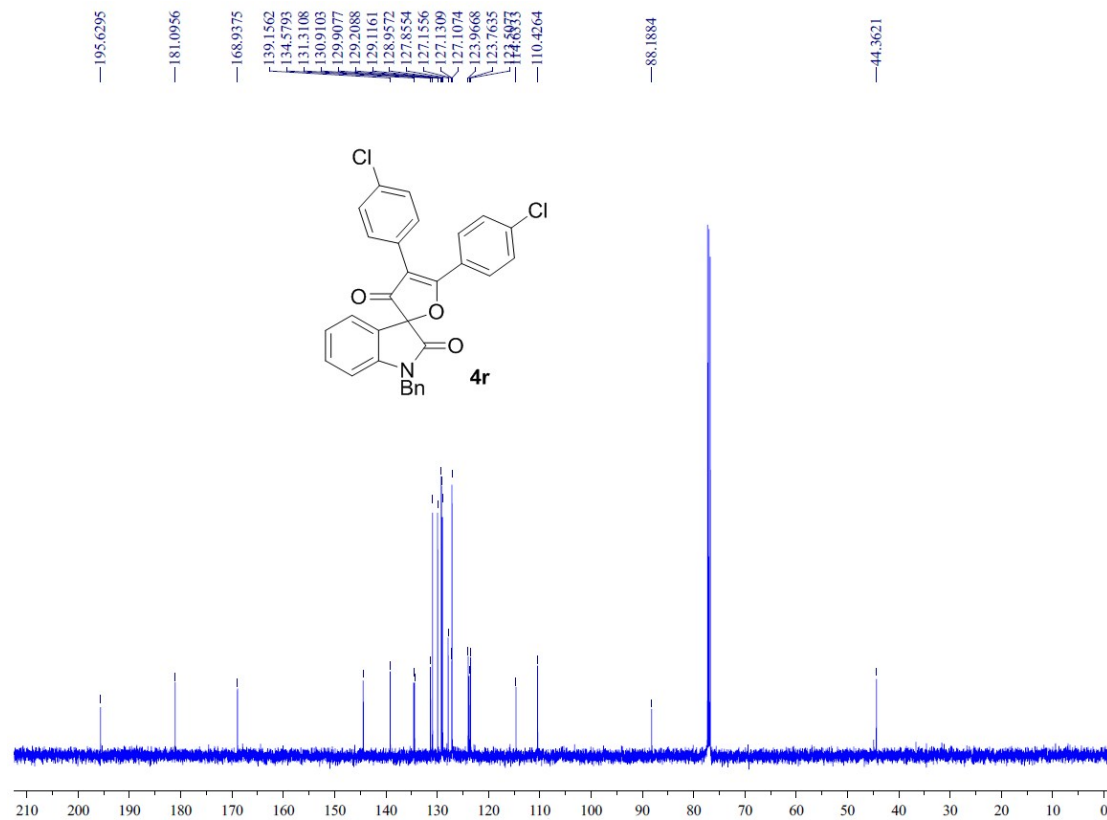

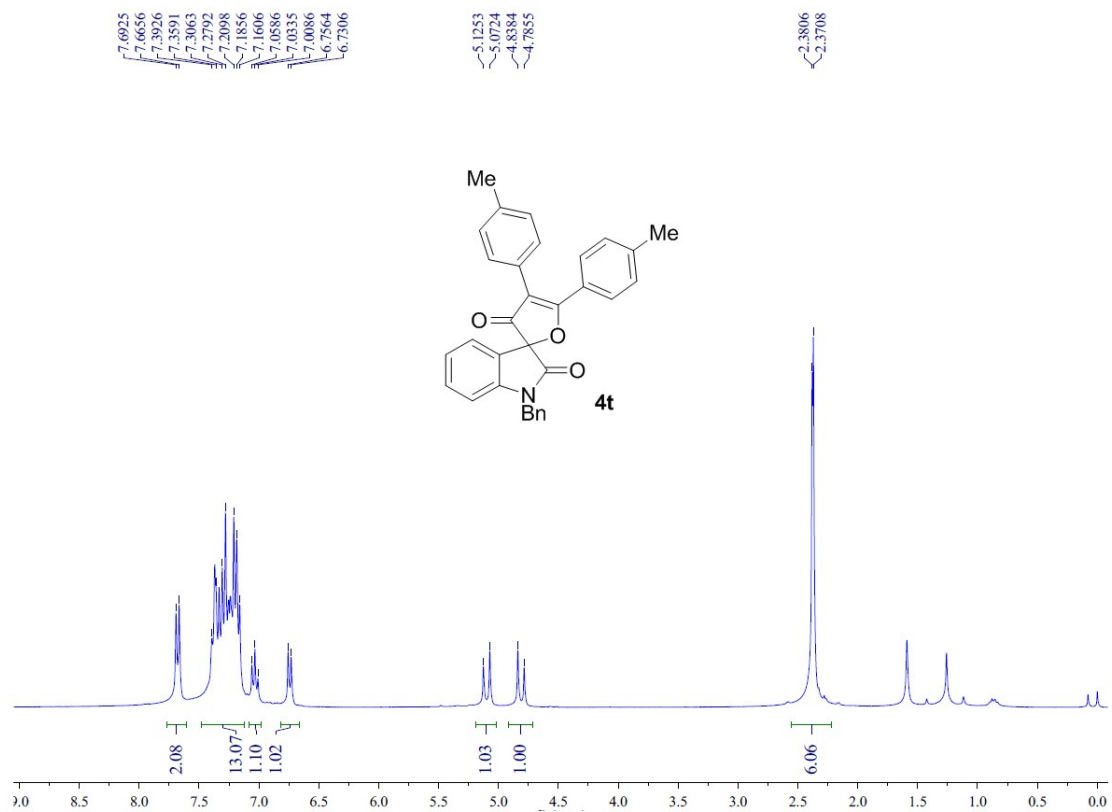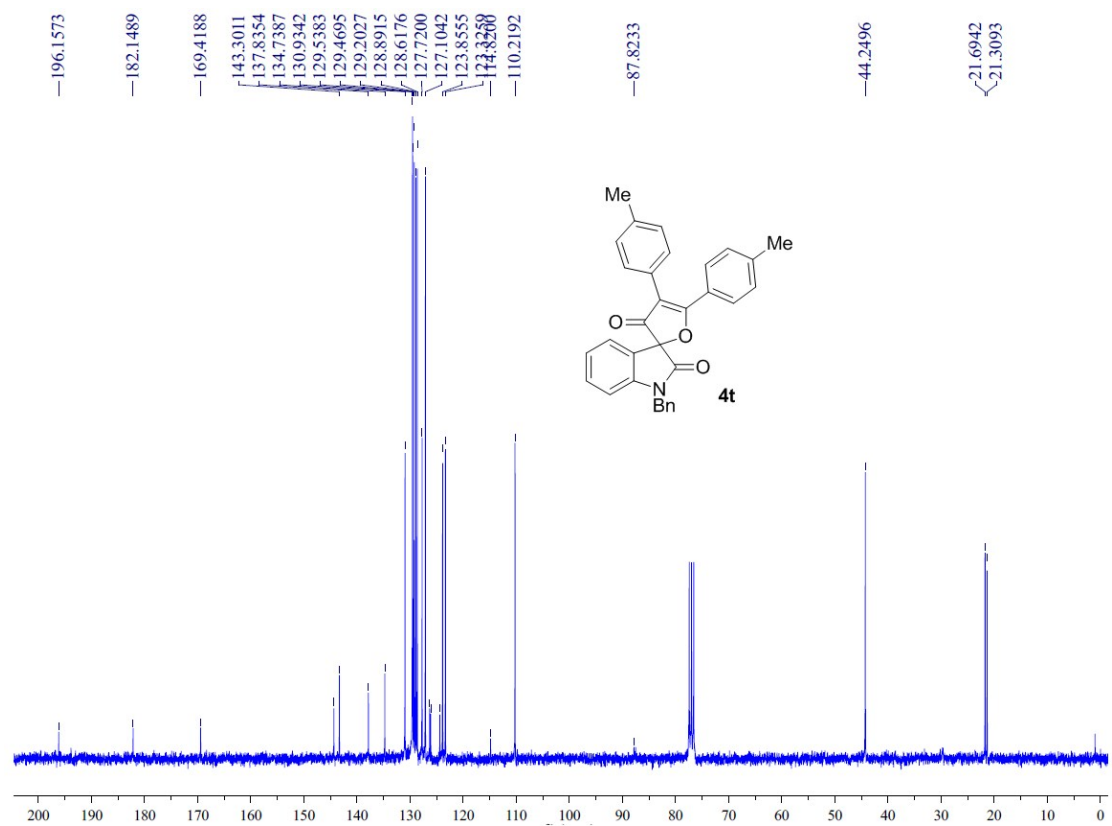

Product 3a

Conditions: *n*-hexane/*iso*-propanol : 70/30, 1.0 mL/min, wavelength = 254 nm

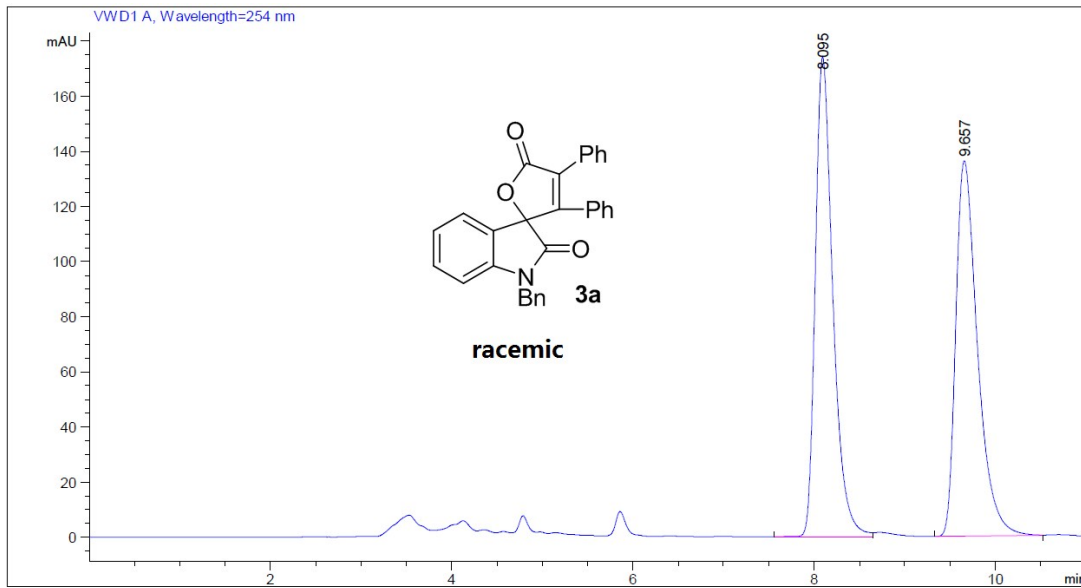

| Peak # | Ret. Time [min] | Type | Width [min] | Area [mAu*S] | Height [mAu] | Area %  |
|--------|-----------------|------|-------------|--------------|--------------|---------|
| 1      | 8.095           | BV   | 0.2035      | 2334.52637   | 174.08165    | 50.6523 |
| 2      | 9.657           | BB   | 0.2527      | 2274.39380   | 136.25620    | 49.3477 |

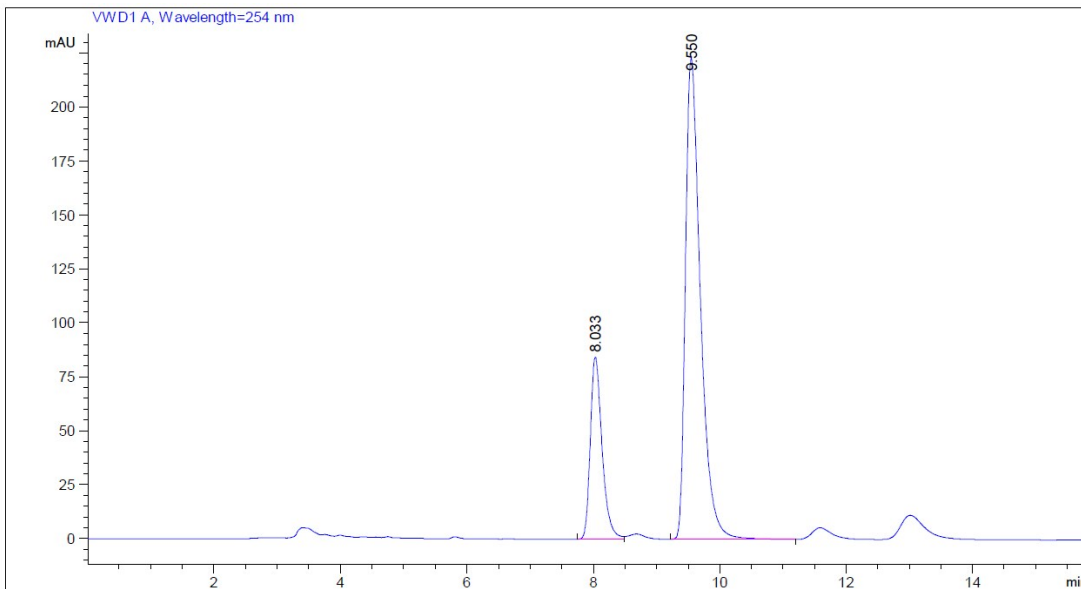

| Peak # | Ret. Time [min] | Type | Width [min] | Area [mAu*S] | Height [mAu] | Area %  |
|--------|-----------------|------|-------------|--------------|--------------|---------|
| 1      | 8.033           | BV   | 0.1955      | 1089.04285   | 84.39812     | 22.9091 |
| 2      | 9.550           | BB   | 0.2487      | 3664.71484   | 223.00858    | 77.0909 |

### Product 3g

Conditions: *n*-hexane/*iso*-propanol : 85/15, 1.0 mL/min, wavelength = 254 nm

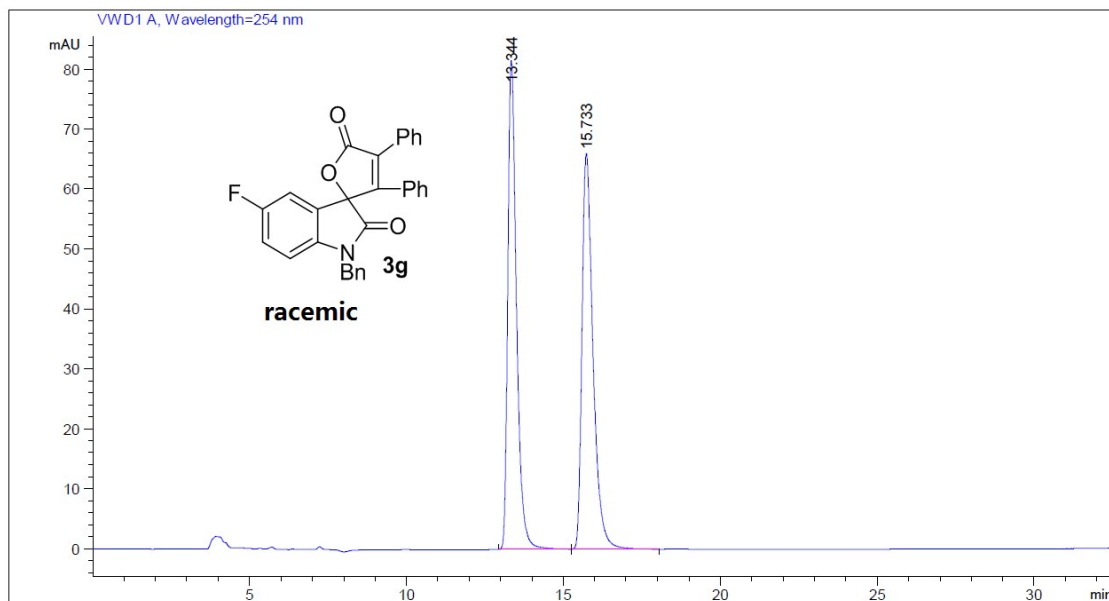

| Peak # | Ret. Time [min] | Type | Width [min] | Area [mAu*S] | Height [mAu] | Area %  |
|--------|-----------------|------|-------------|--------------|--------------|---------|
| 1      | 13.344          | BB   | 0.2914      | 1568.17139   | 81.52502     | 49.3591 |
| 2      | 15.733          | BB   | 0.3683      | 1608.89307   | 66.02481     | 50.6409 |

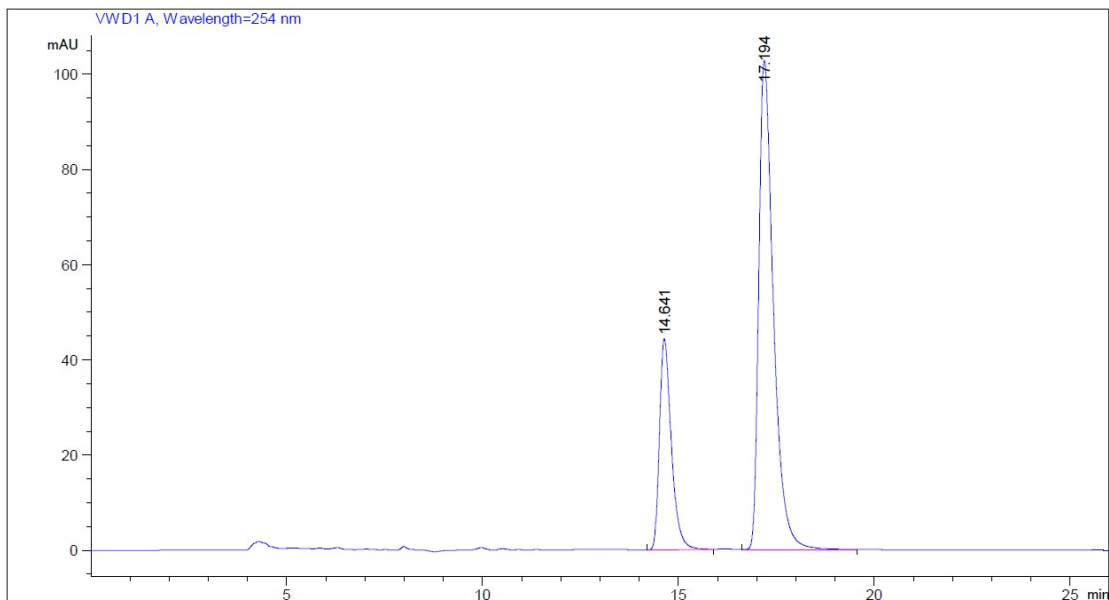

| Peak # | Ret. Time [min] | Type | Width [min] | Area [mAu*S] | Height [mAu] | Area %  |
|--------|-----------------|------|-------------|--------------|--------------|---------|
| 1      | 14.641          | BB   | 0.3194      | 932.86615    | 44.35792     | 25.9195 |
| 2      | 17.194          | BB   | 0.3907      | 2666.22974   | 102.76986    | 74.0805 |

Product **3i**

Conditions: *n*-hexane/*iso*-propanol : 90/10, 1.0 mL/min, wavelength = 254 nm

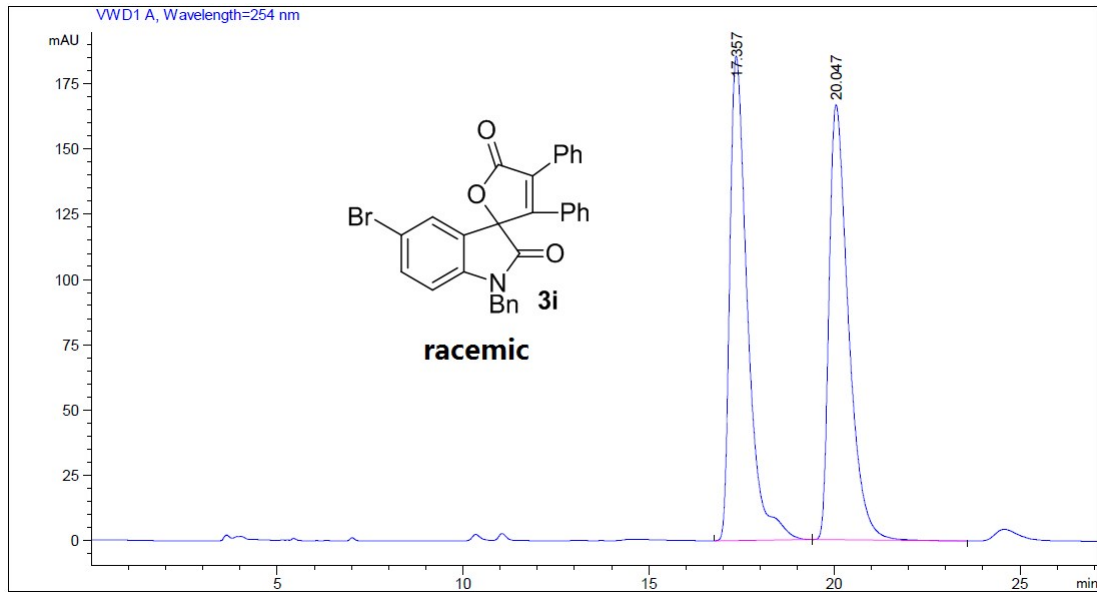

| Peak # | Ret. Time [min] | Type | Width [min] | Area [mAu*S] | Height [mAu] | Area %  |
|--------|-----------------|------|-------------|--------------|--------------|---------|
| 1      | 17.357          | BB   | 0.4991      | 6154.05859   | 185.49564    | 50.4692 |
| 2      | 20.047          | BB   | 0.5478      | 6039.62646   | 166.66092    | 49.5308 |

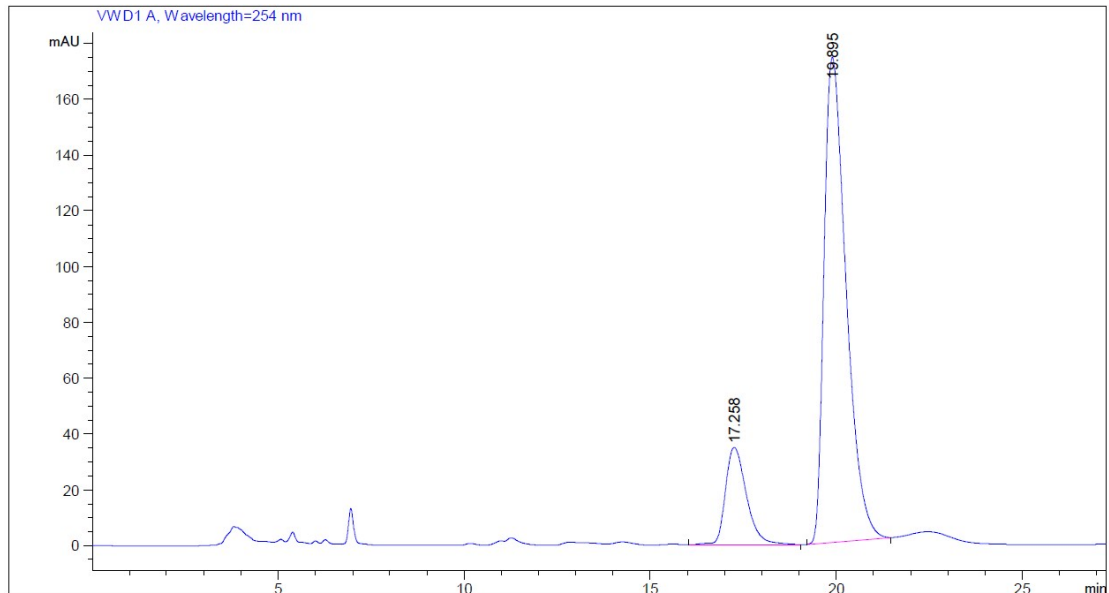

| Peak # | Ret. Time [min] | Type | Width [min] | Area [mAu*S] | Height [mAu] | Area %  |
|--------|-----------------|------|-------------|--------------|--------------|---------|
| 1      | 17.258          | BB   | 0.6041      | 1363.93225   | 34.89117     | 16.0114 |
| 2      | 19.895          | BB   | 0.6320      | 7154.57813   | 173.88145    | 83.9886 |



Product **3j**

Conditions: *n*-hexane/*iso*-propanol : 90/10, 1.0 mL/min, wavelength = 254 nm

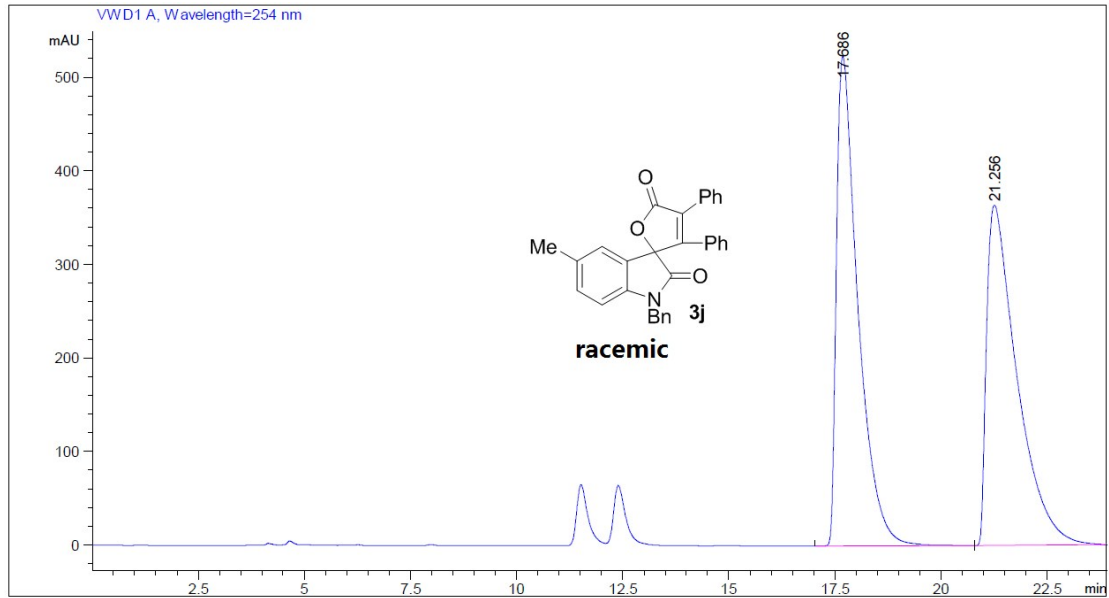

| Peak # | Ret. Time [min] | Type | Width [min] | Area [mAu*S] | Height [mAu] | Area %  |
|--------|-----------------|------|-------------|--------------|--------------|---------|
| 1      | 17.686          | BB   | 0.5192      | 1.84022e4    | 523.33984    | 50.4575 |
| 2      | 21.256          | BBA  | 0.7336      | 1.80685e4    | 363.72095    | 49.5425 |

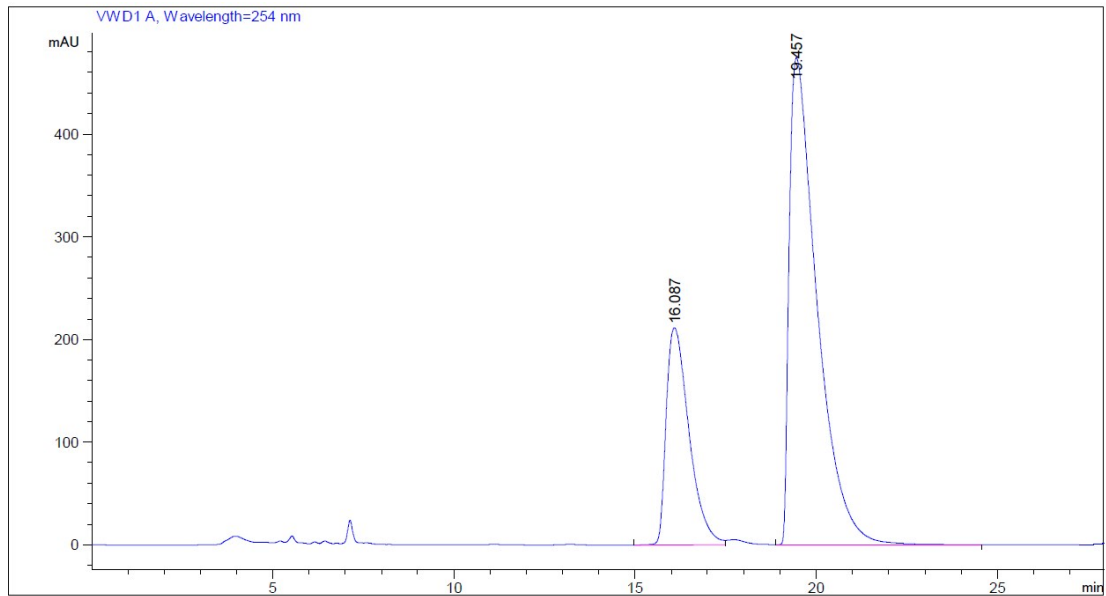

| Peak # | Ret. Time [min] | Type | Width [min] | Area [mAu*S] | Height [mAu] | Area %  |
|--------|-----------------|------|-------------|--------------|--------------|---------|
| 1      | 16.087          | BV   | 0.6777      | 9260.46777   | 211.54900    | 26.8537 |
| 2      | 19.457          | BB   | 0.7906      | 2.52244e4    | 474.18307    | 73.1463 |

Product **3k**

Conditions: *n*-hexane/*iso*-propanol : 90/10, 1.0 mL/min, wavelength = 254 nm

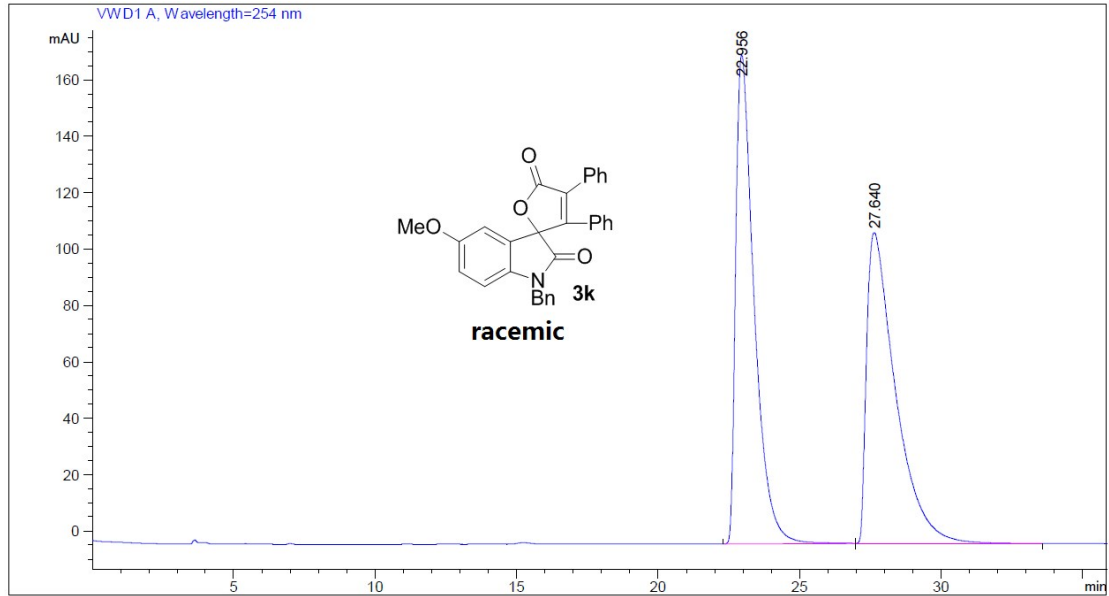

| Peak # | Ret. Time [min] | Type | Width [min] | Area [mAu*S] | Height [mAu] | Area %  |
|--------|-----------------|------|-------------|--------------|--------------|---------|
| 1      | 22.956          | BB   | 0.6810      | 7852.05127   | 173.50180    | 50.0637 |
| 2      | 27.640          | BB   | 1.0423      | 7832.08057   | 110.31128    | 49.9363 |

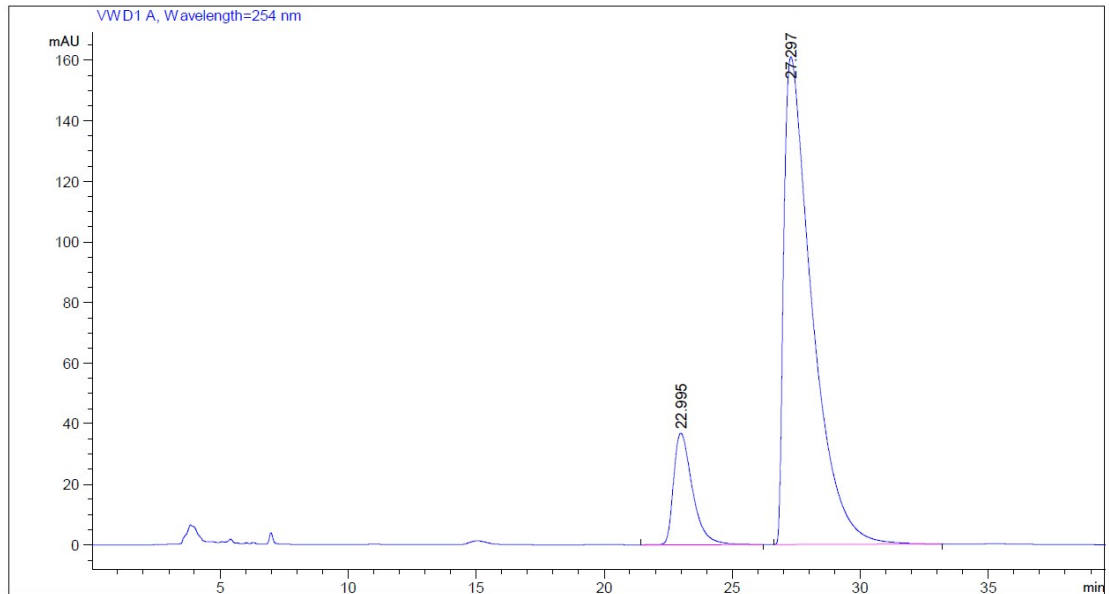

| Peak # | Ret. Time [min] | Type | Width [min] | Area [mAu*S] | Height [mAu] | Area %  |
|--------|-----------------|------|-------------|--------------|--------------|---------|
| 1      | 22.995          | BB   | 0.7765      | 1878.58850   | 36.86554     | 13.2984 |
| 2      | 27.297          | BB   | 1.1190      | 1.22478e4    | 160.91866    | 86.7016 |

### Product 3r

Conditions: *n*-hexane/*iso*-propanol : 85/15, 1.0 mL/min, wavelength = 254 nm

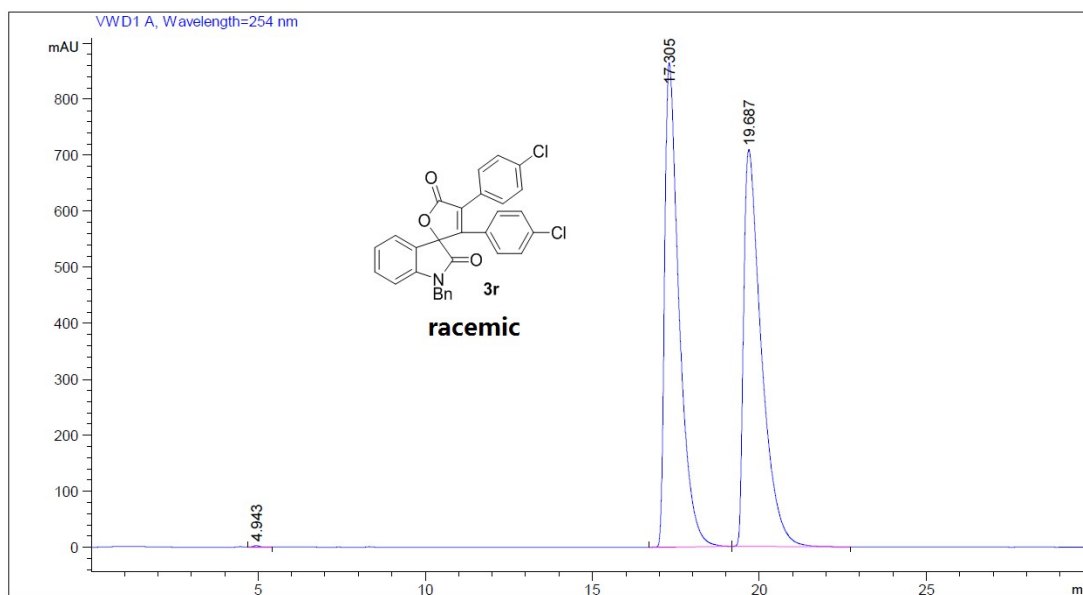

| Peak # | Ret. Time [min] | Type | Width [min] | Area [mAu*S] | Height [mAu] | Area %  |
|--------|-----------------|------|-------------|--------------|--------------|---------|
| 1      | 4.943           | BB   | 0.1835      | 31.53531     | 2.61837      | 0.0604  |
| 2      | 17.305          | BB   | 0.4424      | 2.59696e4    | 864.68646    | 49.7228 |
| 3      | 19.687          | BB   | 0.5428      | 2.62276e4    | 708.61987    | 50.2168 |

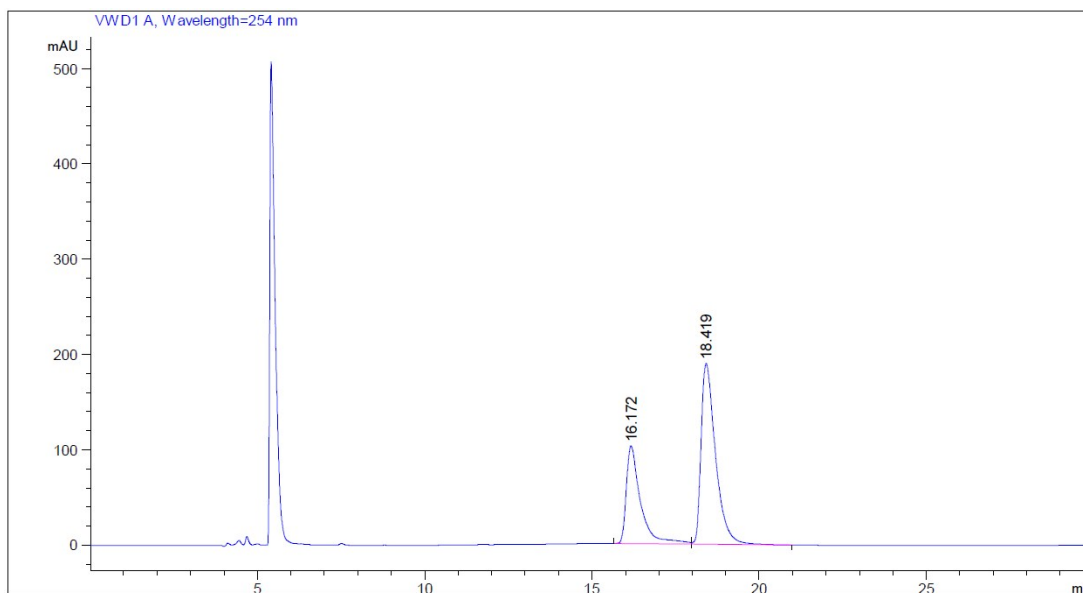

| Peak # | Ret. Time [min] | Type | Width [min] | Area [mAu*S] | Height [mAu] | Area %  |
|--------|-----------------|------|-------------|--------------|--------------|---------|
| 1      | 16.172          | BV   | 0.4324      | 3044.38208   | 102.53335    | 34.8232 |
| 2      | 18.419          | VB   | 0.4512      | 5698.02002   | 189.81140    | 65.1768 |

Product 3t

Conditions: *n*-hexane/*iso*-propanol : 80/20, 1.0 mL/min, wavelength = 254 nm

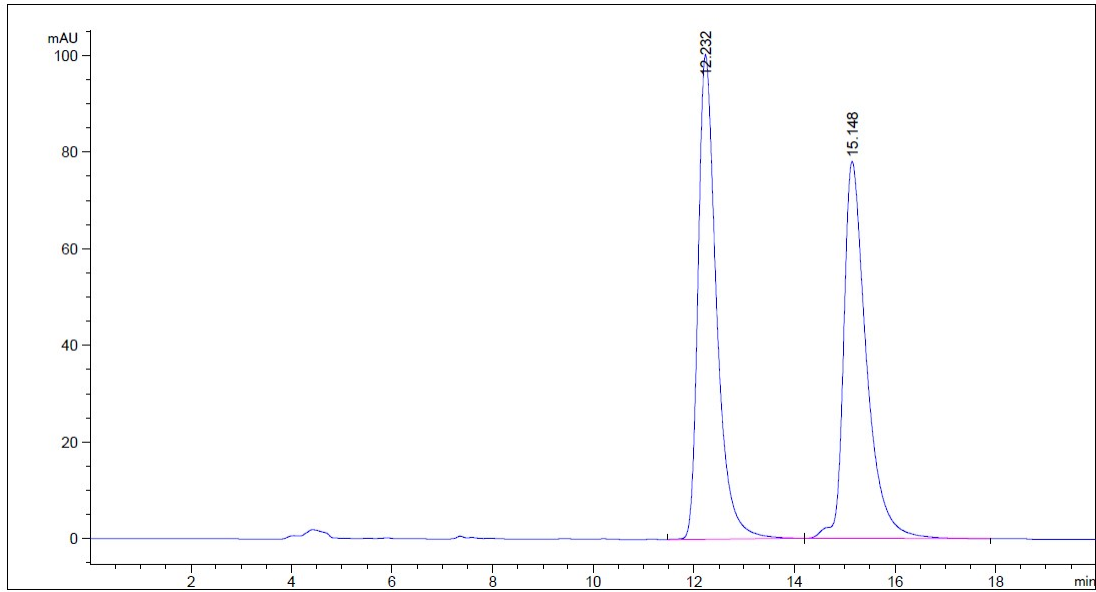

| Peak # | Ret. Time [min] | Type | Width [min] | Area [mAu*S] | Height [mAu] | Area %  |
|--------|-----------------|------|-------------|--------------|--------------|---------|
| 1      | 12.232          | BB   | 0.3834      | 2548.09961   | 100.28635    | 51.1046 |
| 2      | 15.148          | BB   | 0.4676      | 2437.94702   | 78.00513     | 48.8954 |

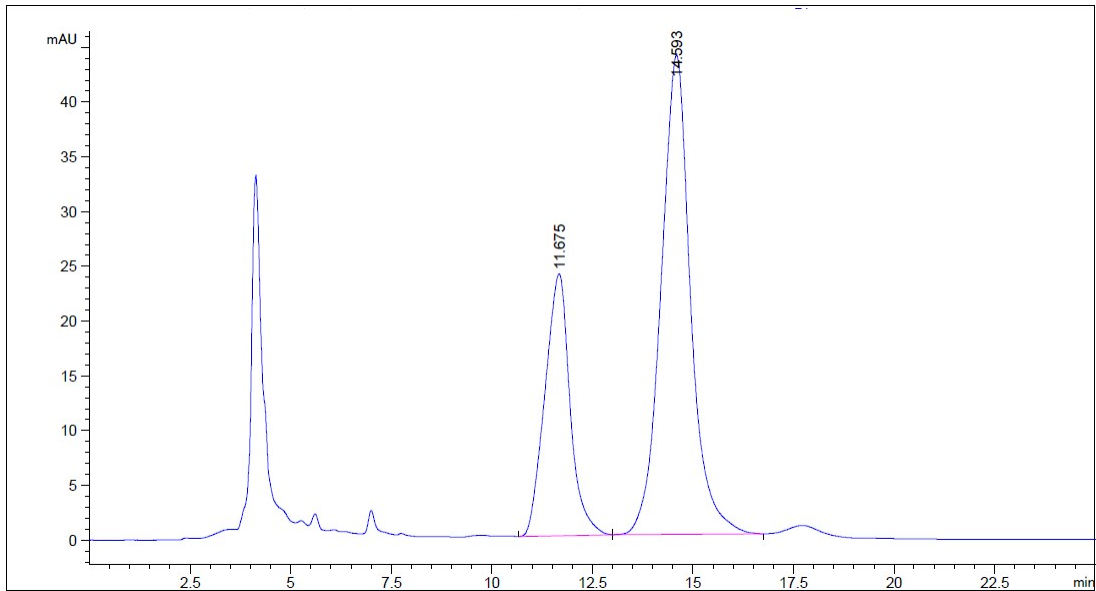

| Peak # | Ret. Time [min] | Type | Width [min] | Area [mAu*S] | Height [mAu] | Area %  |
|--------|-----------------|------|-------------|--------------|--------------|---------|
| 1      | 11.675          | BB   | 0.6625      | 1035.57715   | 23.89983     | 31.7359 |
| 2      | 14.593          | BB   | 0.7684      | 2227.53711   | 43.72440     | 68.2641 |
